# Supplementary material for: A concise synthesis of (alkynyl)(trifluoromethyl)sulfanes via a bismuth(iii)-promoted reaction of trimethyl(alkynyl)silane with trifluoromethanesulfanylamide
Source: Royal Society of Chemistry journal article supplement (doi:10.1039/c4ob01451k), 2014-08-06

**A concise synthesis of (alkynyl)(trifluoromethyl)sulfanes via  
a bismuth(III)-promoted reaction of trimethyl(alkynyl)silane  
with trifluoromethanesulfanylamide**

Jie Sheng<sup>a</sup> and Jie Wu<sup>\*,ab</sup>

<sup>a</sup> *Department of Chemistry, Fudan University, 220 Handan Road, Shanghai 200433, China*

<sup>b</sup> *State Key Laboratory of Organometallic Chemistry, Shanghai Institute of Organic Chemistry,  
Chinese Academy of Sciences, 354 Fenglin Road, Shanghai 200032, China*

jie\_wu@fudan.edu.cn

**Supporting Information**

1. General experimental methods (S2).
2. General experimental procedure and characterization data (S3-S6).
3. <sup>1</sup>H, <sup>13</sup>C, and <sup>19</sup>F NMR spectra of compound **3** (S7-S45).

### General experimental methods:

Unless otherwise stated, all commercial reagents were used as received. All solvents were dried and distilled according to standard procedures. Flash column chromatography was performed using silica gel (60-Å pore size, 32–63µm, standard grade). Analytical thin-layer chromatography was performed using glass plates pre-coated with 0.25 mm 230–400 mesh silica gel impregnated with a fluorescent indicator (254 nm). Thin layer chromatography plates were visualized by exposure to ultraviolet light. Organic solutions were concentrated on rotary evaporators at ~20 Torr at 25–35°C. Nuclear magnetic resonance (NMR) spectra are recorded in parts per million from internal tetramethylsilane on the  $\delta$  scale.  $^1\text{H}$  and  $^{13}\text{C}$  NMR spectra were recorded in  $\text{CDCl}_3$  on a Bruker DRX-400 spectrometer operating at 400 MHz and 100 MHz, respectively. All chemical shift values are quoted in ppm and coupling constants quoted in Hz. High resolution mass spectrometry (HRMS) spectra were obtained on a micrOTOF II Instrument.

*General procedure of the synthesis of (alkynyl)(trifluoromethyl)sulfanes 3 via a bismuth(III)-promoted reaction of trimethyl(alkynyl)silane 1 with trifluoromethanesulfanylamide 2:*

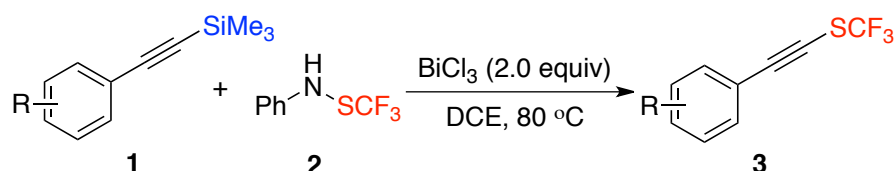

Trifluoromethanesulfanylamide **2** (0.3 mmol, 58.0 mg) was added to a solution of trimethyl(alkynyl)silane **1** (0.2 mmol) and bismuth(III) chloride (0.4 mmol, 126.2 mg) in  $\text{DCE}$  (2.0 mL). The mixture was stirred at  $80\text{ }^\circ\text{C}$  for 8-12 hours. After completion of the reaction as indicated by TLC, the reaction mixture was filtered with silica gel and washed by  $\text{CH}_2\text{Cl}_2$  ( $3 \times 5.0\text{ mL}$ ). The mixture was concentrated in vacuo and the residue was purified by column chromatography on silica gel to provide the product **3**.

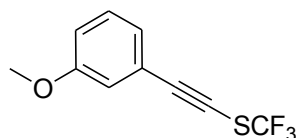

(2-(3-Methoxyphenyl)ethynyl)(trifluoromethyl)sulfane (**3a**)

Yellow oil;  $^1\text{H}$  NMR (400 MHz,  $\text{CDCl}_3$ )  $\delta$  3.87 (s, 3H), 6.93–7.00 (m, 2H), 7.09 (d,  $J = 7.6$  Hz, 1H), 7.25 (t,  $J = 8.0$  Hz, 1H);  $^{13}\text{C}$  NMR (100 MHz,  $\text{CDCl}_3$ )  $\delta$  55.3, 66.5, 101.2, 116.4, 116.8, 122.4, 124.7, 128.1 (q,  $J = 310.3$  Hz), 129.6, 159.3;  $^{19}\text{F}$  NMR (378 MHz,  $\text{CDCl}_3$ )  $\delta$  -44.00 (s); HRMS (ESI) calcd for  $\text{C}_{10}\text{H}_8\text{F}_3\text{OS}$ : 233.0242 ( $\text{M} + \text{H}^+$ ), found: 233.0248.

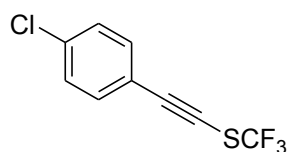

(2-(4-Chlorophenyl)ethynyl)(trifluoromethyl)sulfane (**3b**)

Yellow oil;  $^1\text{H}$  NMR (400 MHz,  $\text{CDCl}_3$ )  $\delta$  7.33 (dd,  $J_1 = 6.8$  Hz,  $J_2 = 1.8$  Hz, 2H), 7.43 (dd,  $J_1 = 6.8$  Hz,  $J_2 = 1.8$  Hz, 2H);  $^{13}\text{C}$  NMR (100 MHz,  $\text{CDCl}_3$ )  $\delta$  67.9, 100.1, 120.0, 128.0 (q,  $J = 311.0$  Hz), 128.9, 133.4, 136.0;  $^{19}\text{F}$  NMR (378 MHz,  $\text{CDCl}_3$ )  $\delta$  -43.86 (s); HRMS (ESI) calcd for  $\text{C}_9\text{H}_5\text{ClF}_3\text{S}$ : 236.9747 ( $\text{M} + \text{H}^+$ ), found: 236.9758.

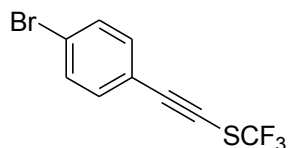

(2-(4-Bromophenyl)ethynyl)(trifluoromethyl)sulfane (**3c**)

Yellow oil;  $^1\text{H}$  NMR (400 MHz,  $\text{CDCl}_3$ )  $\delta$  7.35 (dt,  $J_1 = 8.8$  Hz,  $J_2 = 2.0$  Hz, 2H), 7.49 (dt,  $J_1 = 8.8$  Hz,  $J_2 = 2.0$  Hz, 2H);  $^{13}\text{C}$  NMR (100 MHz,  $\text{CDCl}_3$ )  $\delta$  68.1, 100.2, 120.4, 124.3, 127.9 (q,  $J = 311.0$  Hz), 131.8, 133.5;  $^{19}\text{F}$  NMR (378 MHz,  $\text{CDCl}_3$ )  $\delta$  -43.83 (s); HRMS (ESI) calcd for  $\text{C}_9\text{H}_5\text{BrF}_3\text{S}$ : 280.9242 ( $\text{M} + \text{H}^+$ ), found: 280.9240.

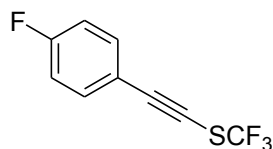

(2-(4-Fluorophenyl)ethynyl)(trifluoromethyl)sulfane (**3d**)

Brown oil;  $^1\text{H}$  NMR (400 MHz,  $\text{CDCl}_3$ )  $\delta$  7.03–7.07 (m, 2H), 7.48–7.51 (m, 2H);  $^{13}\text{C}$  NMR (100 MHz,  $\text{CDCl}_3$ )  $\delta$  66.7, 100.2, 111.8, 115.9 (d,  $^2J_{\text{CF}} = 22.6$  Hz), 128.1 (q,  $J = 310.8$  Hz), 134.52 (d,  $^3J_{\text{CF}} = 8.6$  Hz), 163.4 (d,  $^1J_{\text{CF}} = 251.6$  Hz);  $^{19}\text{F}$  NMR (378 MHz,  $\text{CDCl}_3$ )  $\delta$  -44.03 (s), -108.37(s); HRMS (ESI) calcd for  $\text{C}_9\text{H}_5\text{F}_4\text{S}$ : 221.0043 (M +  $\text{H}^+$ ), found: 221.0057.

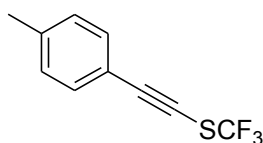

(2-*p*-Tolylethynyl)(trifluoromethyl)sulfane (**3e**)

Yellow oil;  $^1\text{H}$  NMR (400 MHz,  $\text{CDCl}_3$ )  $\delta$  2.37 (s, 3H), 7.16 (d,  $J = 8.0$  Hz, 2H), 7.40 (d,  $J = 8.0$  Hz, 2H);  $^{13}\text{C}$  NMR (100 MHz,  $\text{CDCl}_3$ )  $\delta$  21.6, 65.8, 101.6, 118.5, 128.2 (q,  $J = 310.8$  Hz), 129.3, 132.3, 140.3;  $^{19}\text{F}$  NMR (378 MHz,  $\text{CDCl}_3$ )  $\delta$  -44.26 (s); HRMS (ESI) calcd for  $\text{C}_{10}\text{H}_8\text{F}_3\text{S}$ : 217.0293 (M +  $\text{H}^+$ ), found: 217.0281.

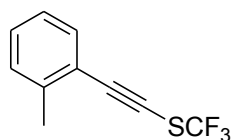

(2-*o*-Tolylethynyl)(trifluoromethyl)sulfane (**3f**)

Brown oil;  $^1\text{H}$  NMR (400 MHz,  $\text{CDCl}_3$ )  $\delta$  2.45 (s, 3H), 7.17 (t,  $J = 7.5$  Hz, 1H), 7.23 (d,  $J = 7.6$  Hz, 1H), 7.29 (td,  $J = 7.6, 1.2$  Hz, 1H), 7.45 (d,  $J = 7.6$  Hz, 1H);  $^{13}\text{C}$  NMR (100 MHz,  $\text{CDCl}_3$ )  $\delta$  20.5, 70.1, 100.4, 121.4, 125.7, 128.2 (q,  $J = 303.9$  Hz), 129.7, 132.3, 141.3;  $^{19}\text{F}$  NMR (378 MHz,  $\text{CDCl}_3$ )  $\delta$  -44.32 (s); HRMS (ESI) calcd for  $\text{C}_{10}\text{H}_8\text{F}_3\text{S}$ : 217.0293, found: 217.0295.

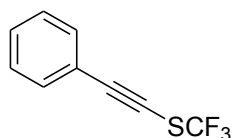

(2-Phenylethynyl)(trifluoromethyl)sulfane (**3g**)

Brown oil;  $^1\text{H}$  NMR (400 MHz,  $\text{CDCl}_3$ )  $\delta$  7.36–7.39 (m, 2H), 7.42–7.43 (m, 1H),

7.50–7.52 (m, 2H);  $^{13}\text{C}$  NMR (100 MHz,  $\text{CDCl}_3$ )  $\delta$  66.7, 101.3, 121.5, 128.0 (q,  $J = 294.8$  Hz), 128.5, 129.7, 132.2;  $^{19}\text{F}$  NMR (378 MHz,  $\text{CDCl}_3$ )  $\delta$  -44.08 (s); HRMS (ESI) calcd for  $\text{C}_9\text{H}_6\text{F}_3\text{S}$ : 203.0137 ( $\text{M} + \text{H}^+$ ), found: 203.0131.

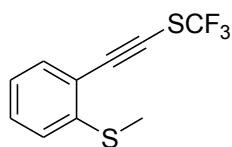

1-(Methylthio)-2-(2-(trifluoromethylthio)ethynyl)benzene (**3h**)

Brown oil;  $^1\text{H}$  NMR (400 MHz,  $\text{CDCl}_3$ )  $\delta$  2.49 (s, 3H), 7.11 (td,  $J_1 = 7.6$  Hz,  $J_2 = 0.7$  Hz, 1H), 7.18 (d,  $J = 8.0$  Hz, 1H), 7.33 – 7.37 (m, 1H), 7.45 (dd,  $J_1 = 7.6$  Hz,  $J_2 = 1.0$  Hz, 1H);  $^{13}\text{C}$  NMR (100 MHz,  $\text{CDCl}_3$ )  $\delta$  15.1, 73.0, 98.7, 119.7, 124.3, 124.4, 128.0 (q,  $J = 311.0$  Hz), 130.1, 133.1, 143.1;  $^{19}\text{F}$  NMR (378 MHz,  $\text{CDCl}_3$ )  $\delta$  -43.86 (s); HRMS (ESI) calcd for  $\text{C}_{10}\text{H}_8\text{F}_3\text{S}_2$ : 249.0014 ( $\text{M} + \text{H}^+$ ), found: 249.0028.

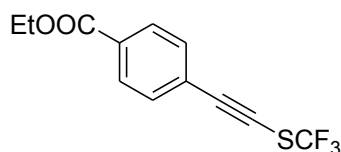

Ethyl 4-(2-(trifluoromethylthio)ethynyl)benzoate (**3i**)

Yellow oil;  $^1\text{H}$  NMR (400 MHz,  $\text{CDCl}_3$ )  $\delta$  1.40 (t,  $J = 7.1$  Hz, 3H), 4.39 (q,  $J = 7.1$  Hz, 2H), 7.54 (d,  $J = 8.4$  Hz, 2H), 8.02 (d,  $J = 8.4$  Hz, 2H);  $^{13}\text{C}$  NMR (100 MHz,  $\text{CDCl}_3$ )  $\delta$  14.3, 61.3, 69.9, 100.5, 125.9, 127.9 (q,  $J = 293.9$  Hz), 129.5, 131.1, 131.6, 165.7;  $^{19}\text{F}$  NMR (378 MHz,  $\text{CDCl}_3$ )  $\delta$  -43.62 (s); HRMS (ESI) calcd for  $\text{C}_{12}\text{H}_{10}\text{F}_3\text{O}_2\text{S}$ : 275.0348 ( $\text{M} + \text{H}^+$ ), found: 275.0342.

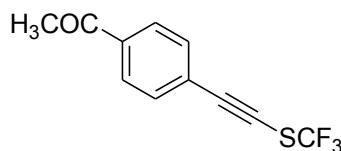

1-(4-(2-(Trifluoromethylthio)ethynyl)phenyl)ethanone (**3j**)

Brown oil;  $^1\text{H}$  NMR (400 MHz,  $\text{CDCl}_3$ )  $\delta$  2.60 (s, 3H), 7.55 (d,  $J = 8.0$  Hz, 2H), 7.92 (d,  $J = 8.2$  Hz, 2H);  $^{13}\text{C}$  NMR (100 MHz,  $\text{CDCl}_3$ )  $\delta$  26.6, 70.4, 100.4, 127.9 (q,  $J = 311.2$  Hz), 128.2, 128.3, 131.8, 137.2, 197.1;  $^{19}\text{F}$  NMR (378 MHz,  $\text{CDCl}_3$ )  $\delta$  -43.59

(s); HRMS (ESI) calcd for  $C_{11}H_8F_3OS$ : 245.0242 ( $M + H^+$ ), found: 245.0236.

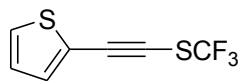

2-(2-(Trifluoromethylthio)ethynyl)thiophene (**3k**)

Yellow oil;  $^1H$  NMR (400 MHz,  $CDCl_3$ )  $\delta$  7.00–7.04 (m, 1H), 7.27–7.30 (m, 1H), 7.38–7.42 (m, H);  $^{13}C$  NMR (100 MHz,  $CDCl_3$ )  $\delta$  71.4, 99.5, 123.4, 126.7, 127.9 (q,  $J = 314.9$  Hz), 127.7, 130.3;  $^{19}F$  NMR (378 MHz,  $CDCl_3$ )  $\delta$  -44.18 (s); HRMS (ESI) calcd for  $C_7H_4F_3S_2$ : 208.9701 ( $M + H^+$ ), found: 208.9707.

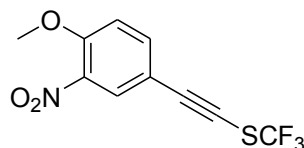

(2-(4-Methoxy-3-nitrophenyl)ethynyl)(trifluoromethyl)sulfane (**3l**)

Yellow oil;  $^1H$  NMR (400 MHz,  $CDCl_3$ )  $\delta$  3.98 (s, 3H), 7.04 (d,  $J = 8.7$  Hz, 1H), 7.64 (dd,  $J_1 = 8.7$  Hz,  $J_2 = 2.1$  Hz, 1H), 7.97 (d,  $J = 2.1$  Hz, 1H);  $^{13}C$  NMR (100 MHz,  $CDCl_3$ )  $\delta$  55.7, 78.0, 81.0, 113.5, 114.6, 128.8 (q,  $J = 313.3$  Hz), 129.3, 131.7, 137.6, 153.0;  $^{19}F$  NMR (378 MHz,  $CDCl_3$ )  $\delta$  -43.69 (s); HRMS (ESI) calcd for  $C_{10}H_7F_3NO_3S$ : 278.0093 ( $M + H^+$ ), found: 278.0085.

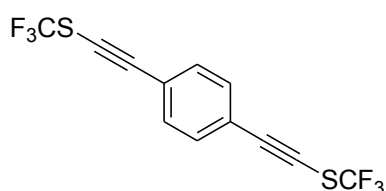

1,4-Bis(2-(trifluoromethylthio)ethynyl)benzene (**3m**)

White solid;  $^1H$  NMR (400 MHz,  $CDCl_3$ )  $\delta$  7.46 (s, 4H);  $^{13}C$  NMR (100 MHz,  $CDCl_3$ )  $\delta$  69.6, 100.4, 122.6, 127.9 (q,  $J = 312.5$  Hz), 131.9;  $^{19}F$  NMR (378 MHz,  $CDCl_3$ )  $\delta$  -43.71 (s); HRMS (ESI) calcd for  $C_{12}H_5F_6S_2$ : 326.9731 ( $M + H^+$ ), found: 326.9745.

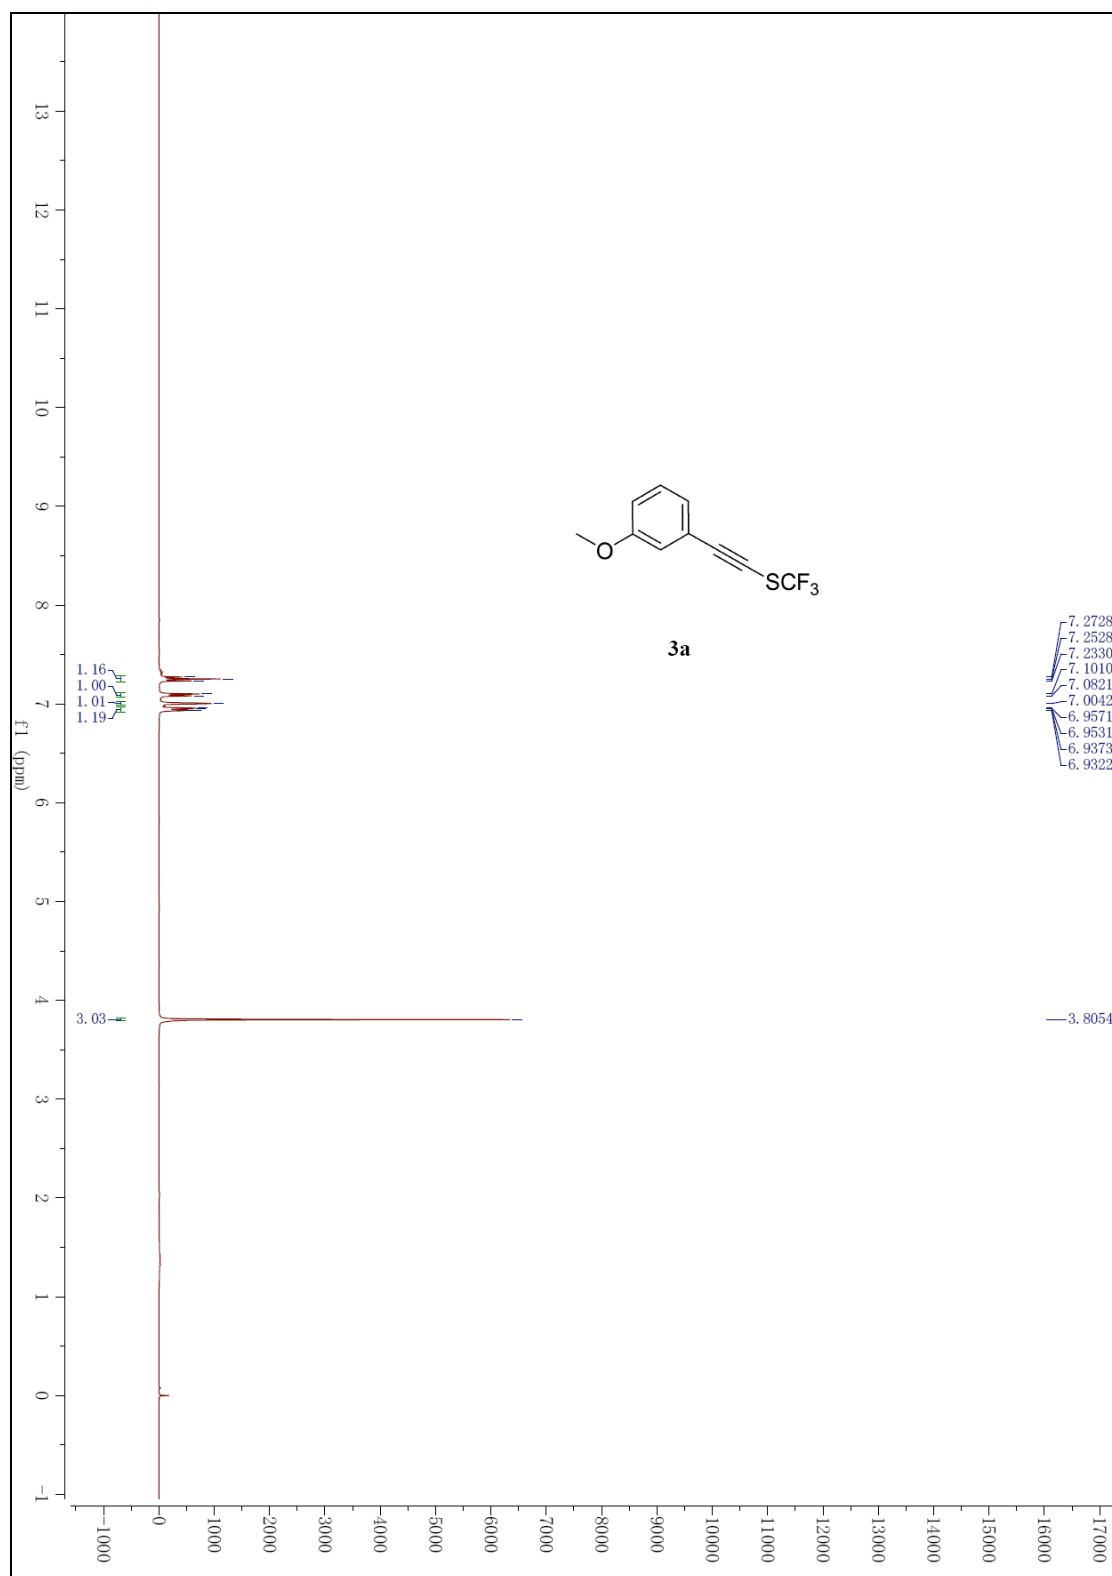

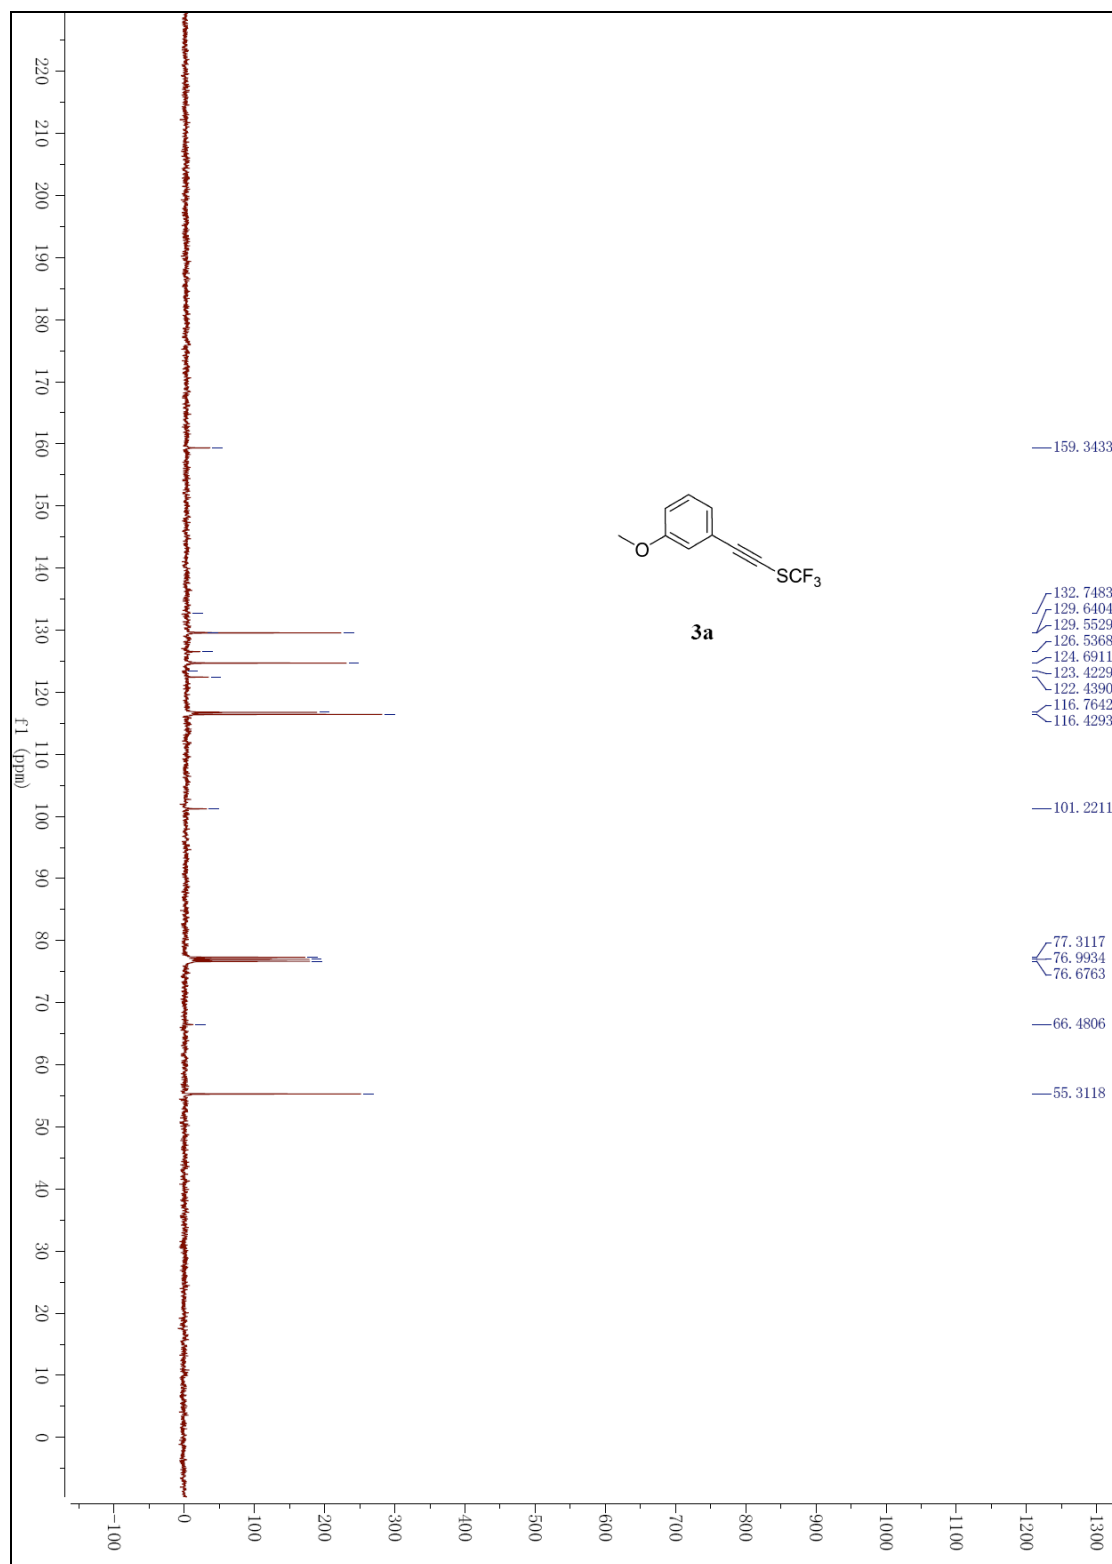



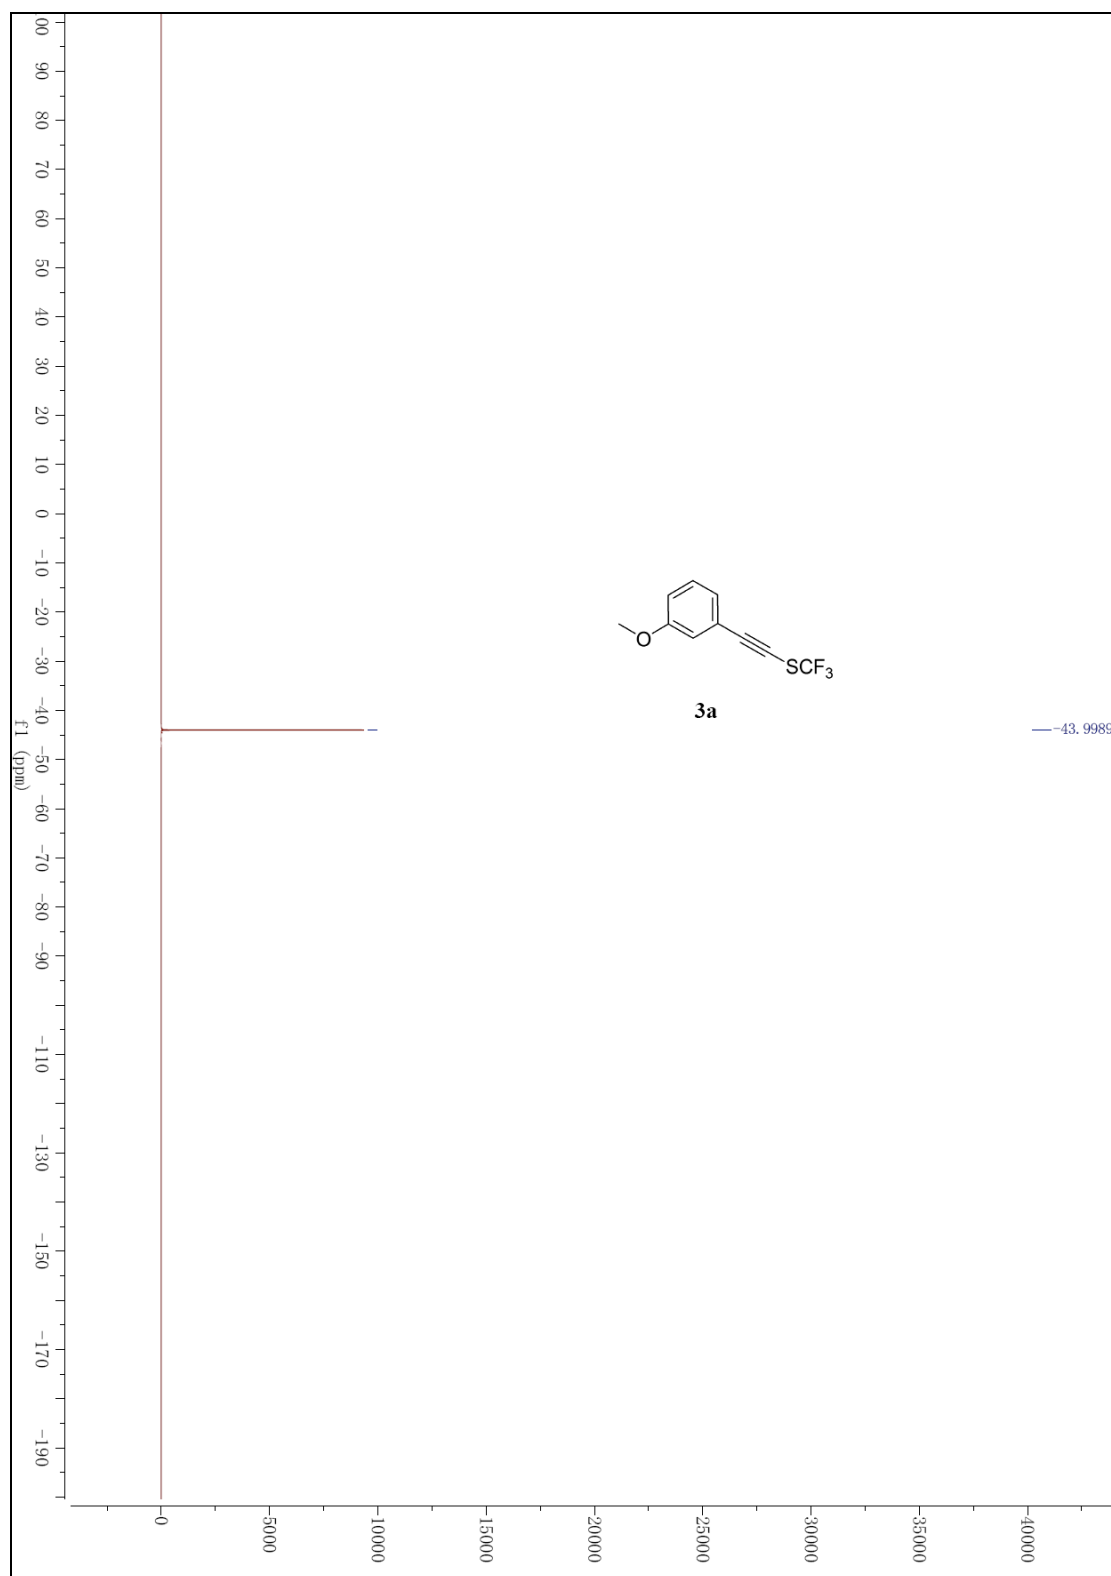

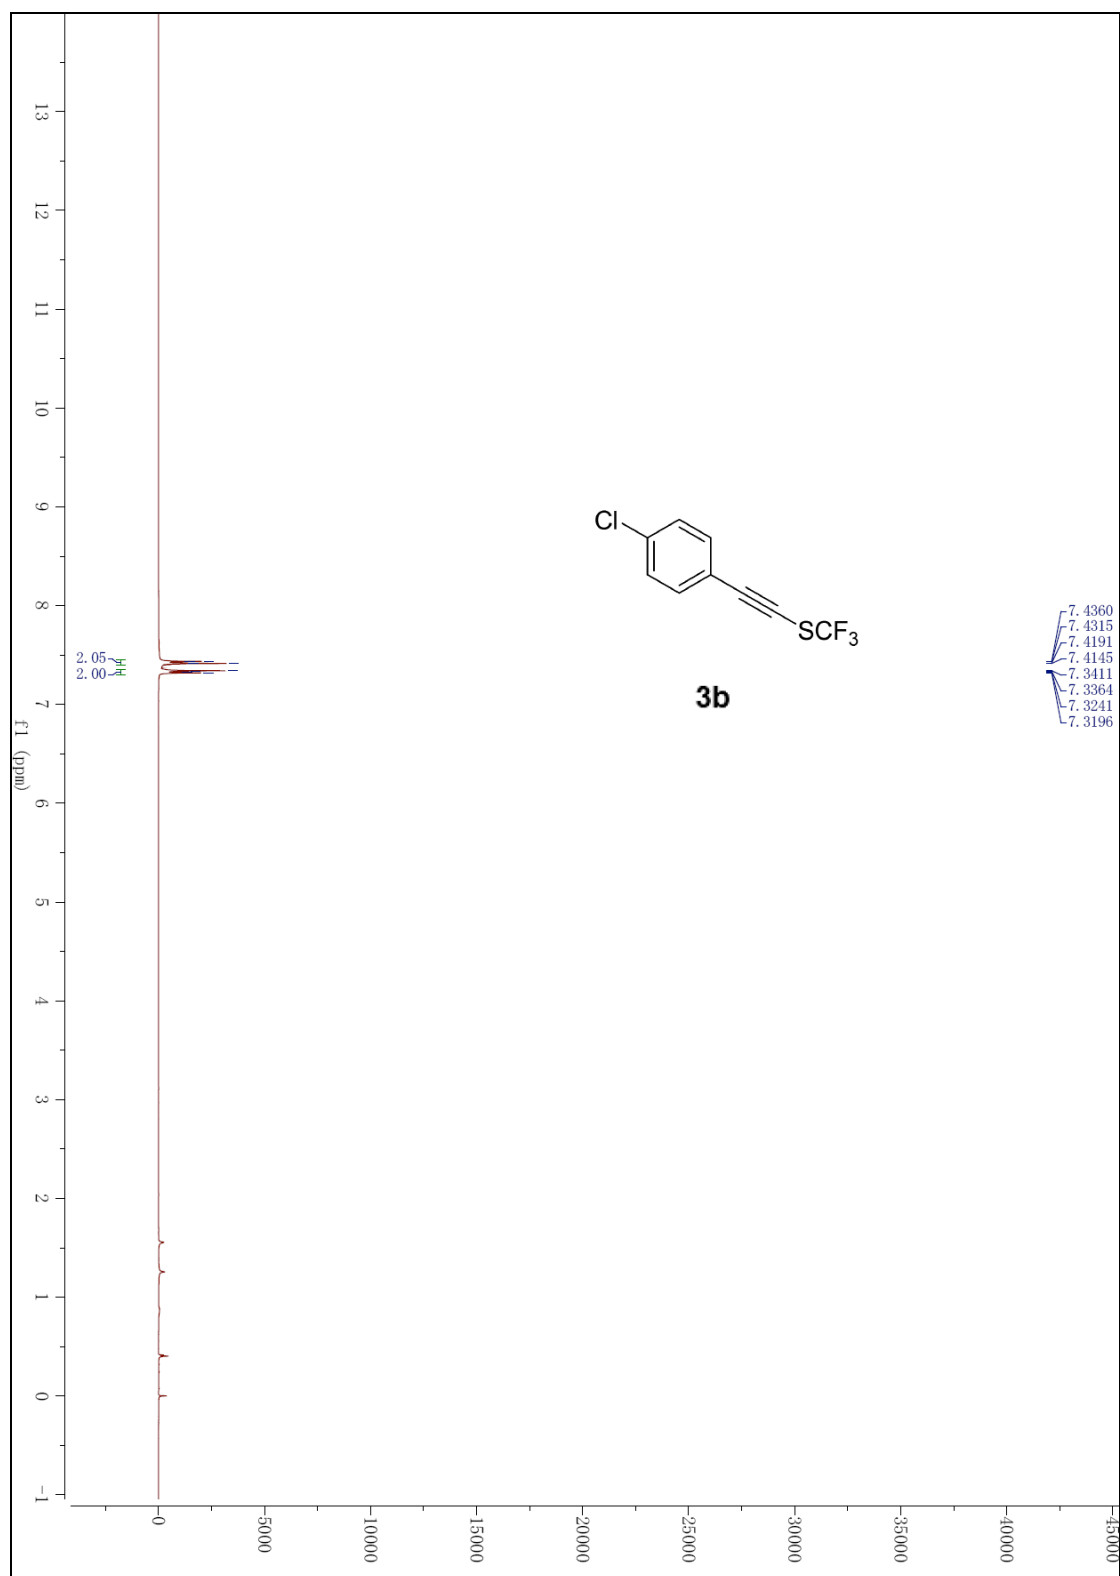

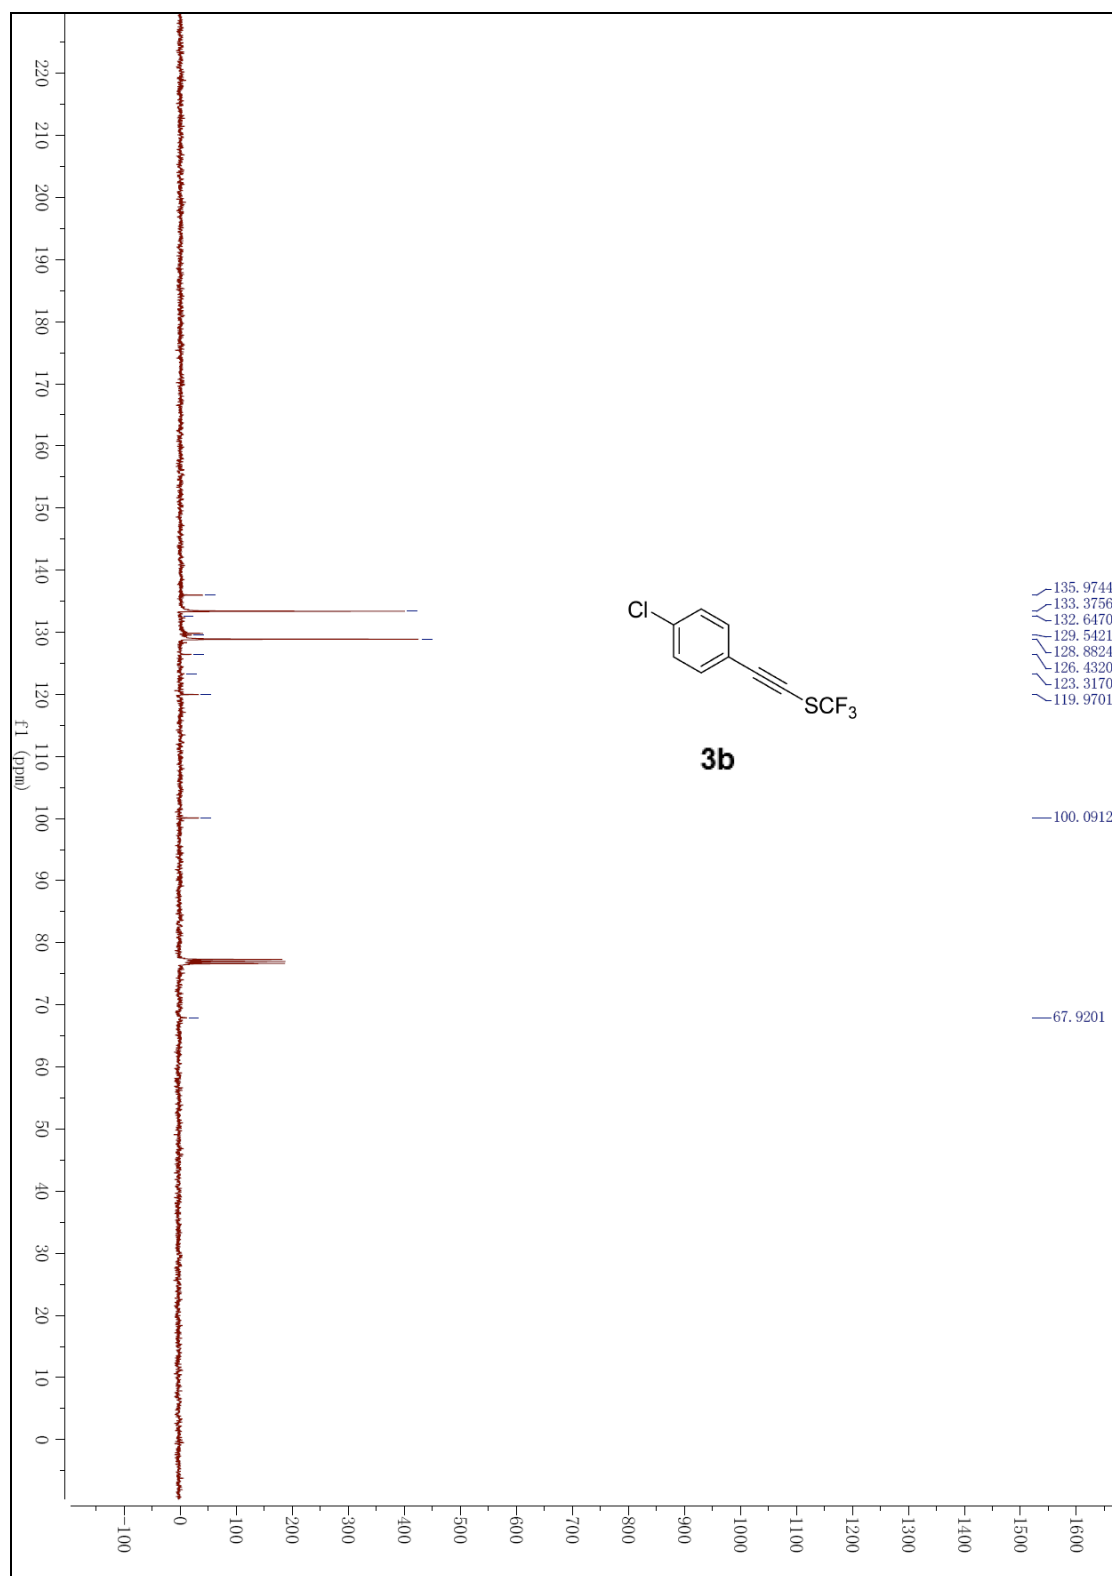

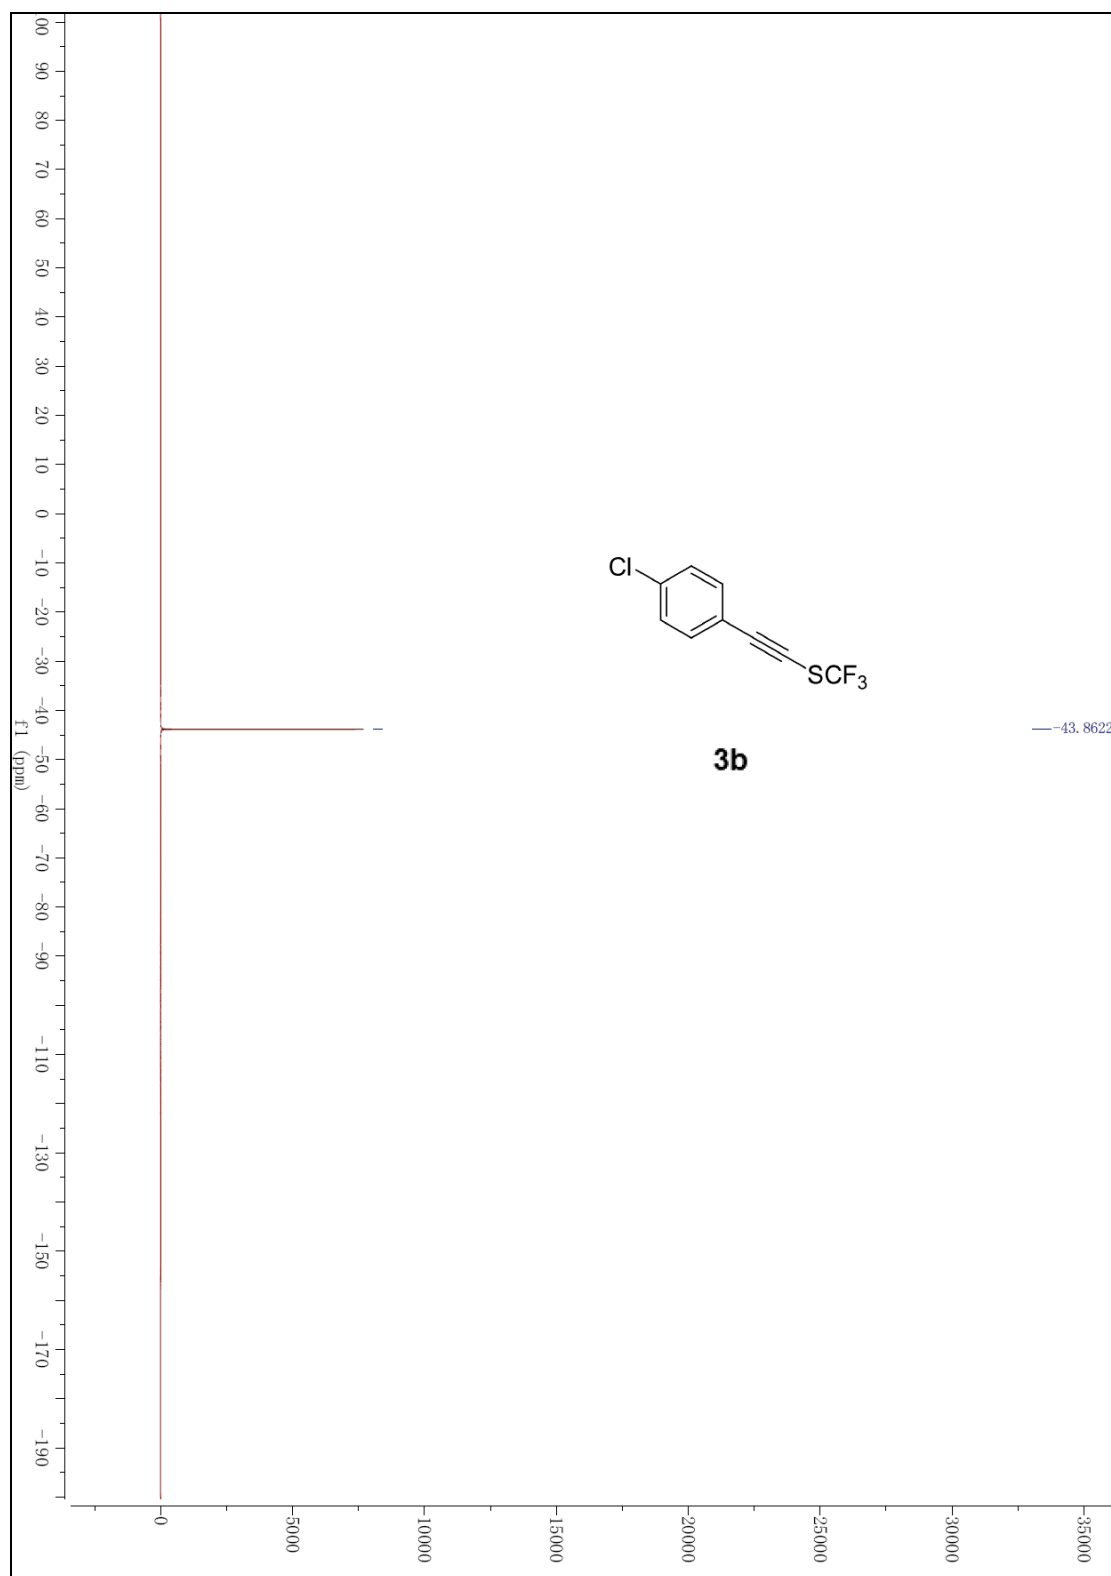

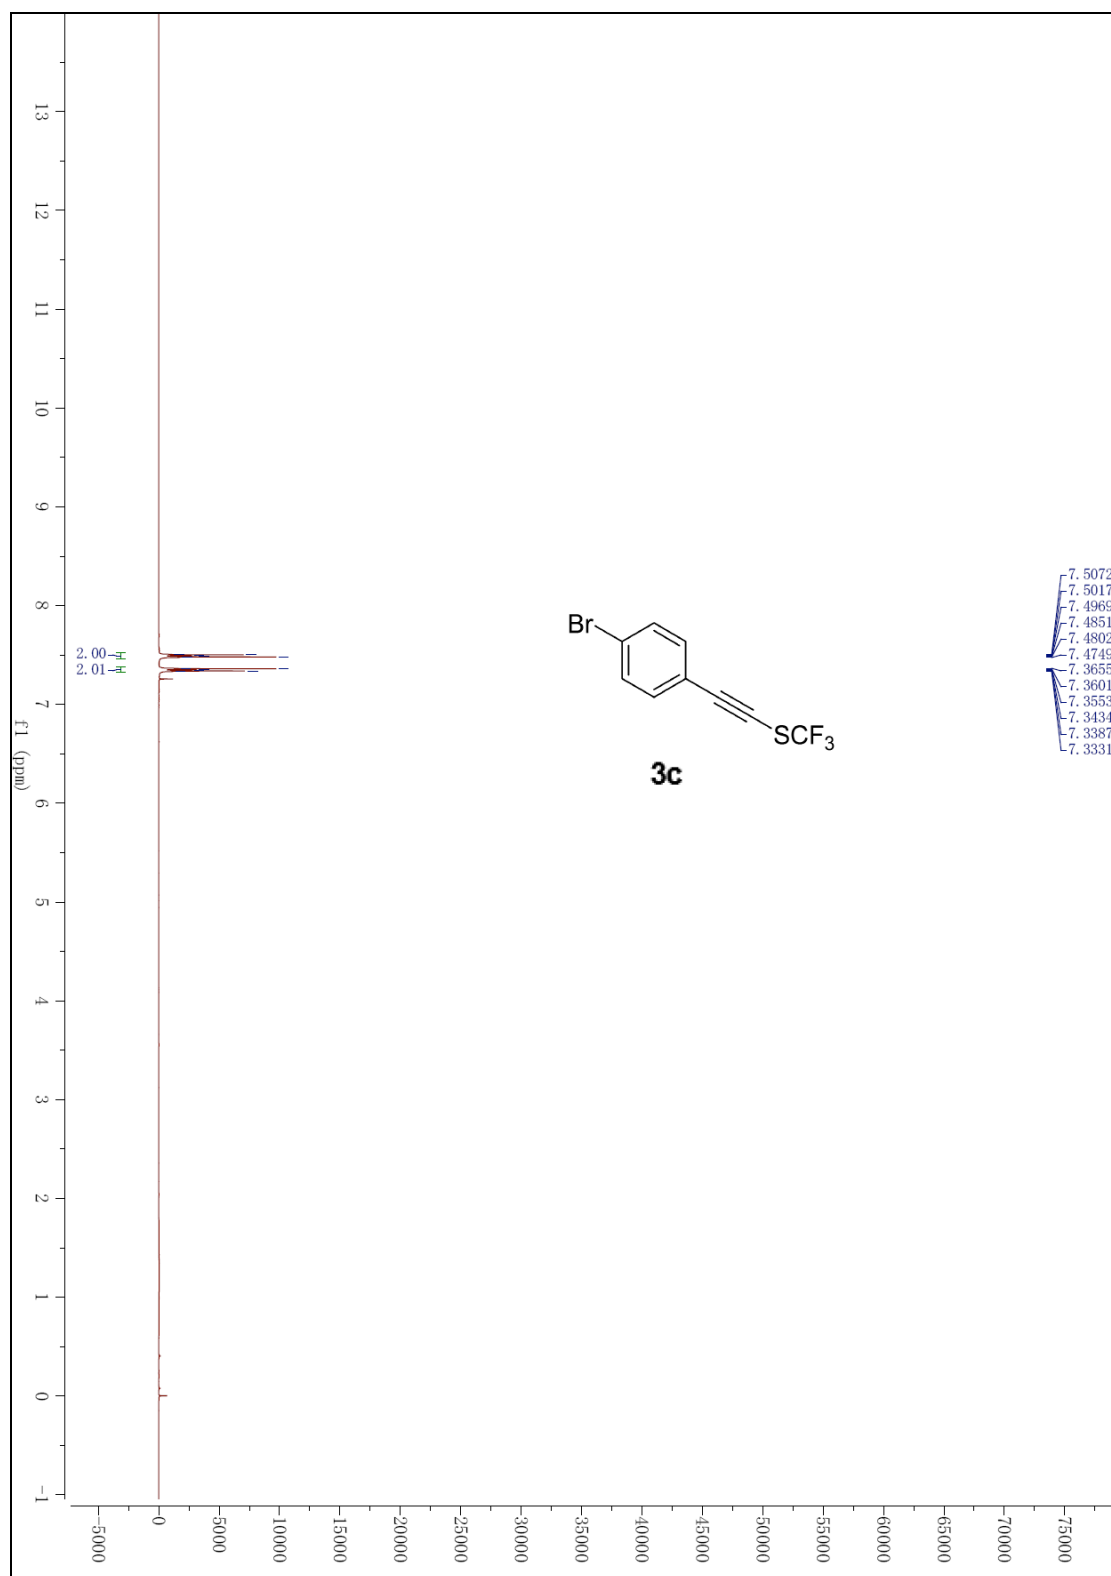

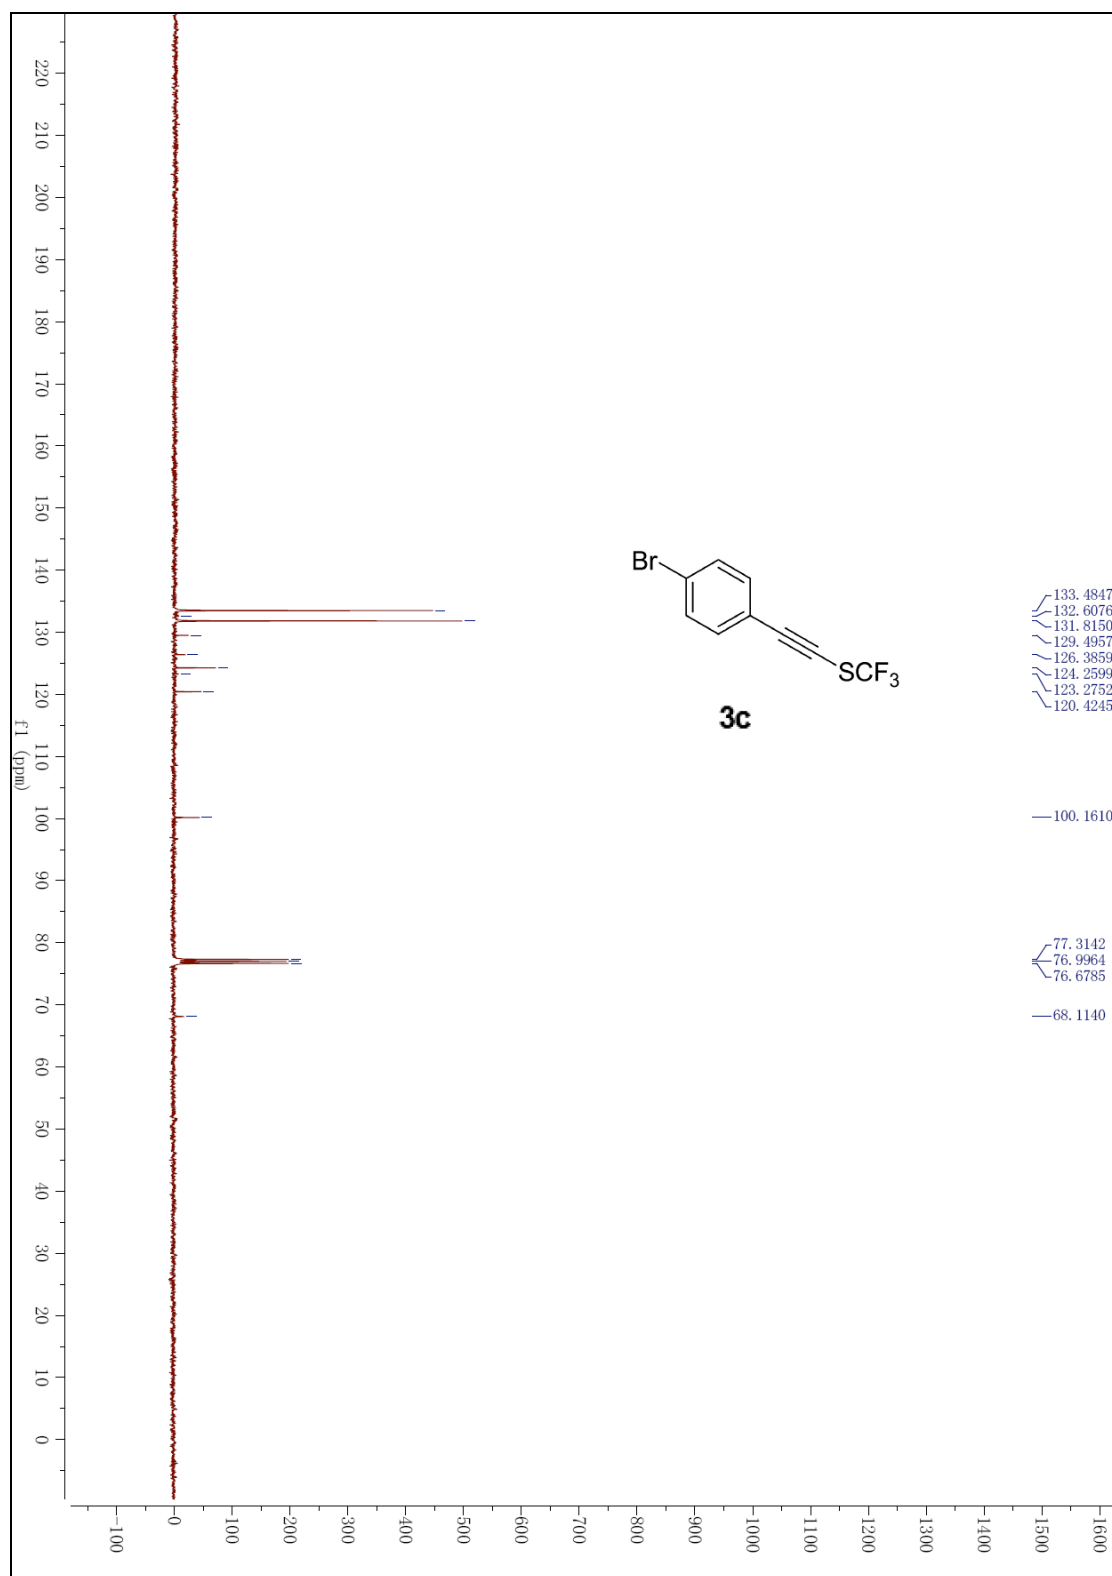

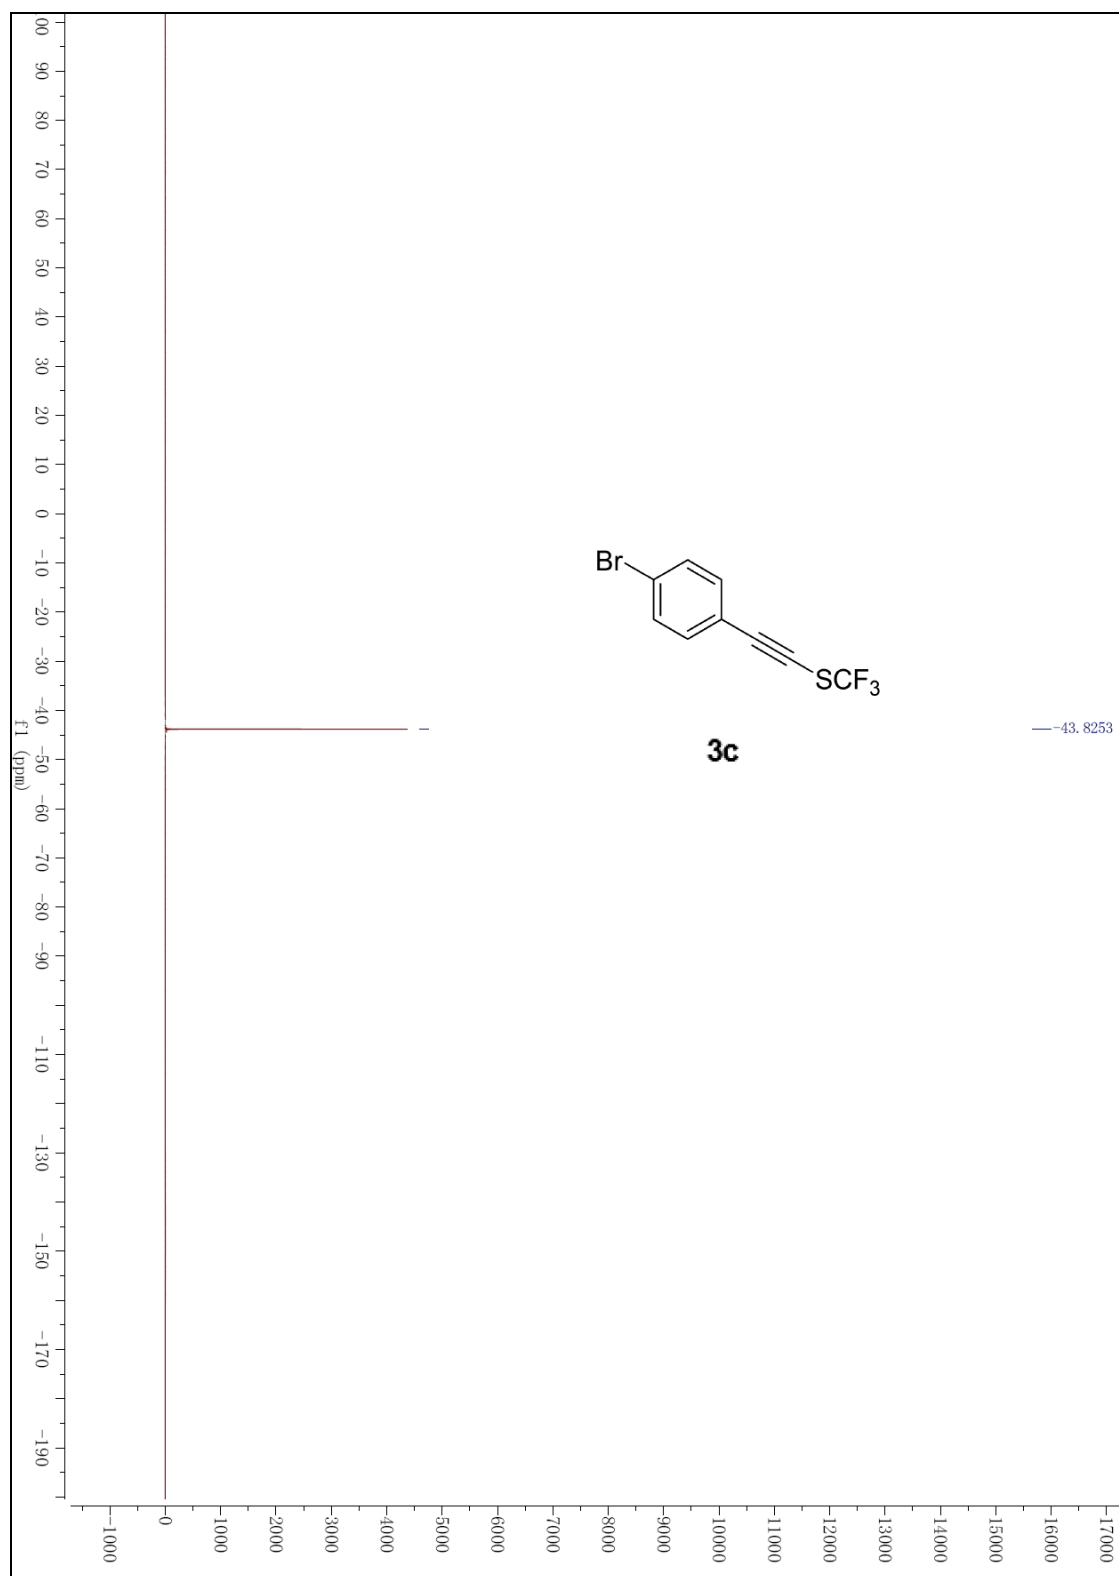

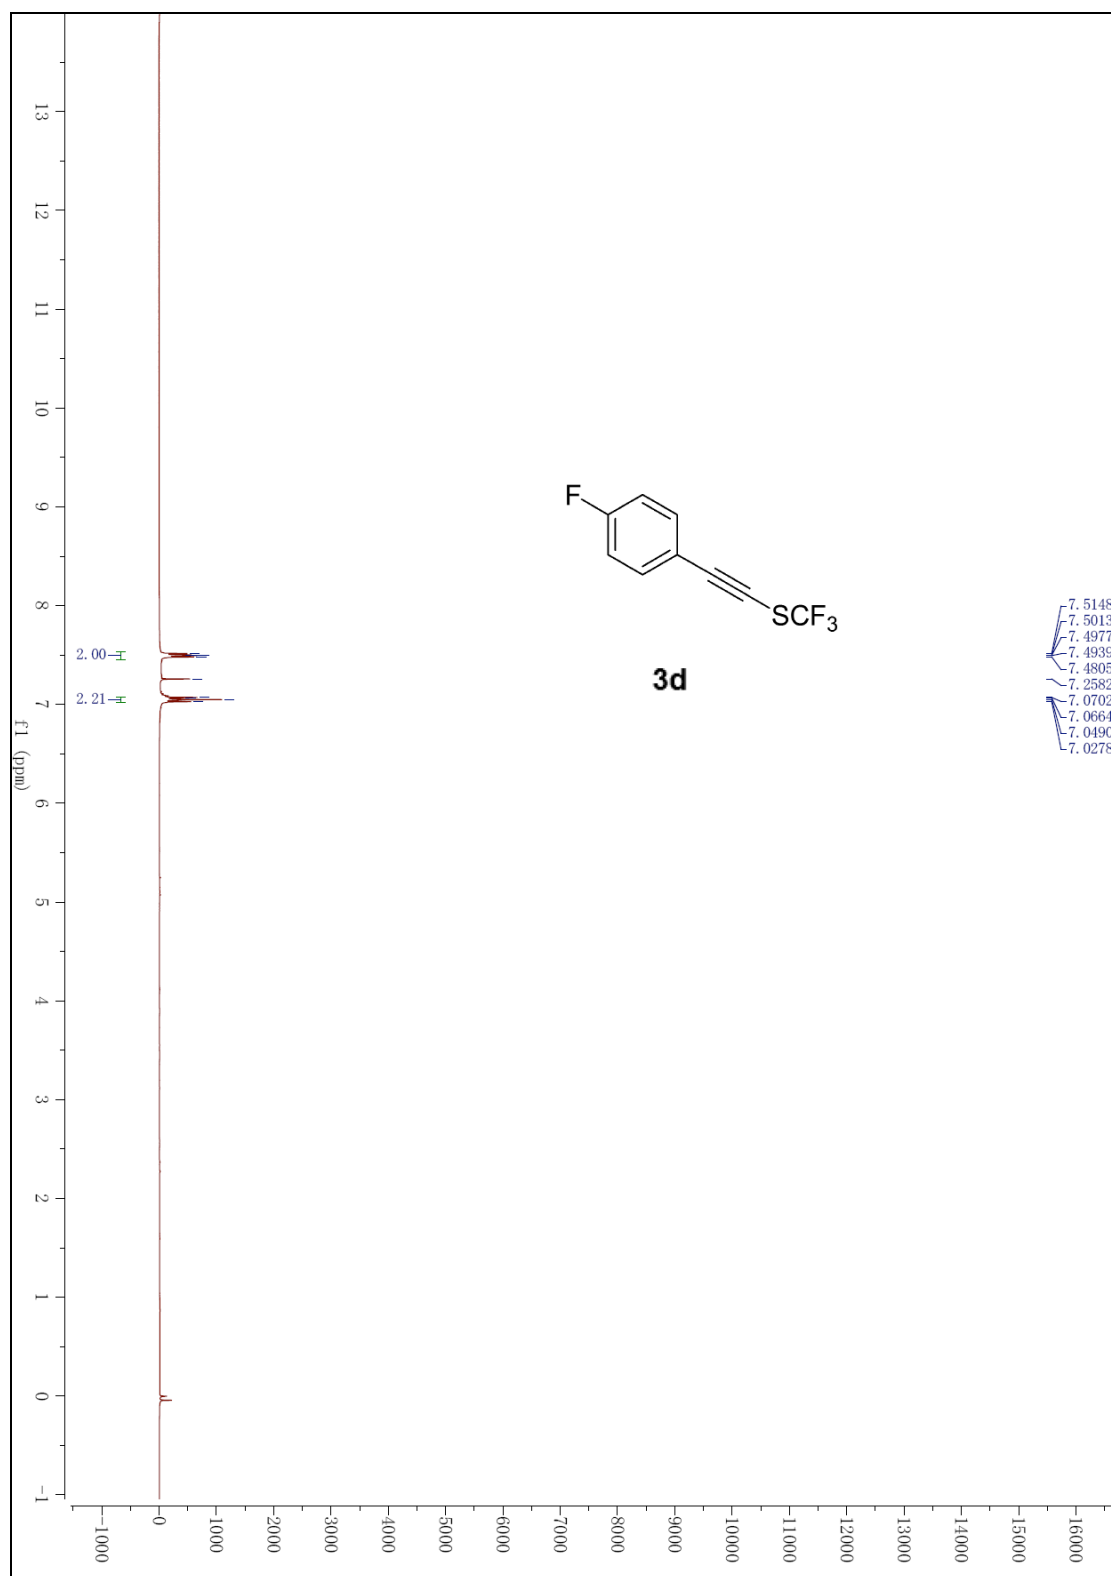



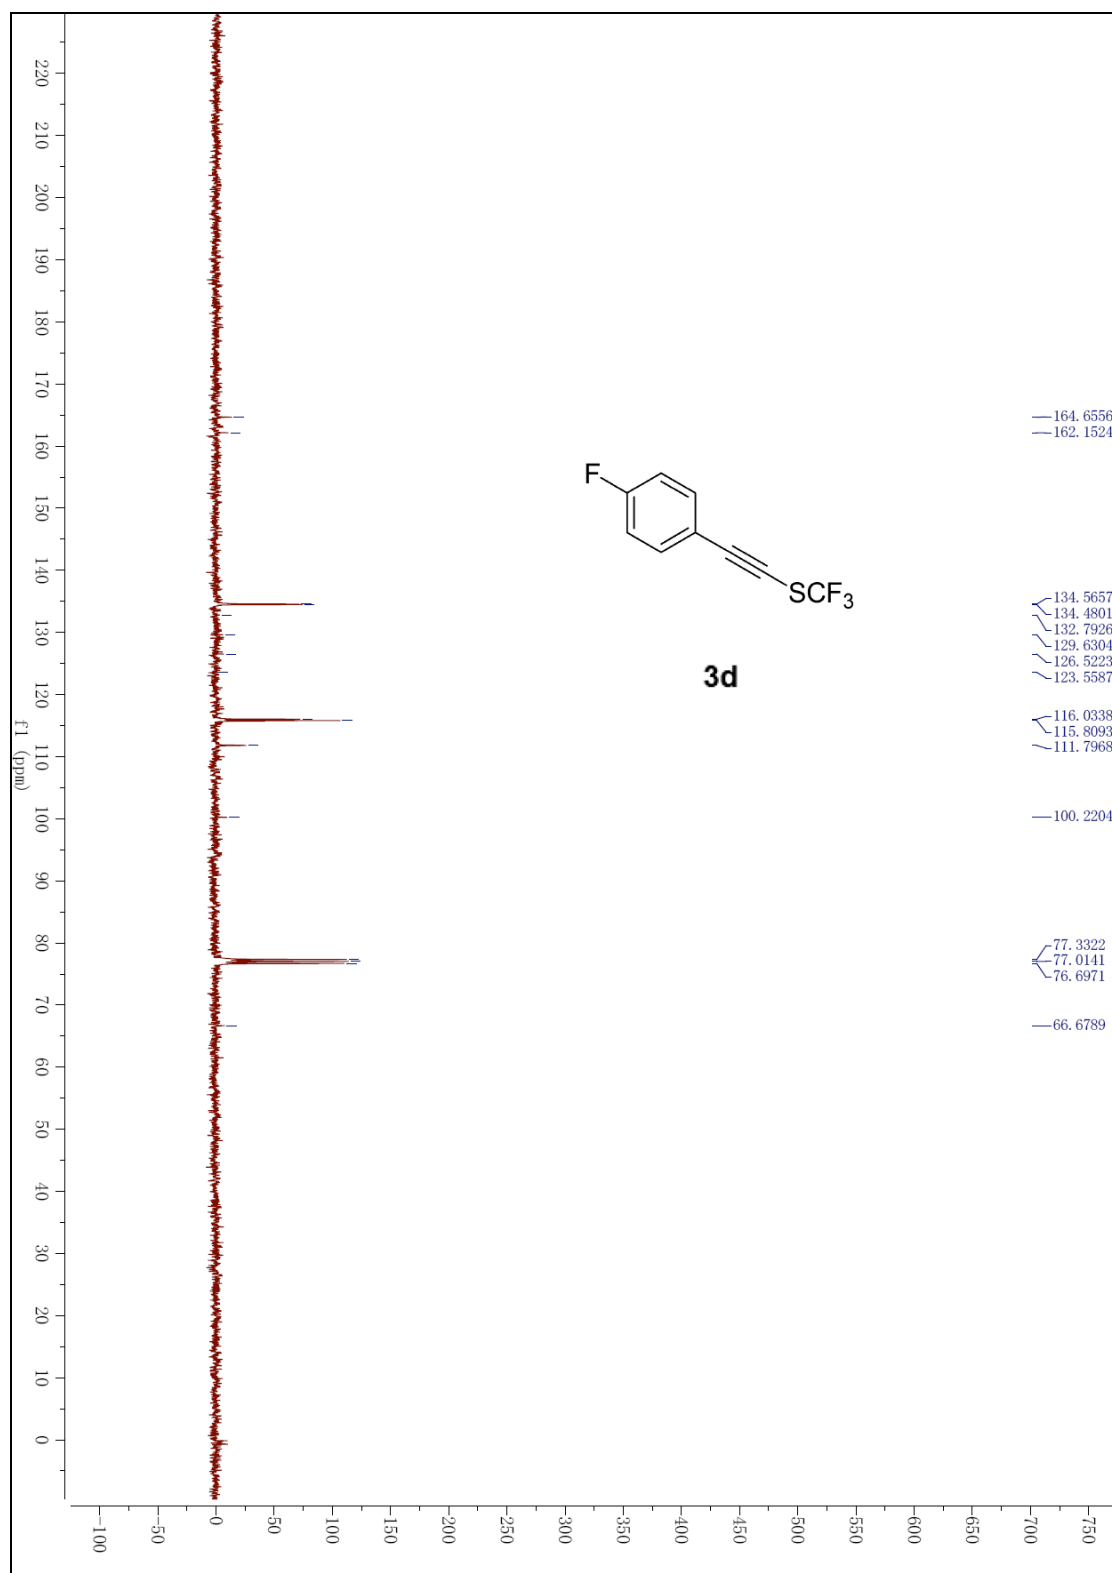

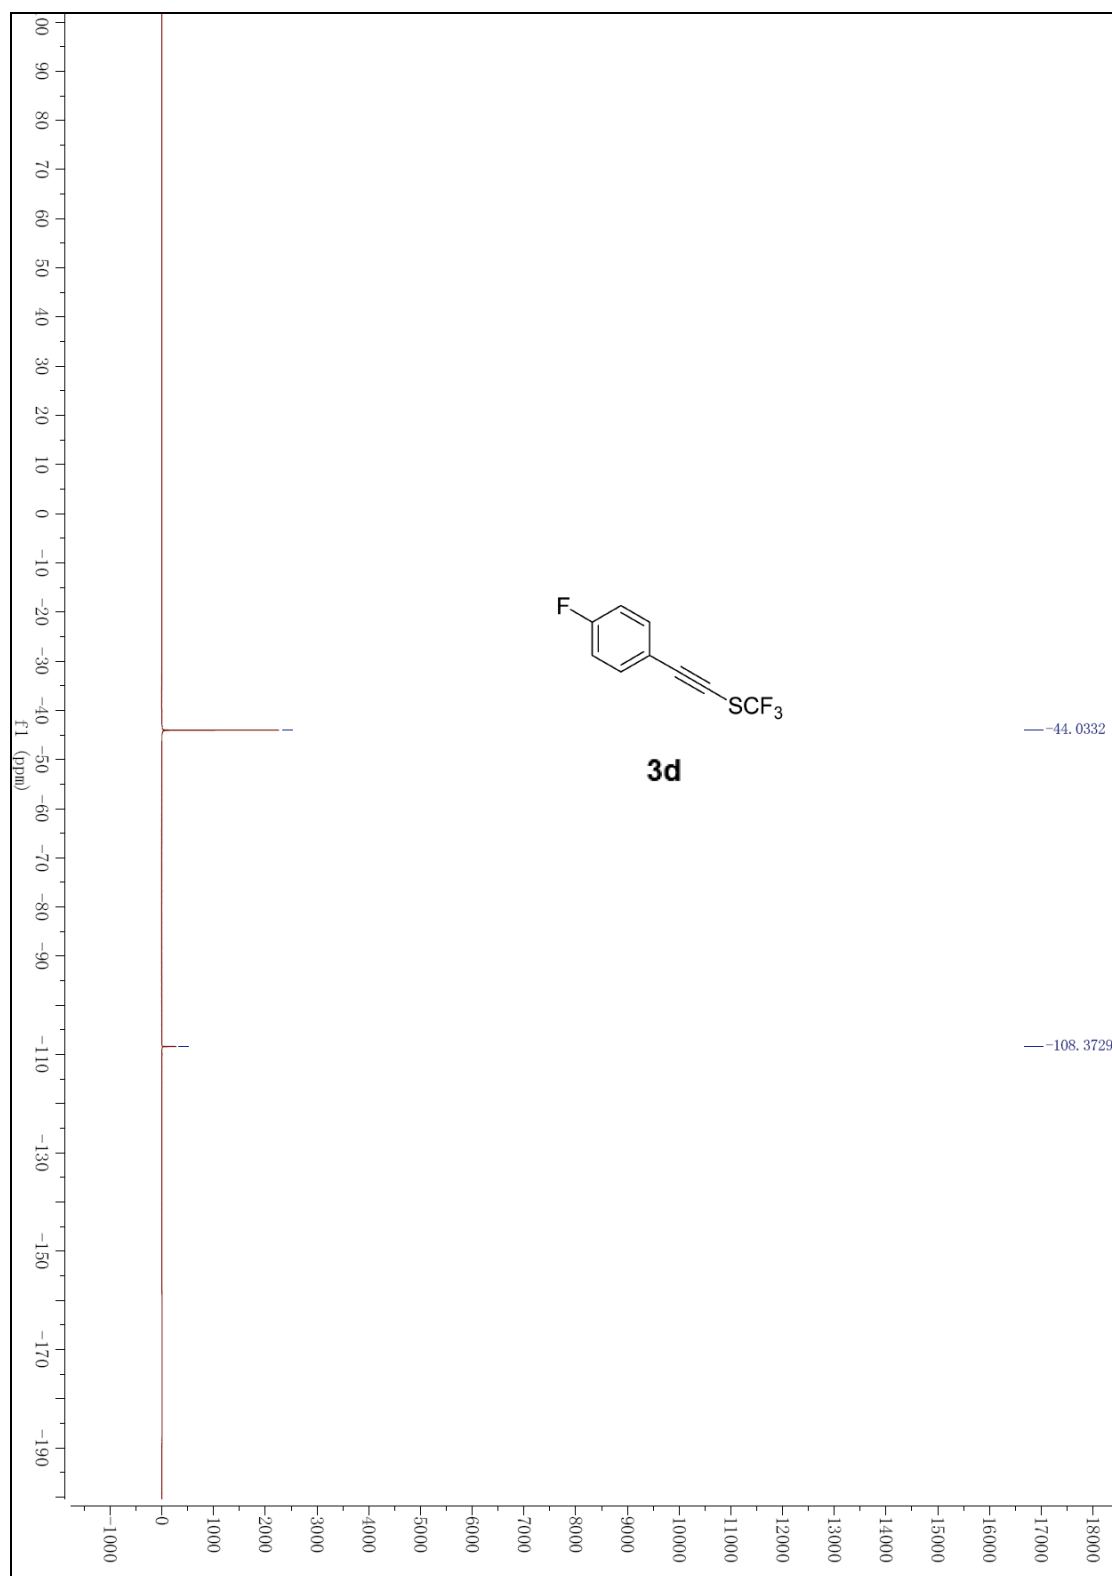

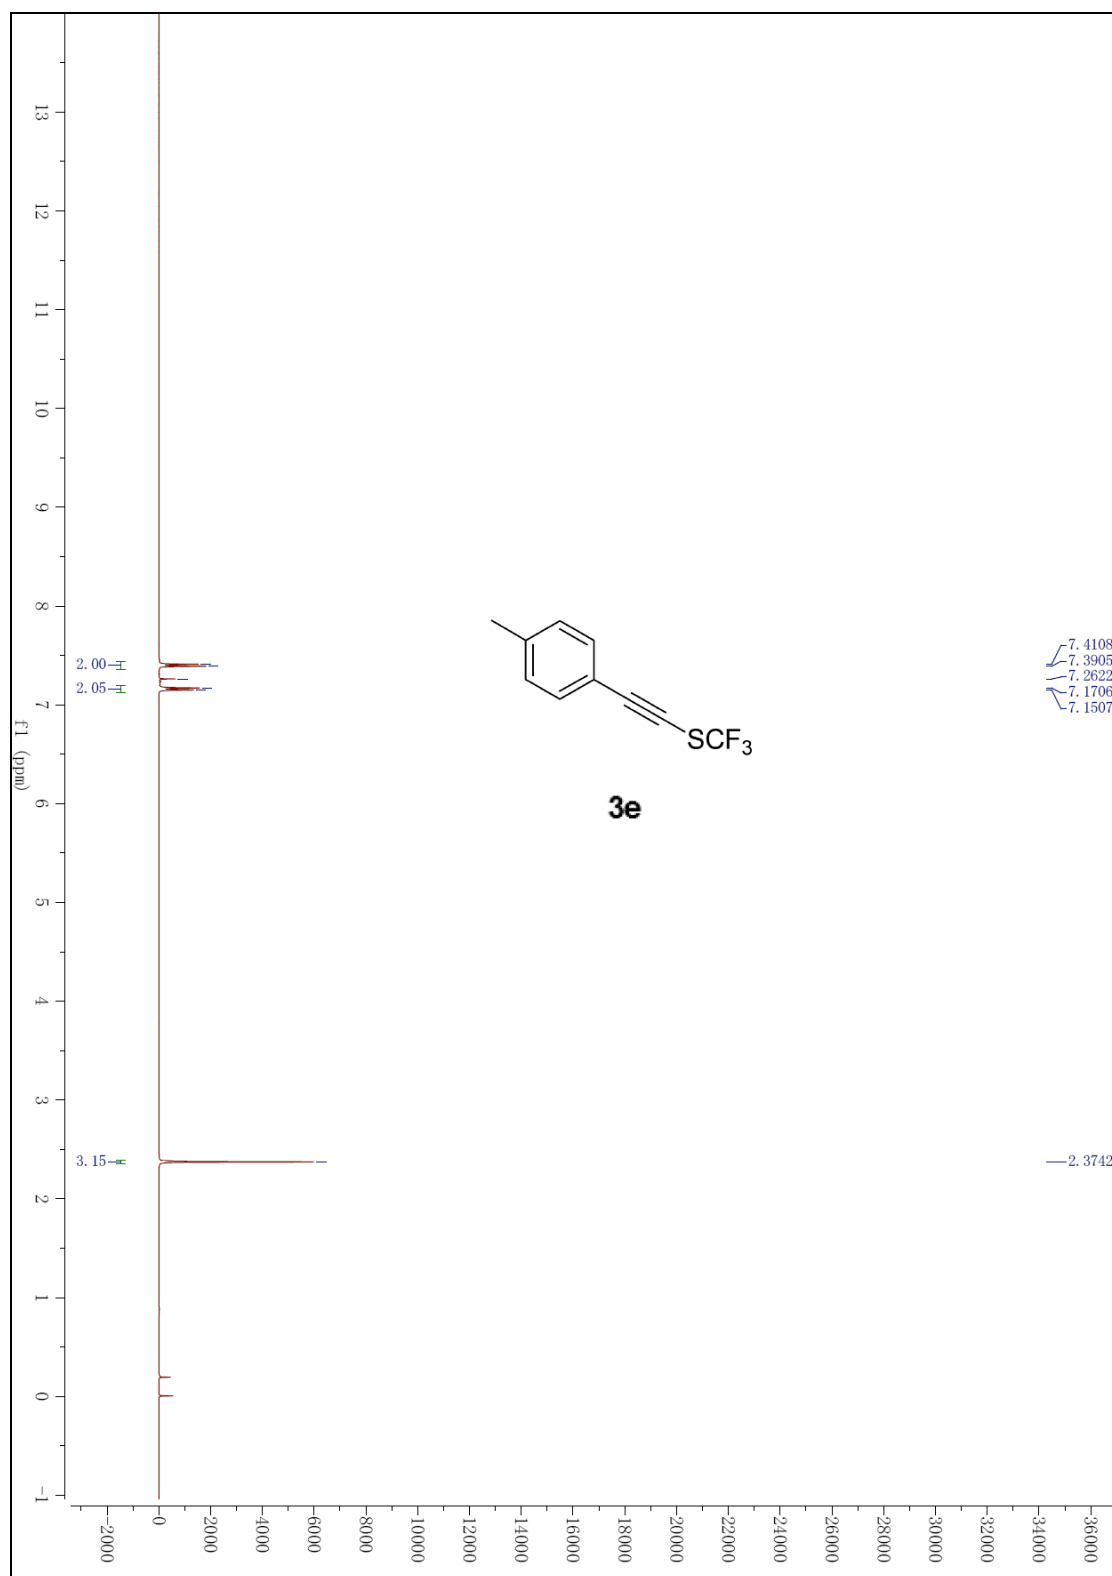

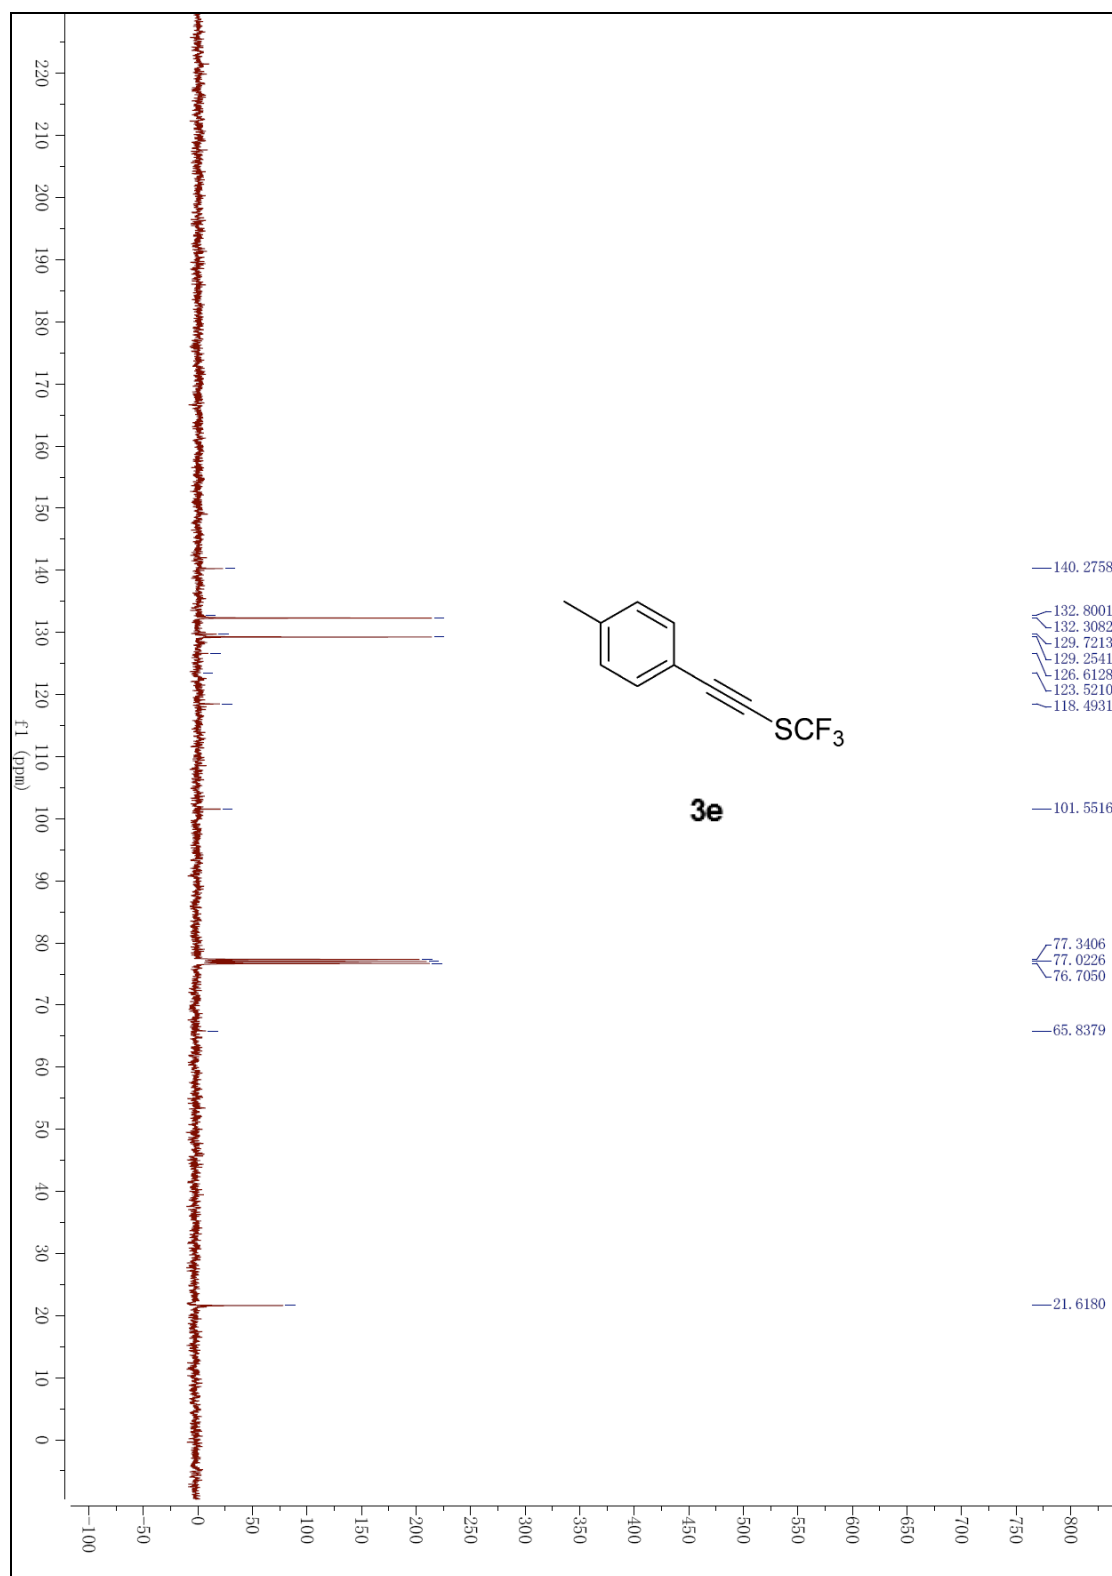

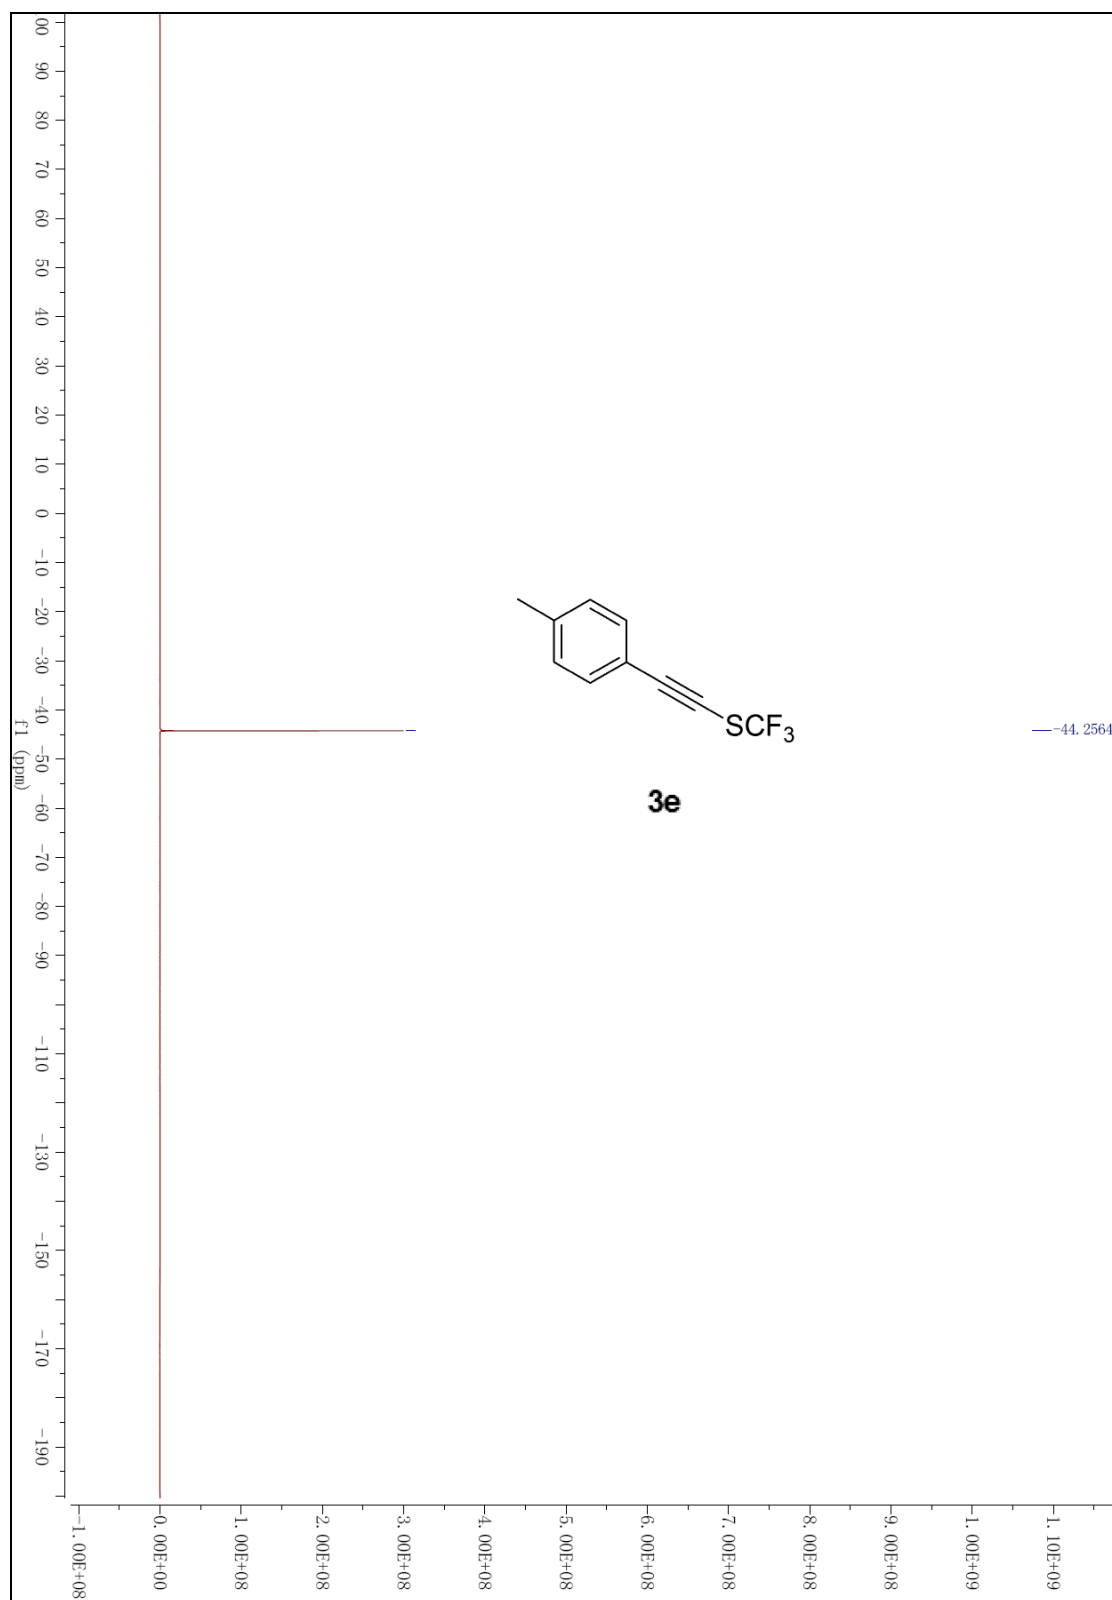

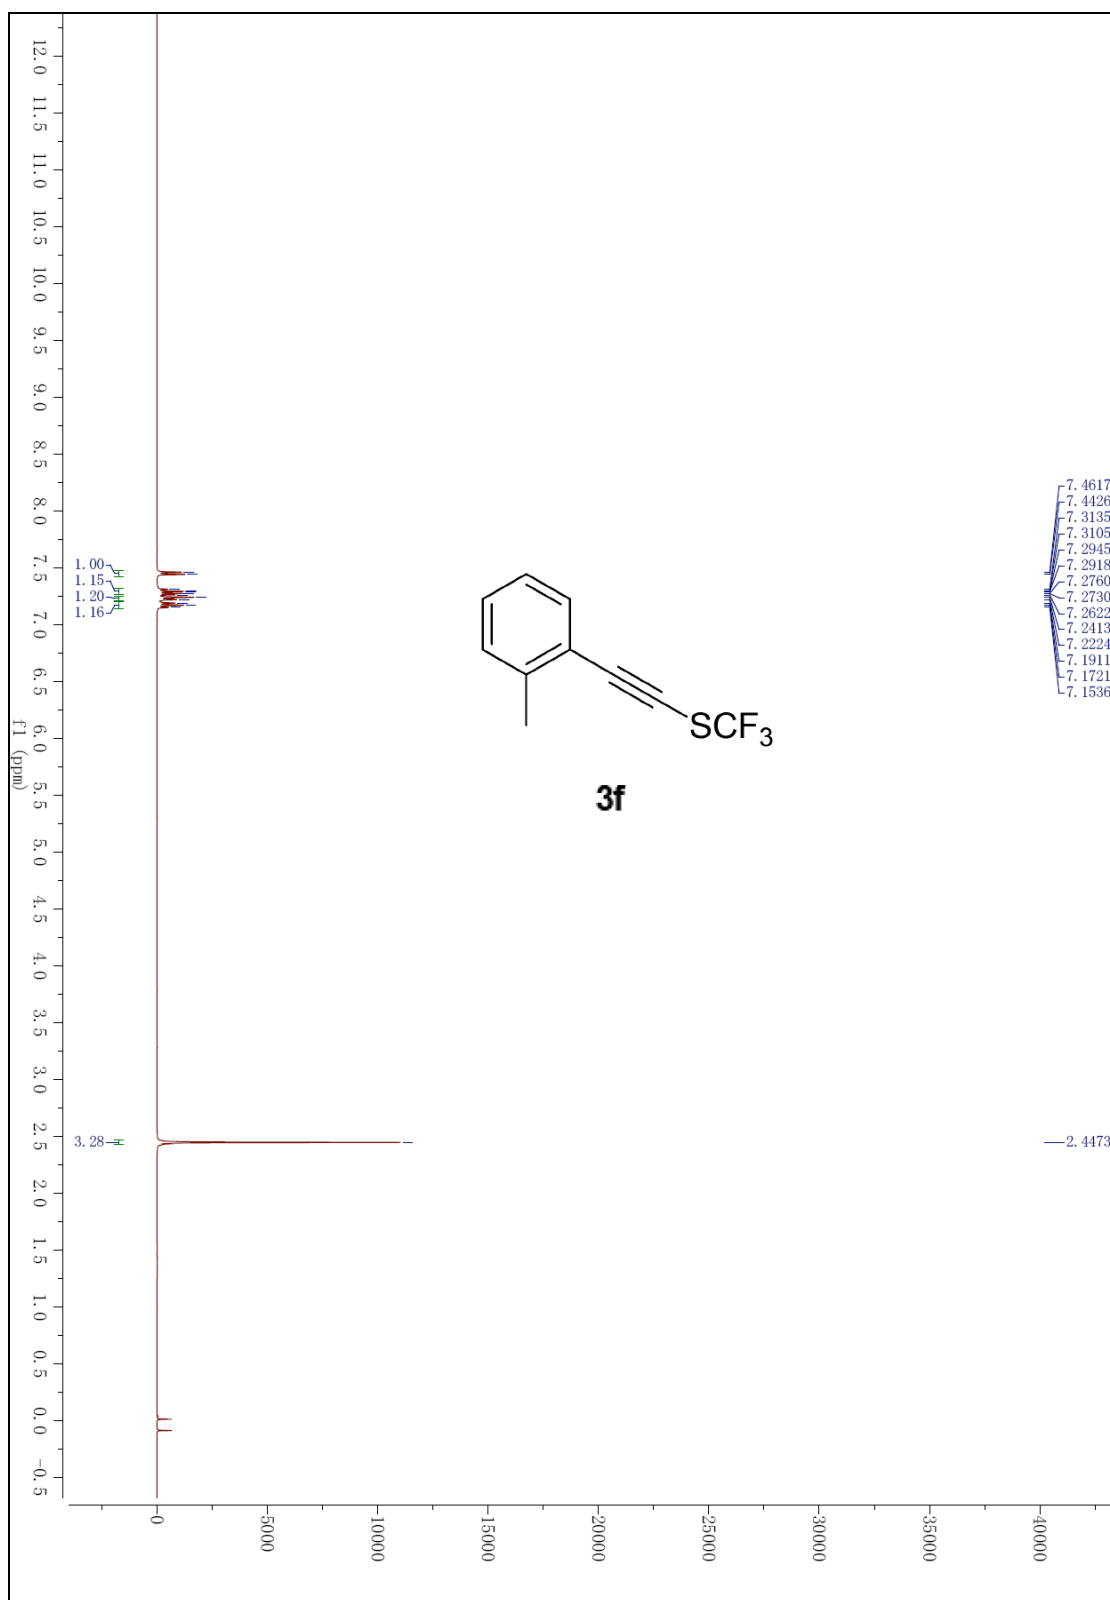

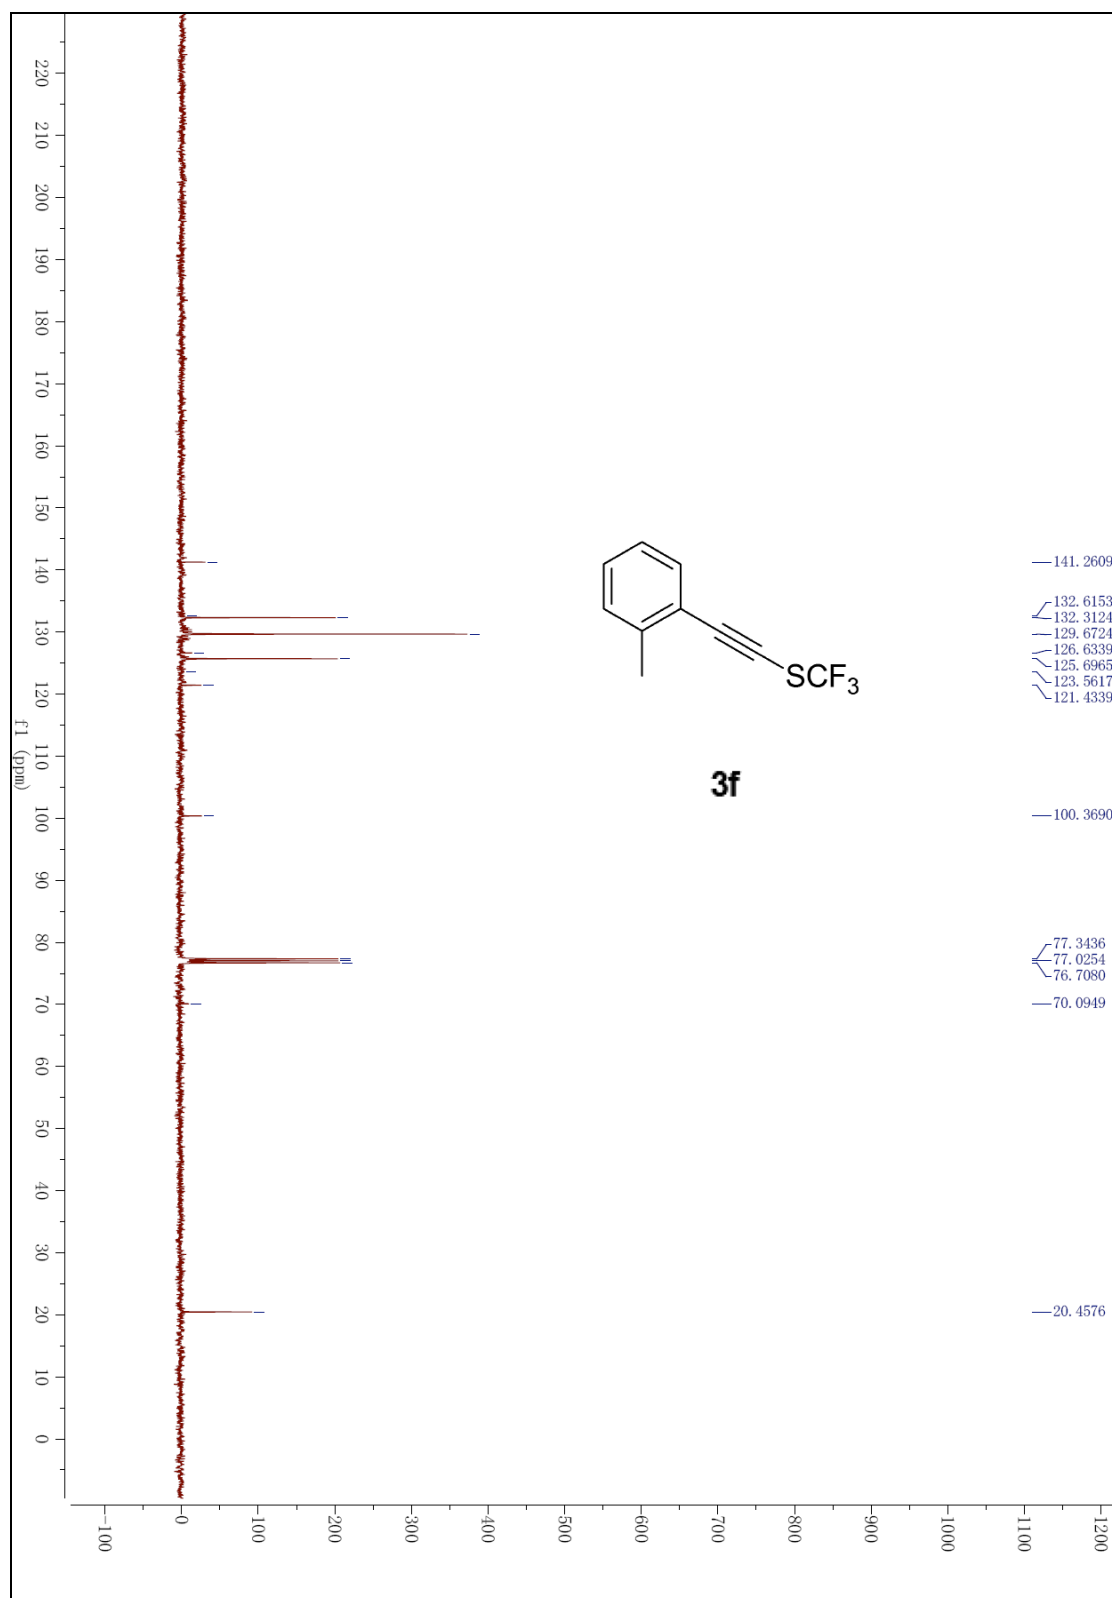

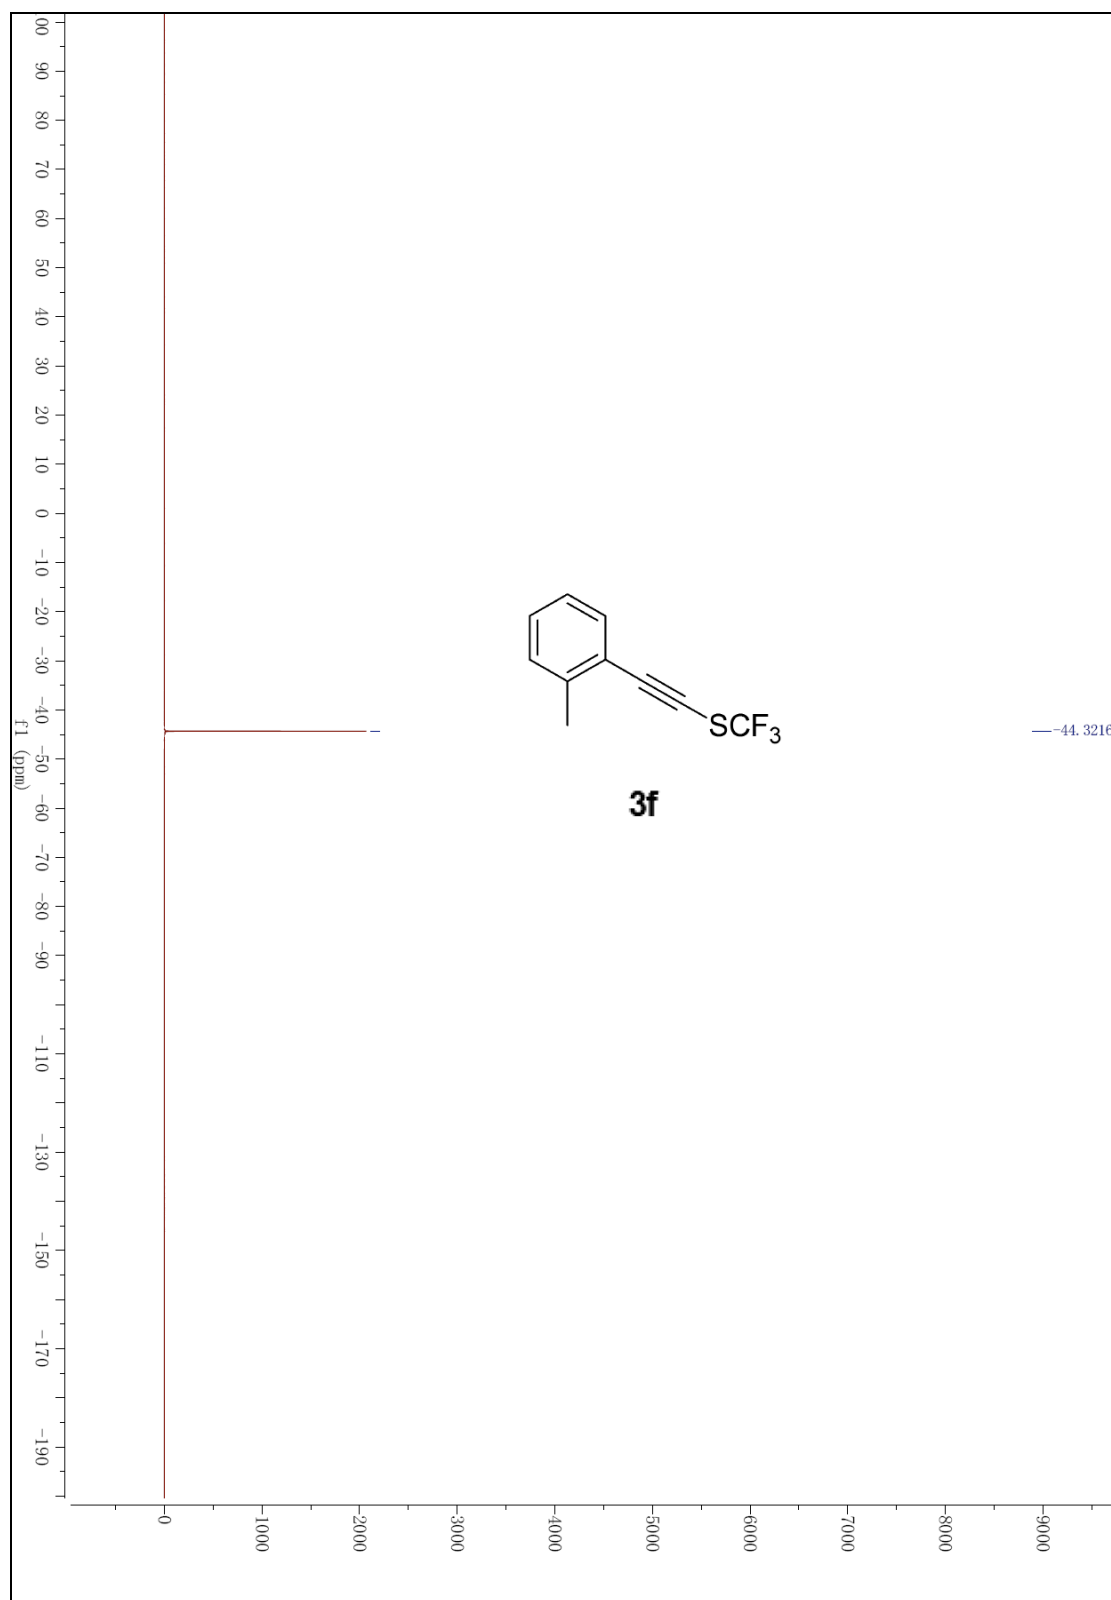



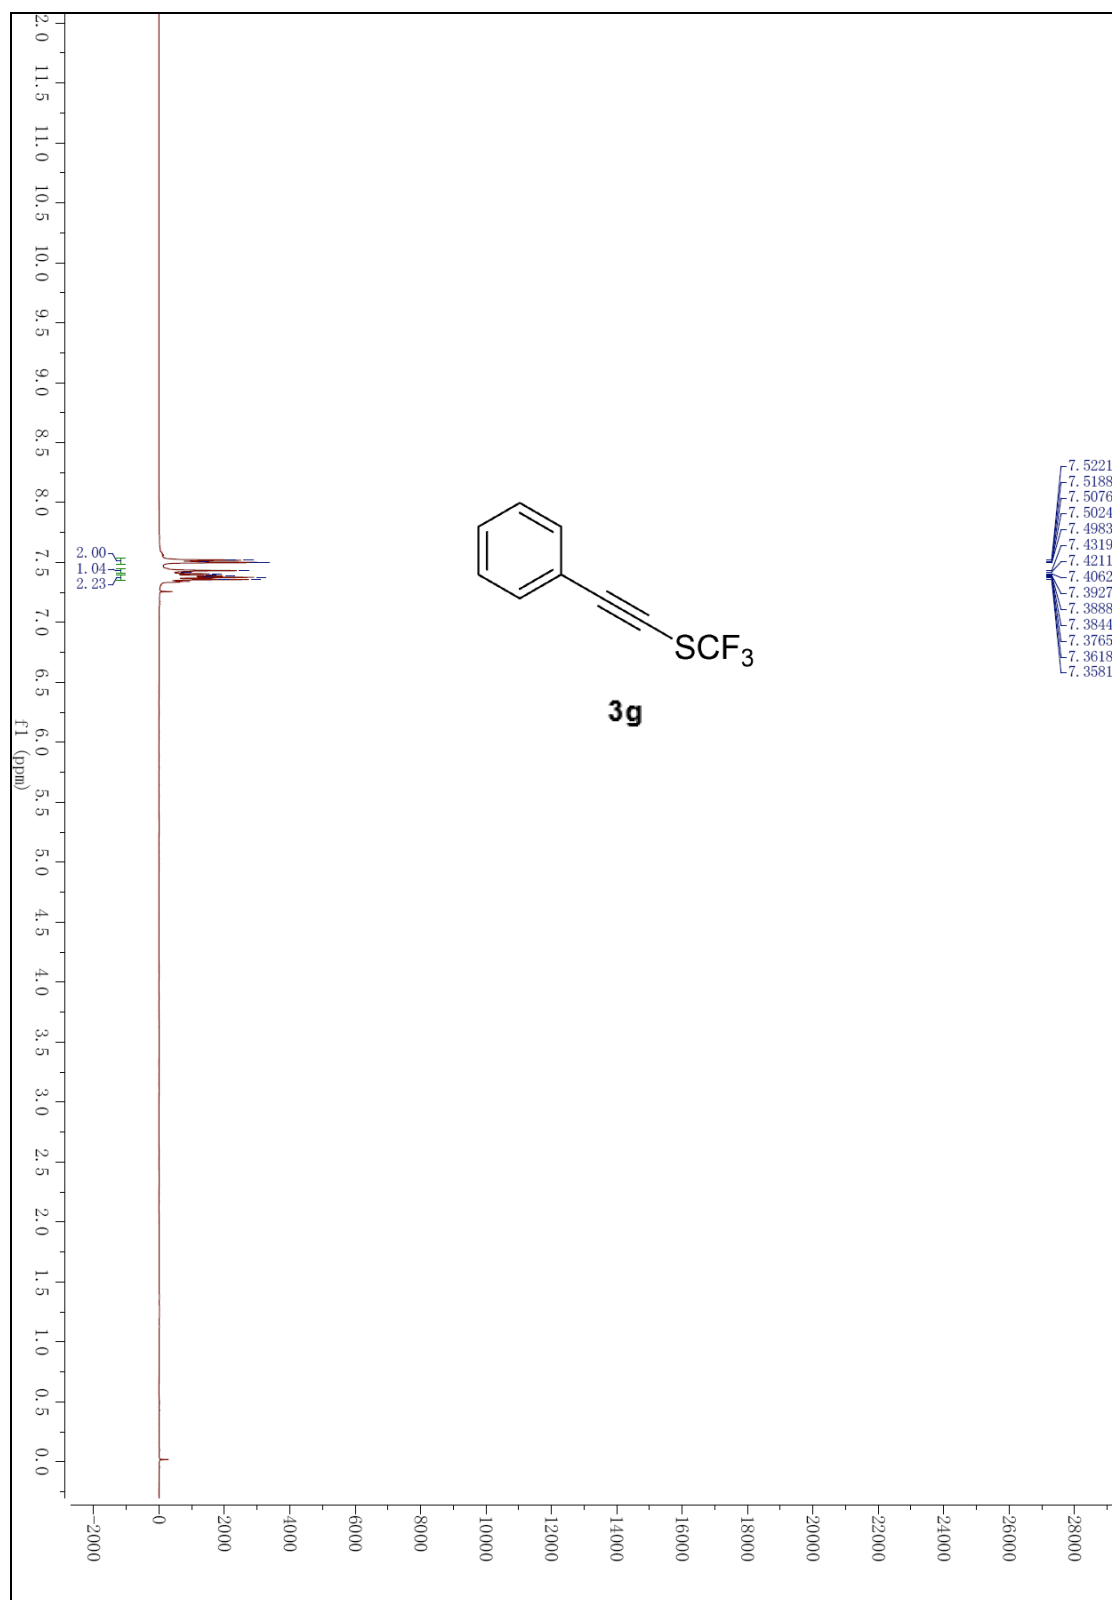

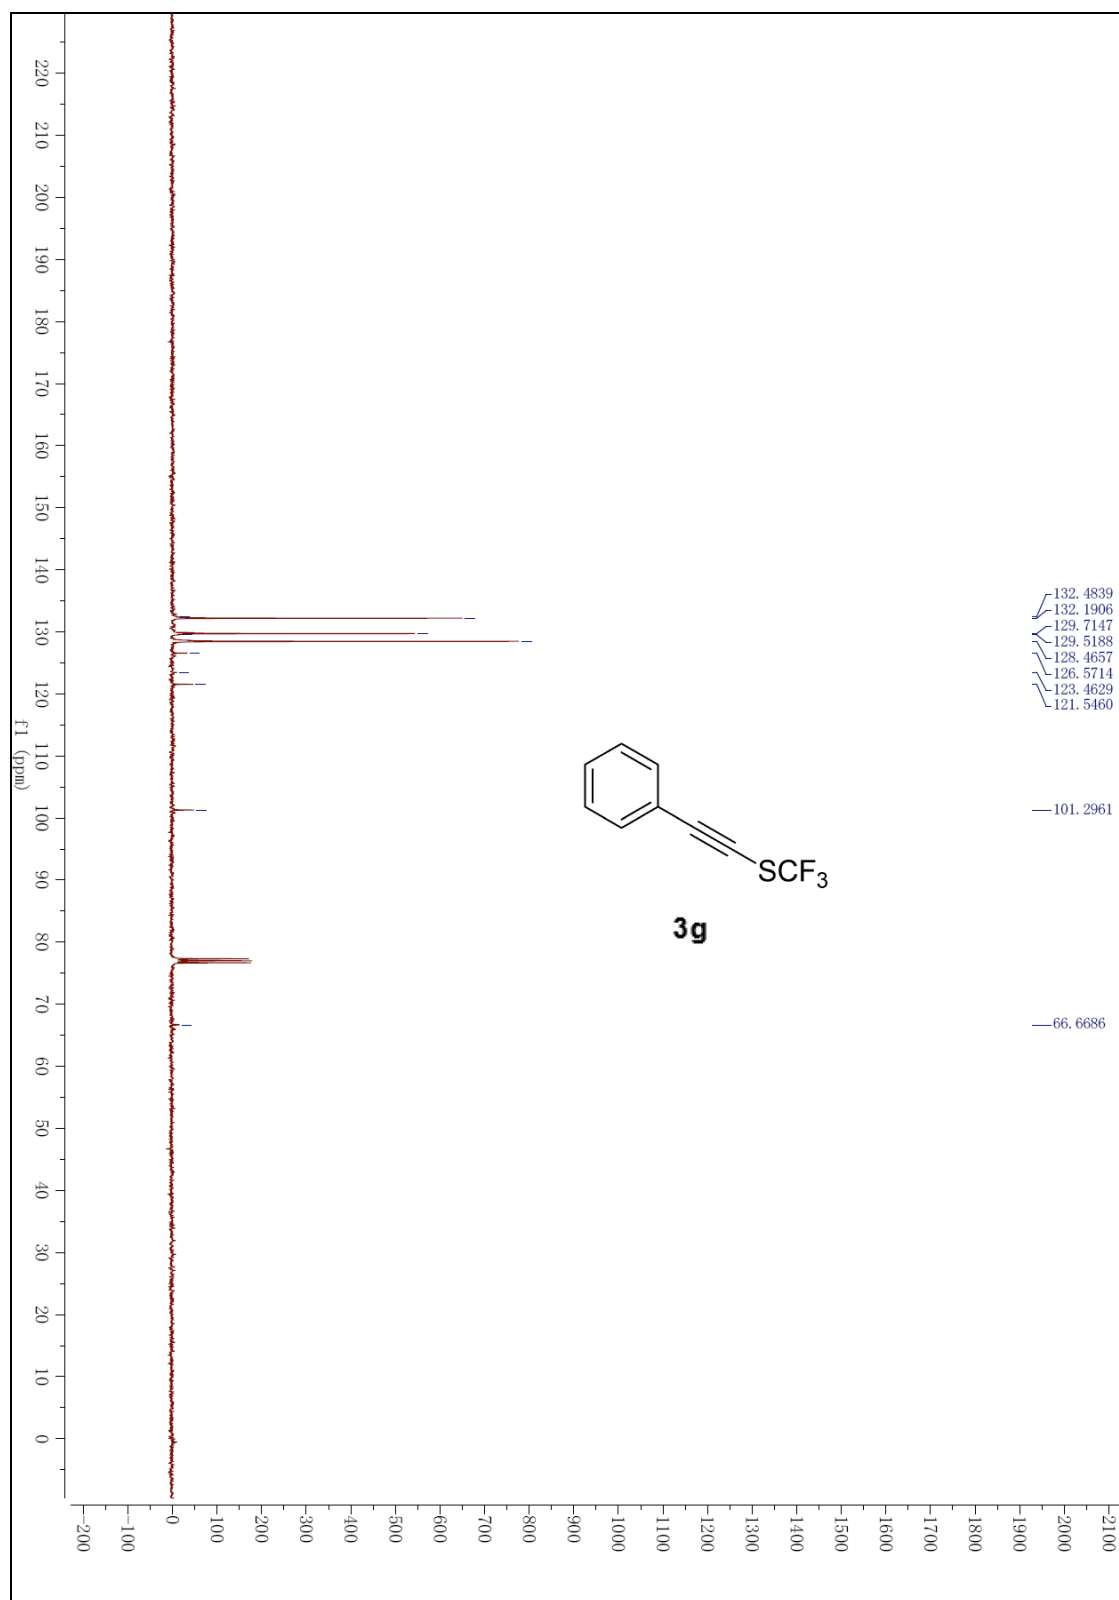

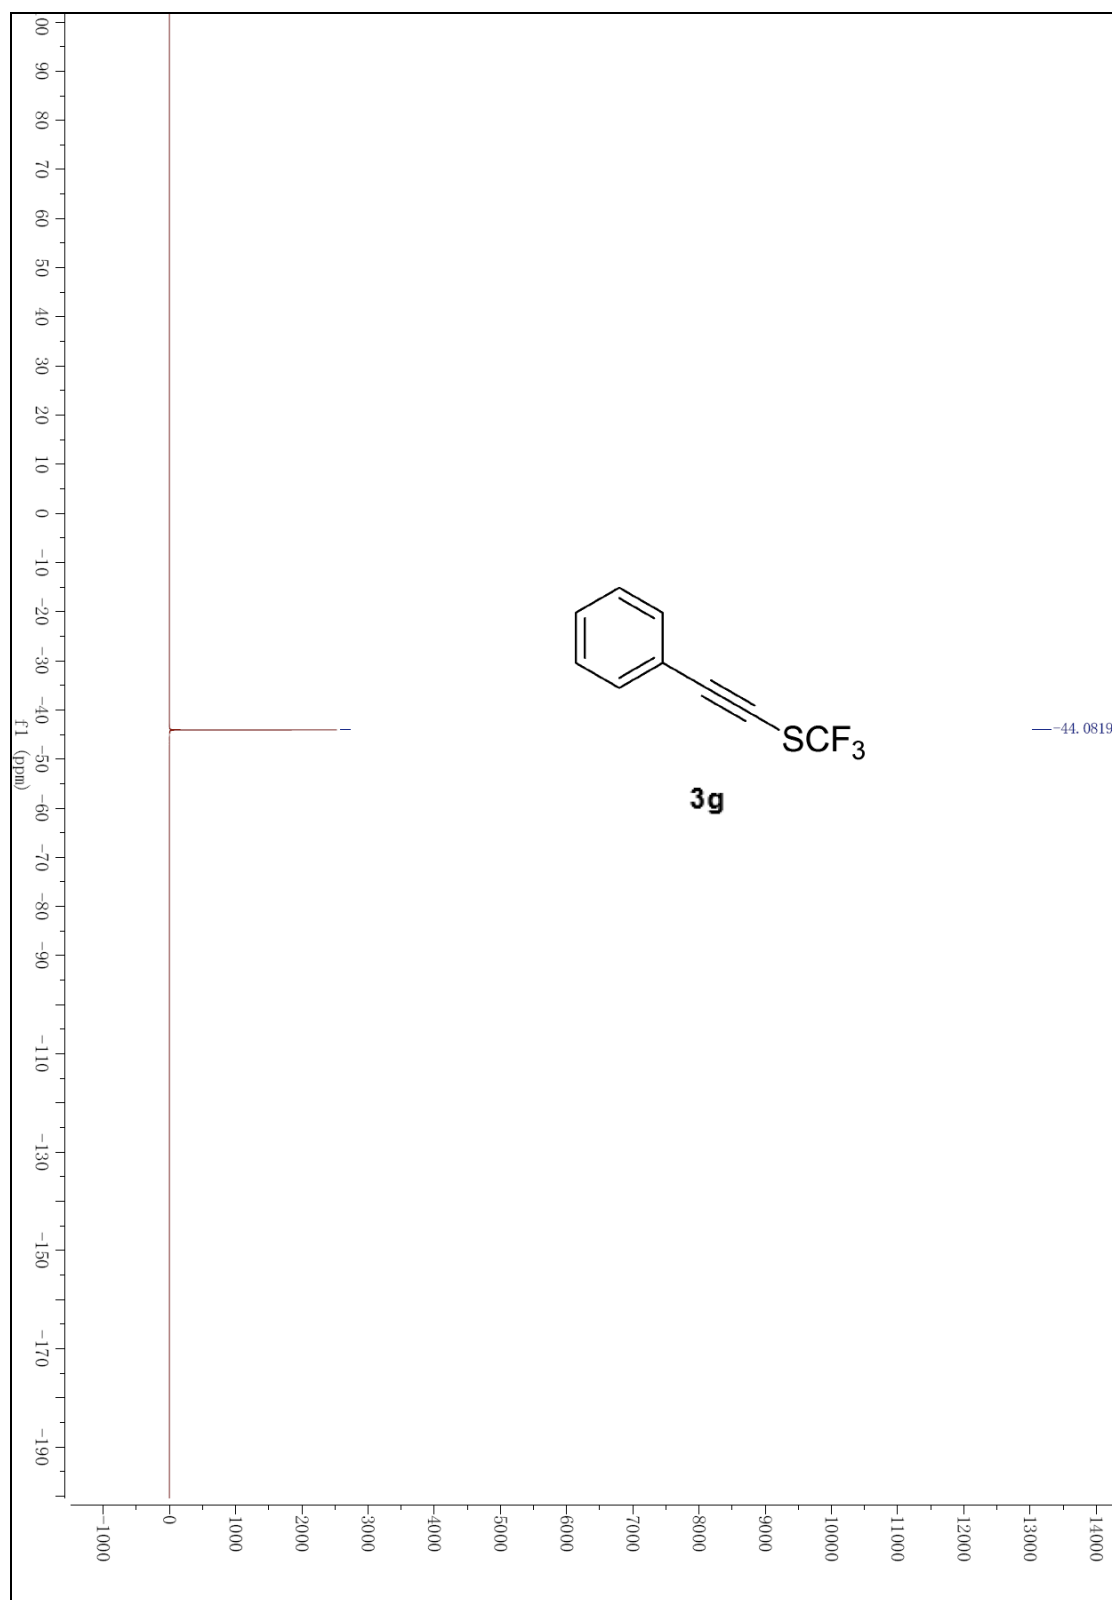

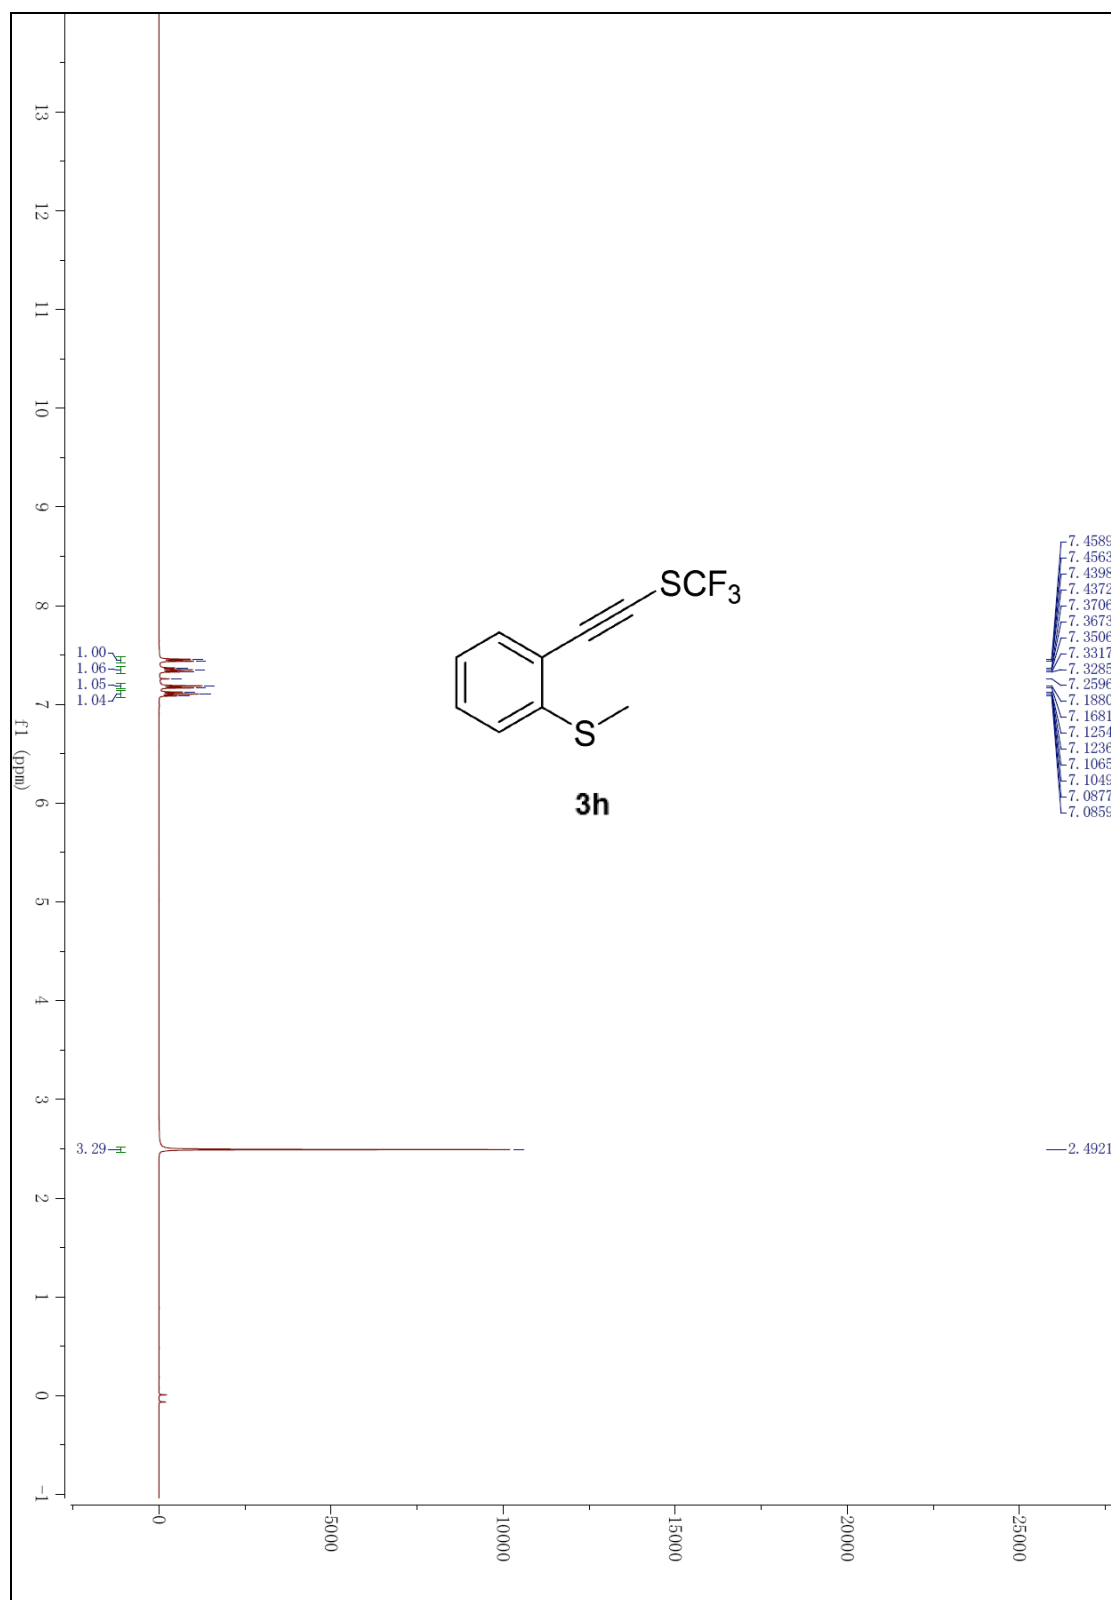

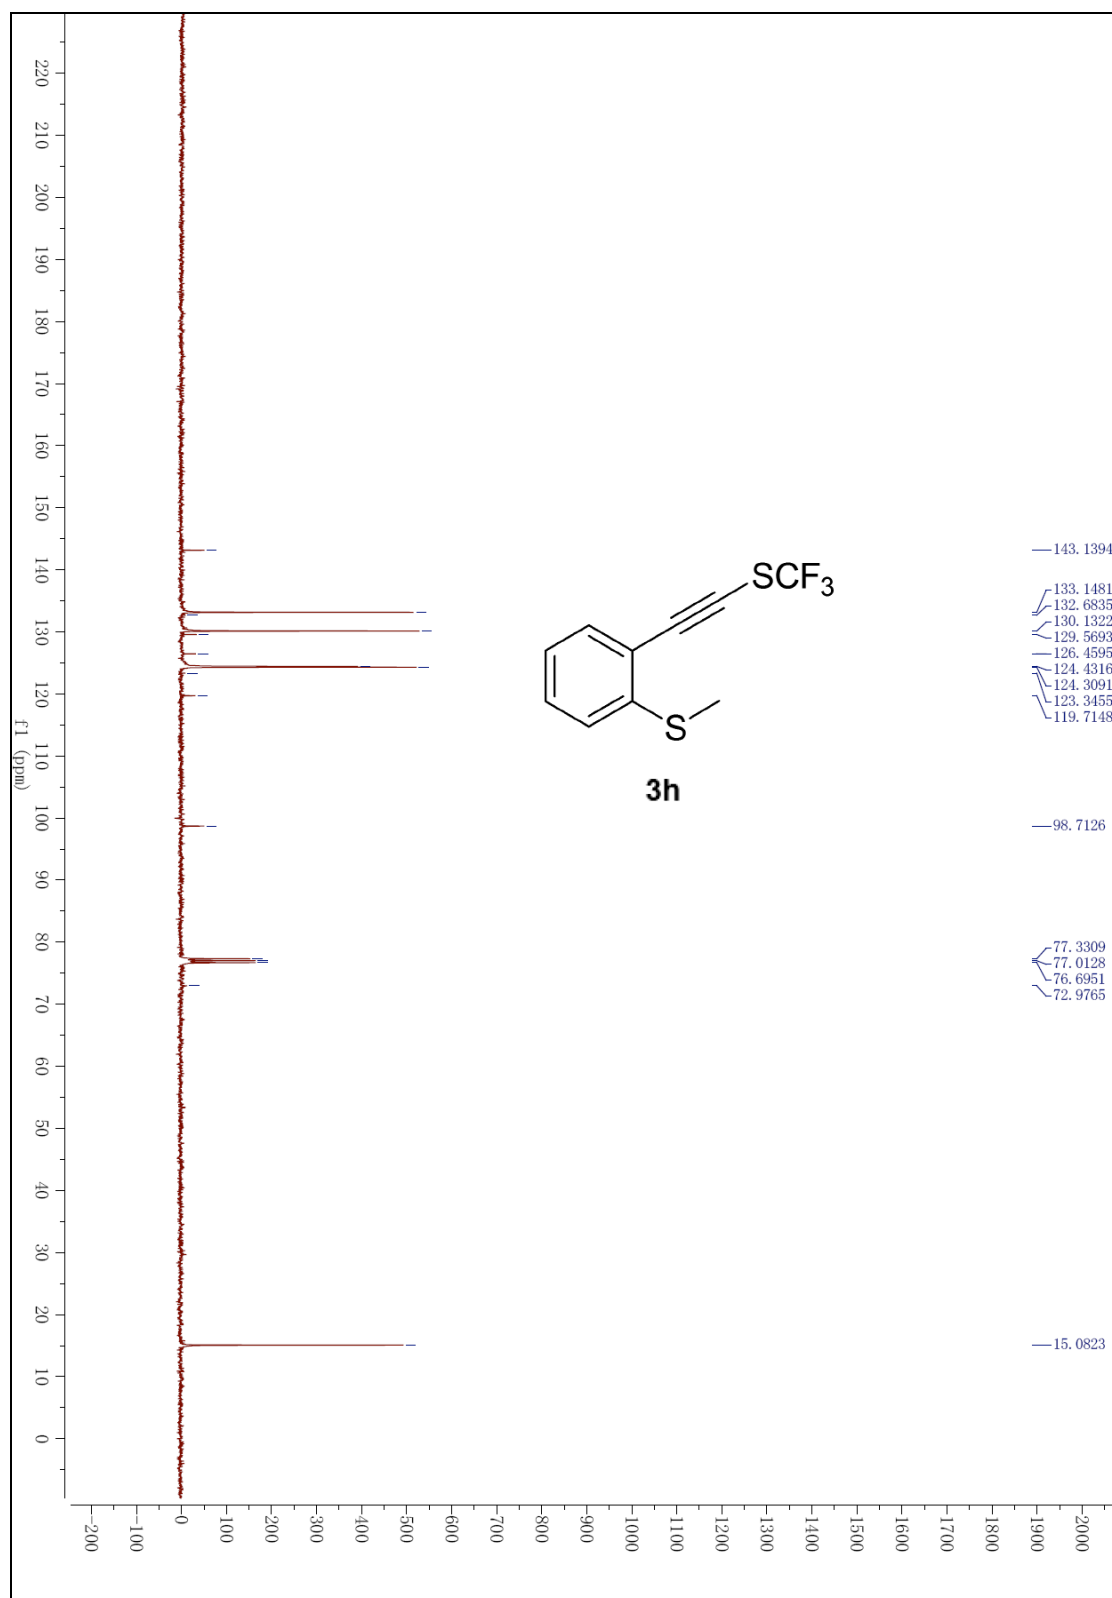

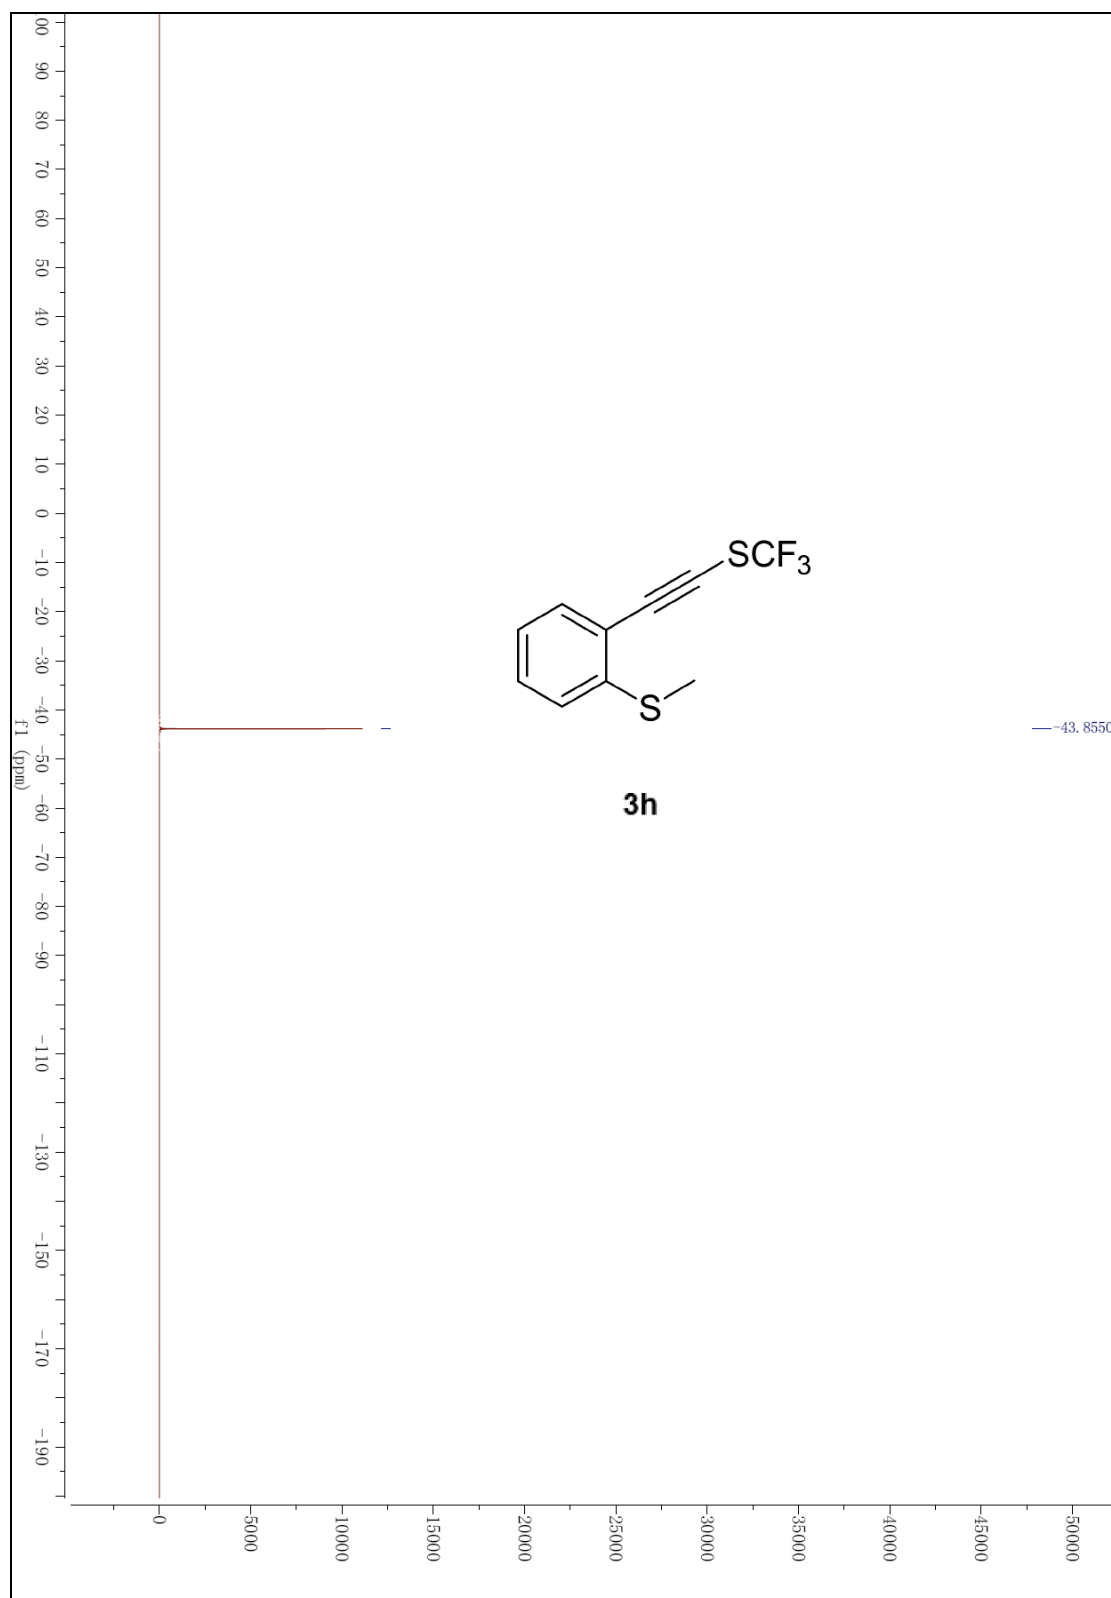

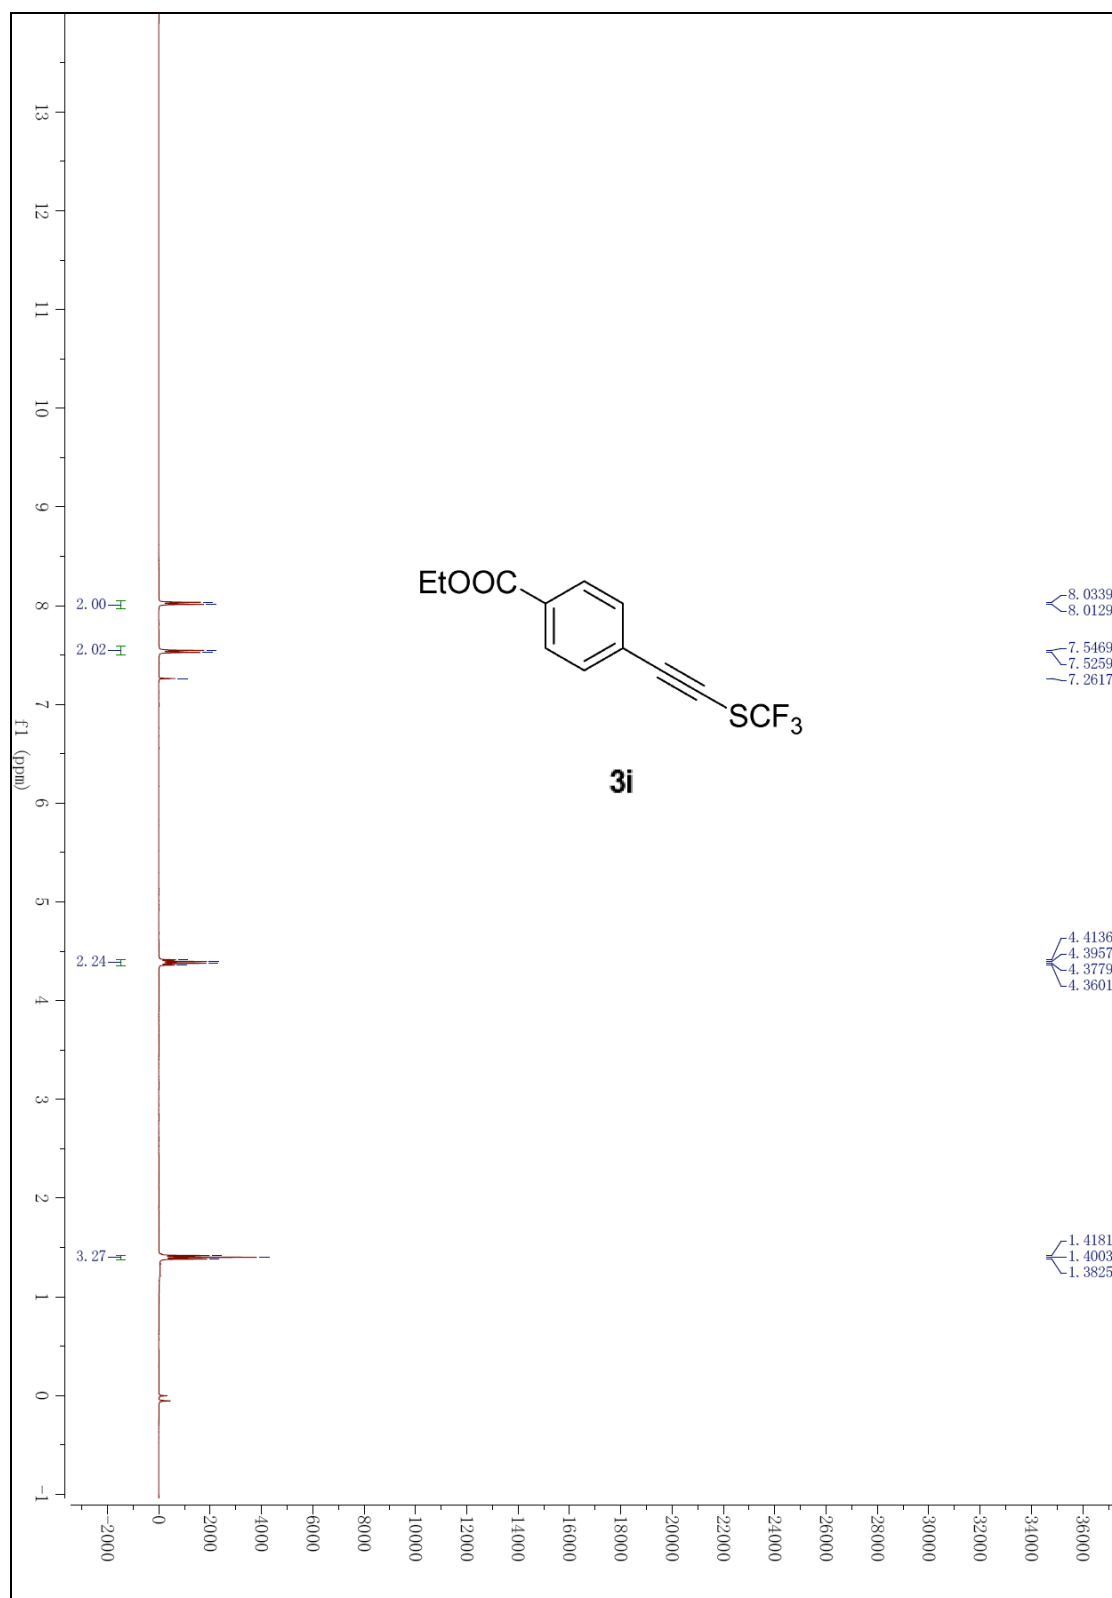

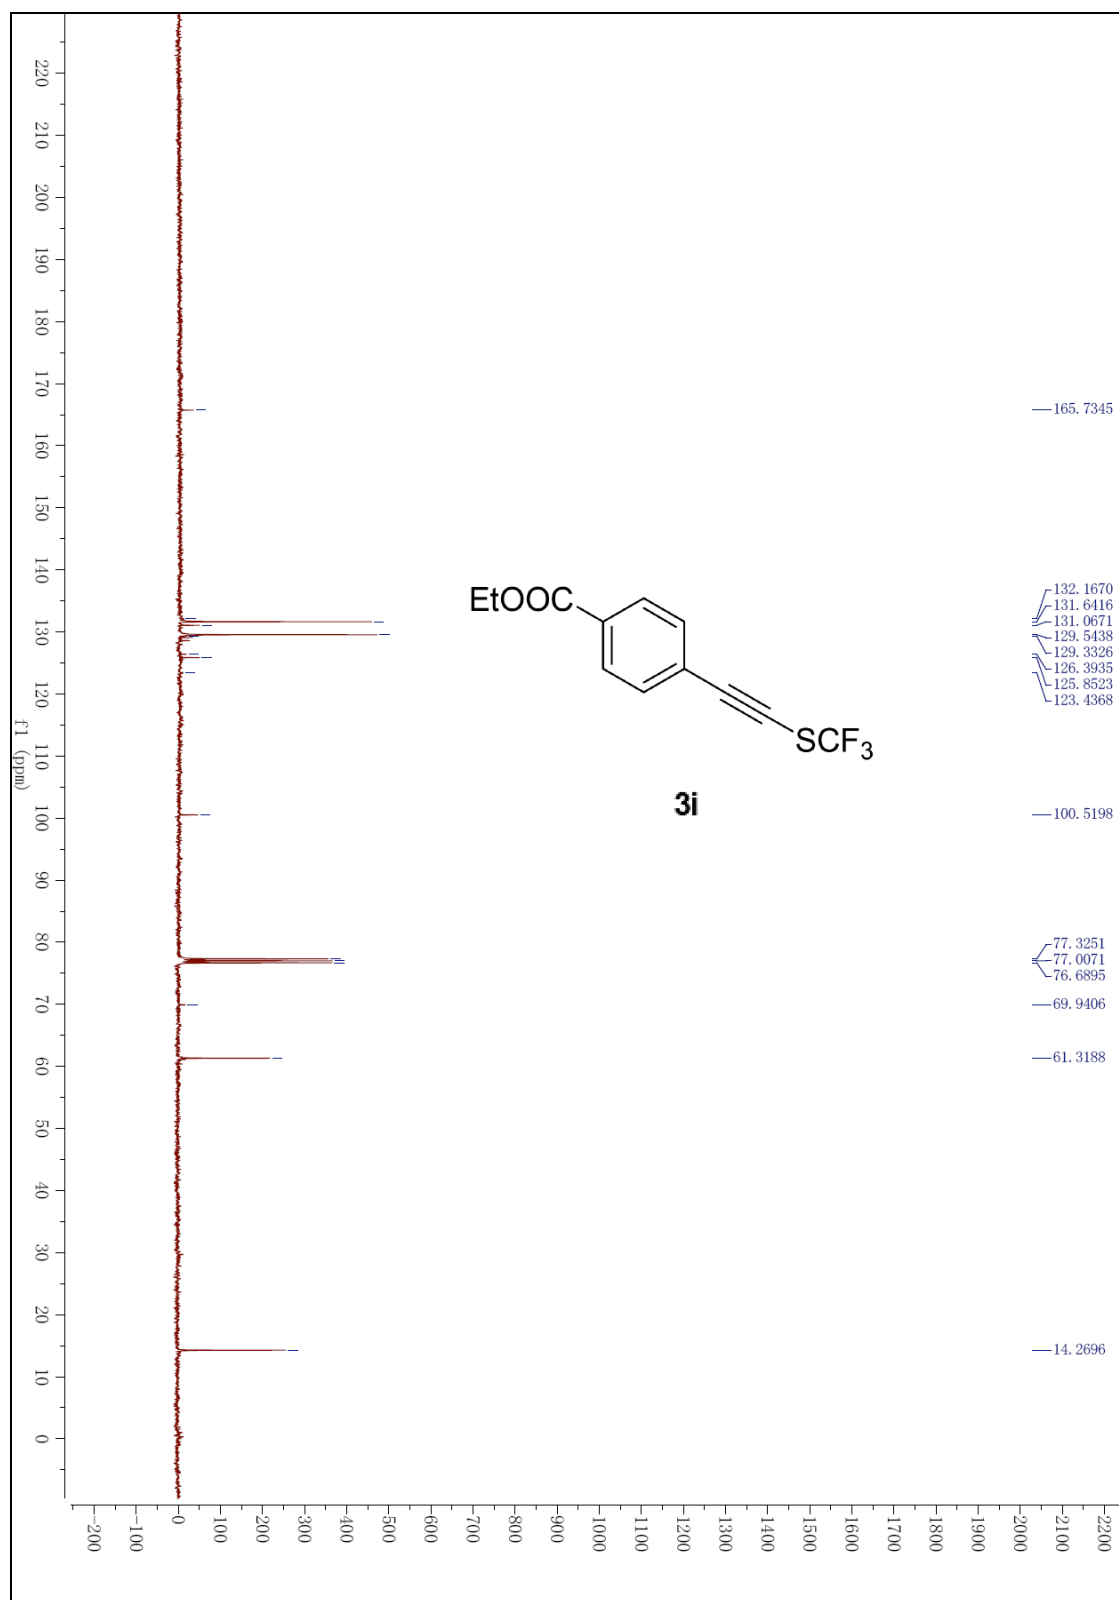



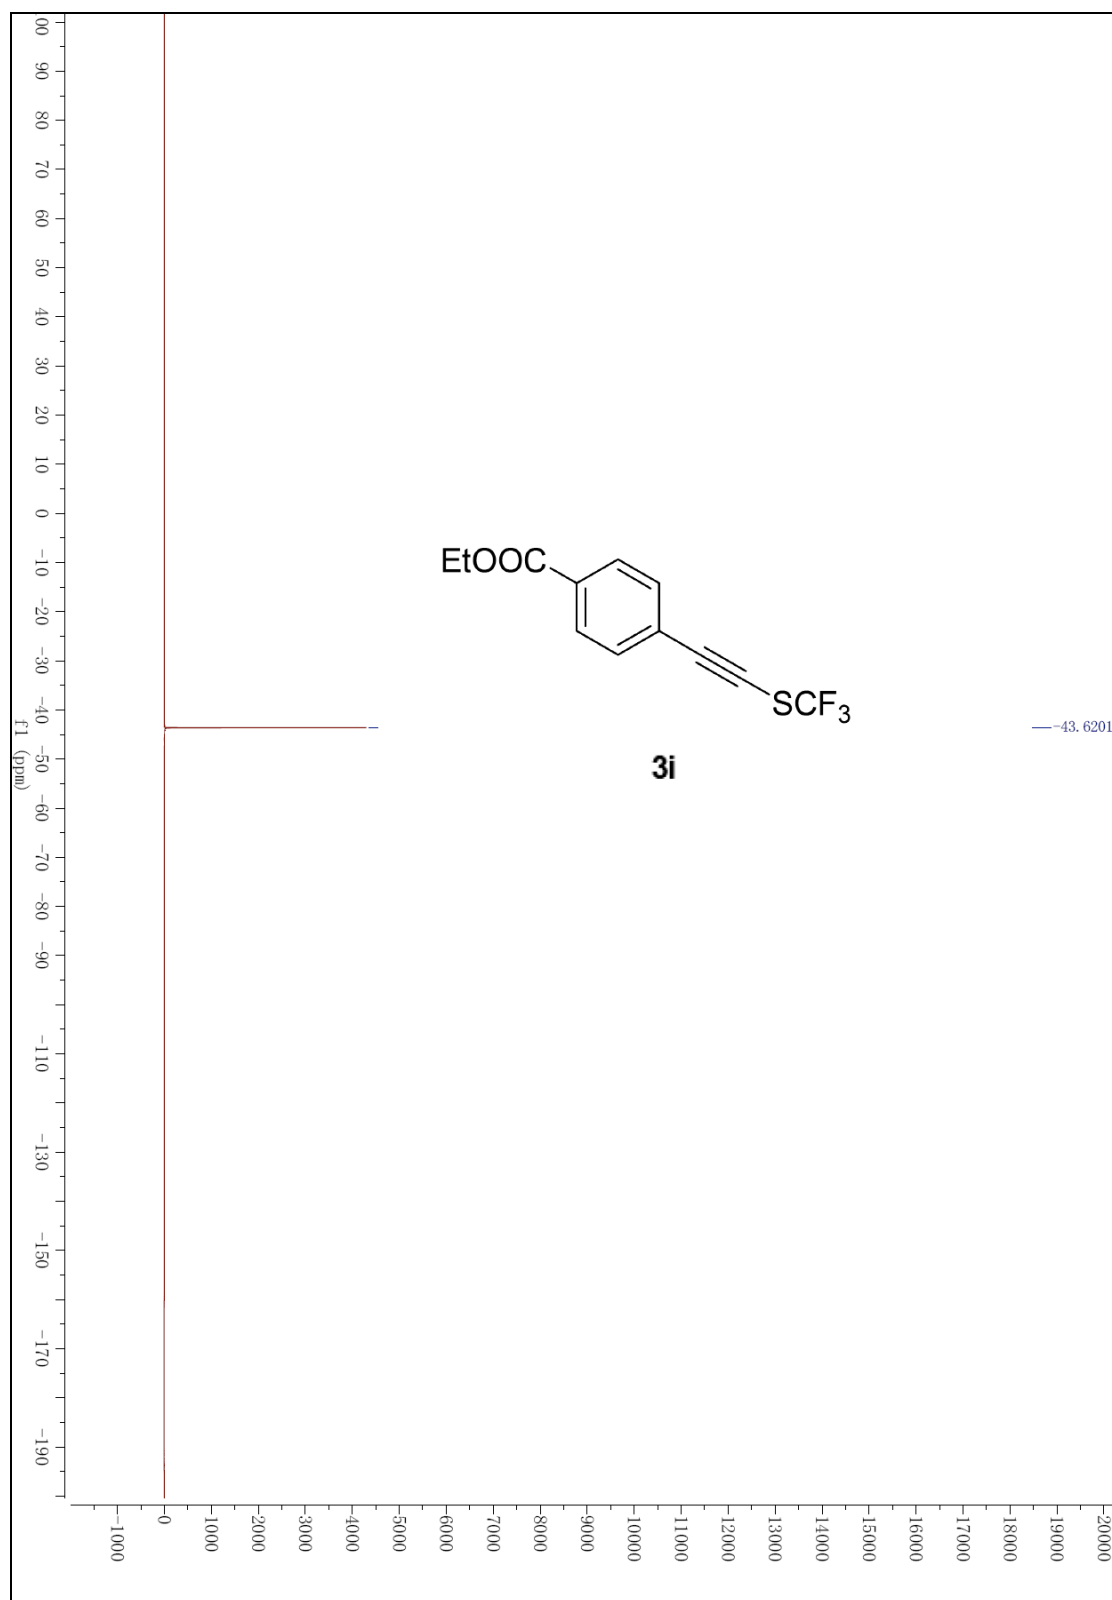

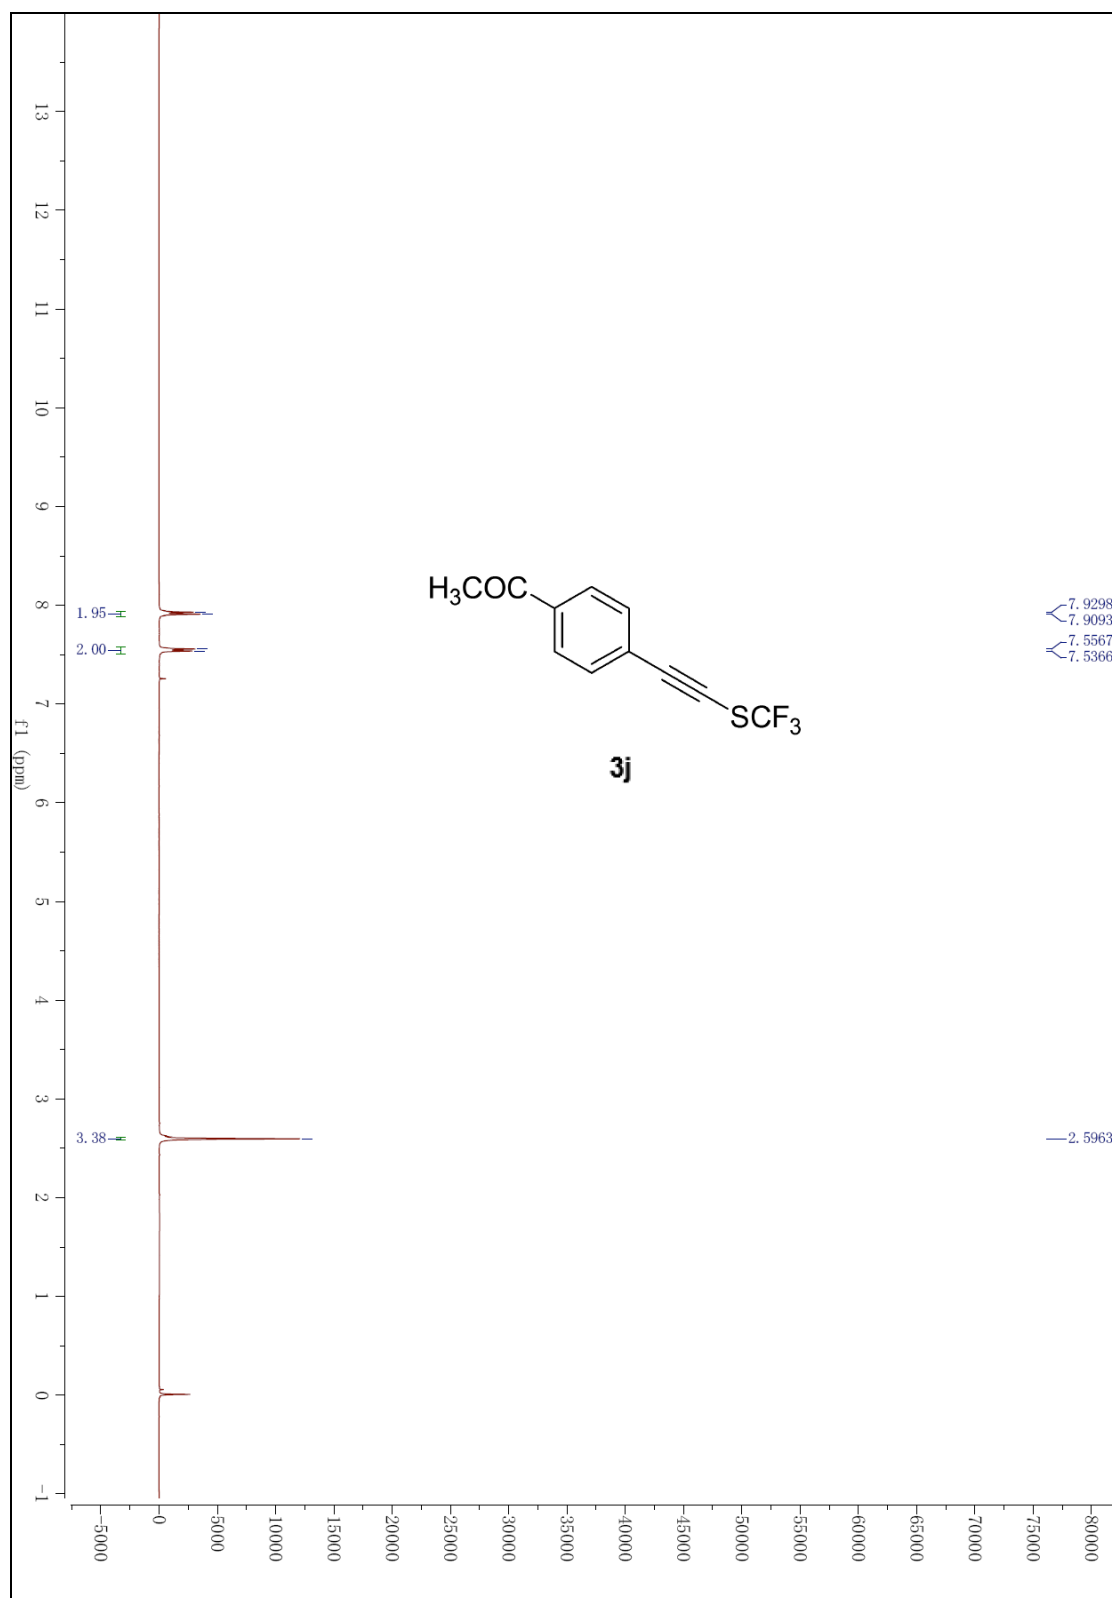

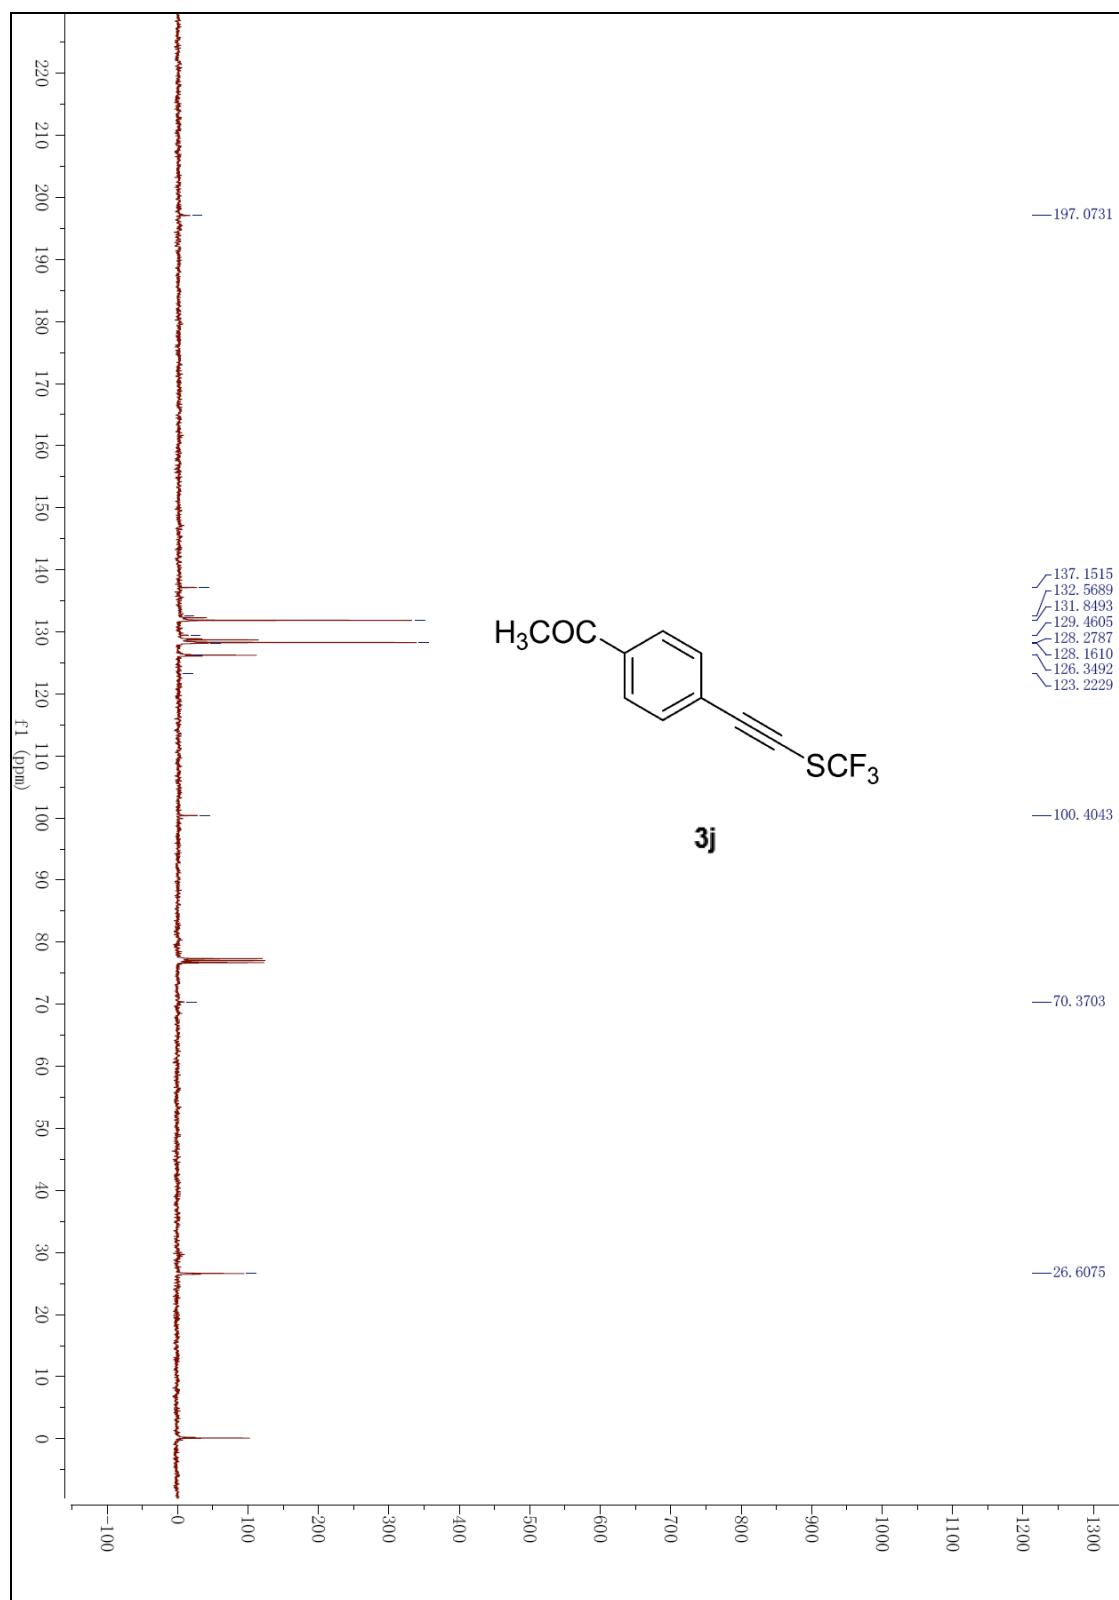

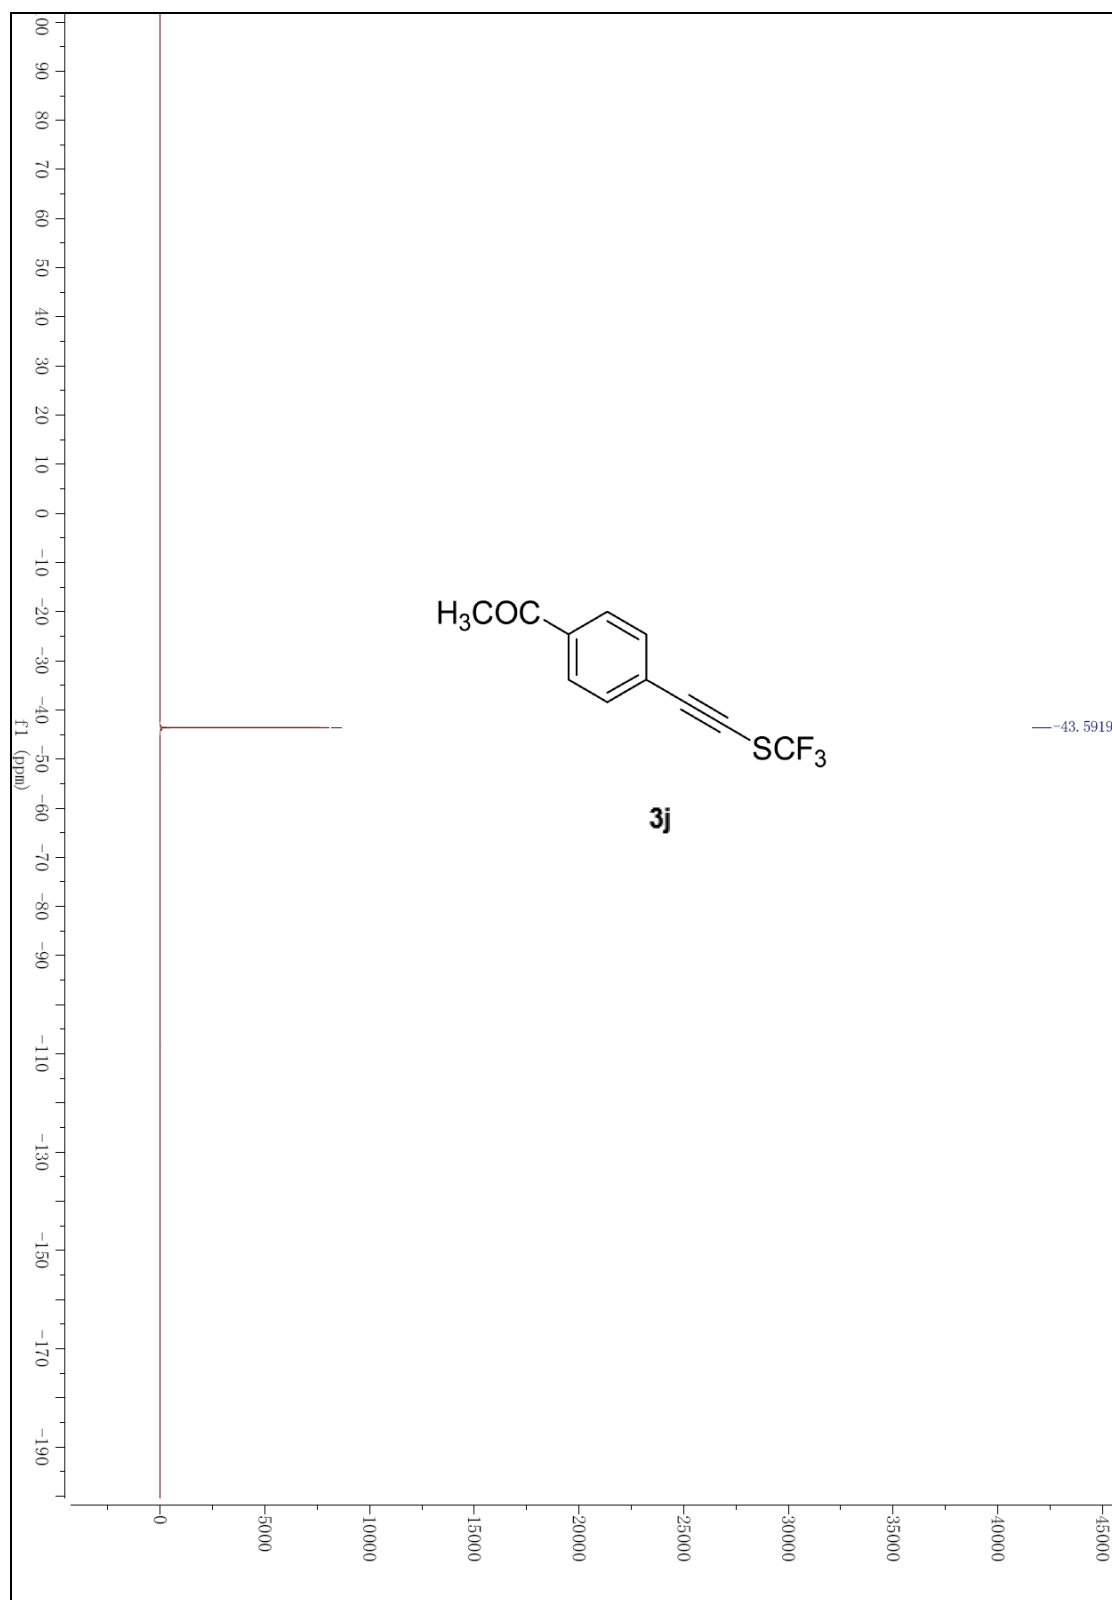

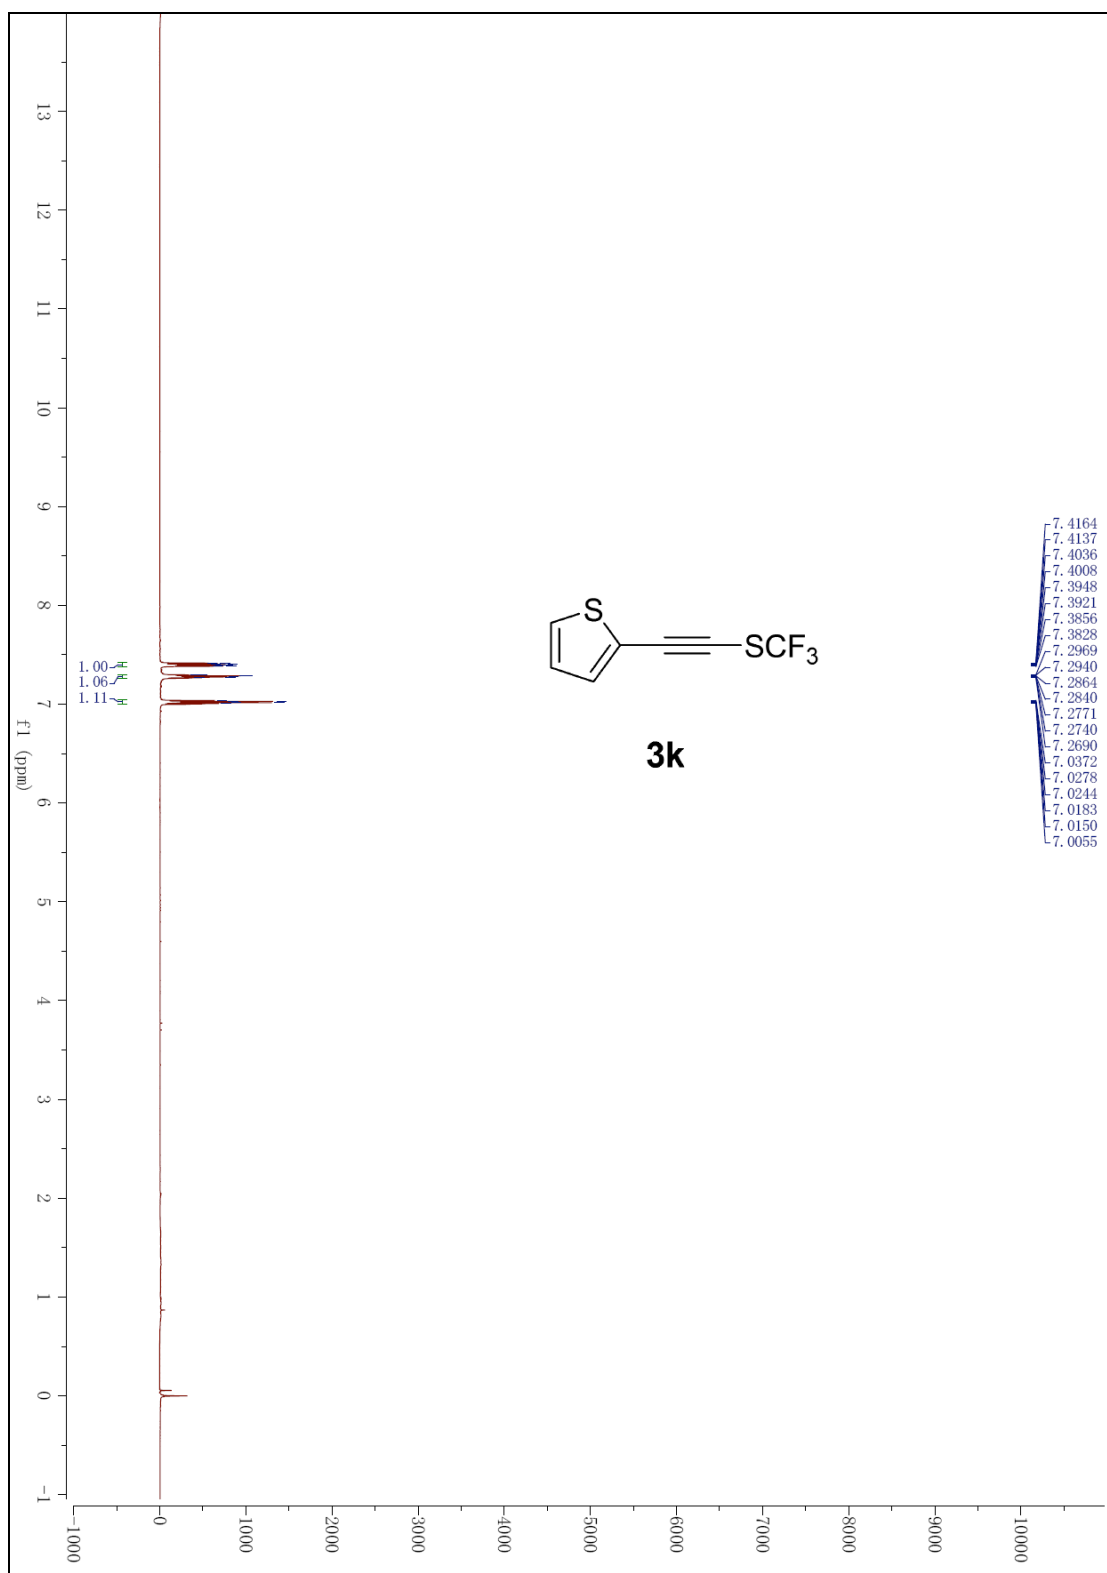

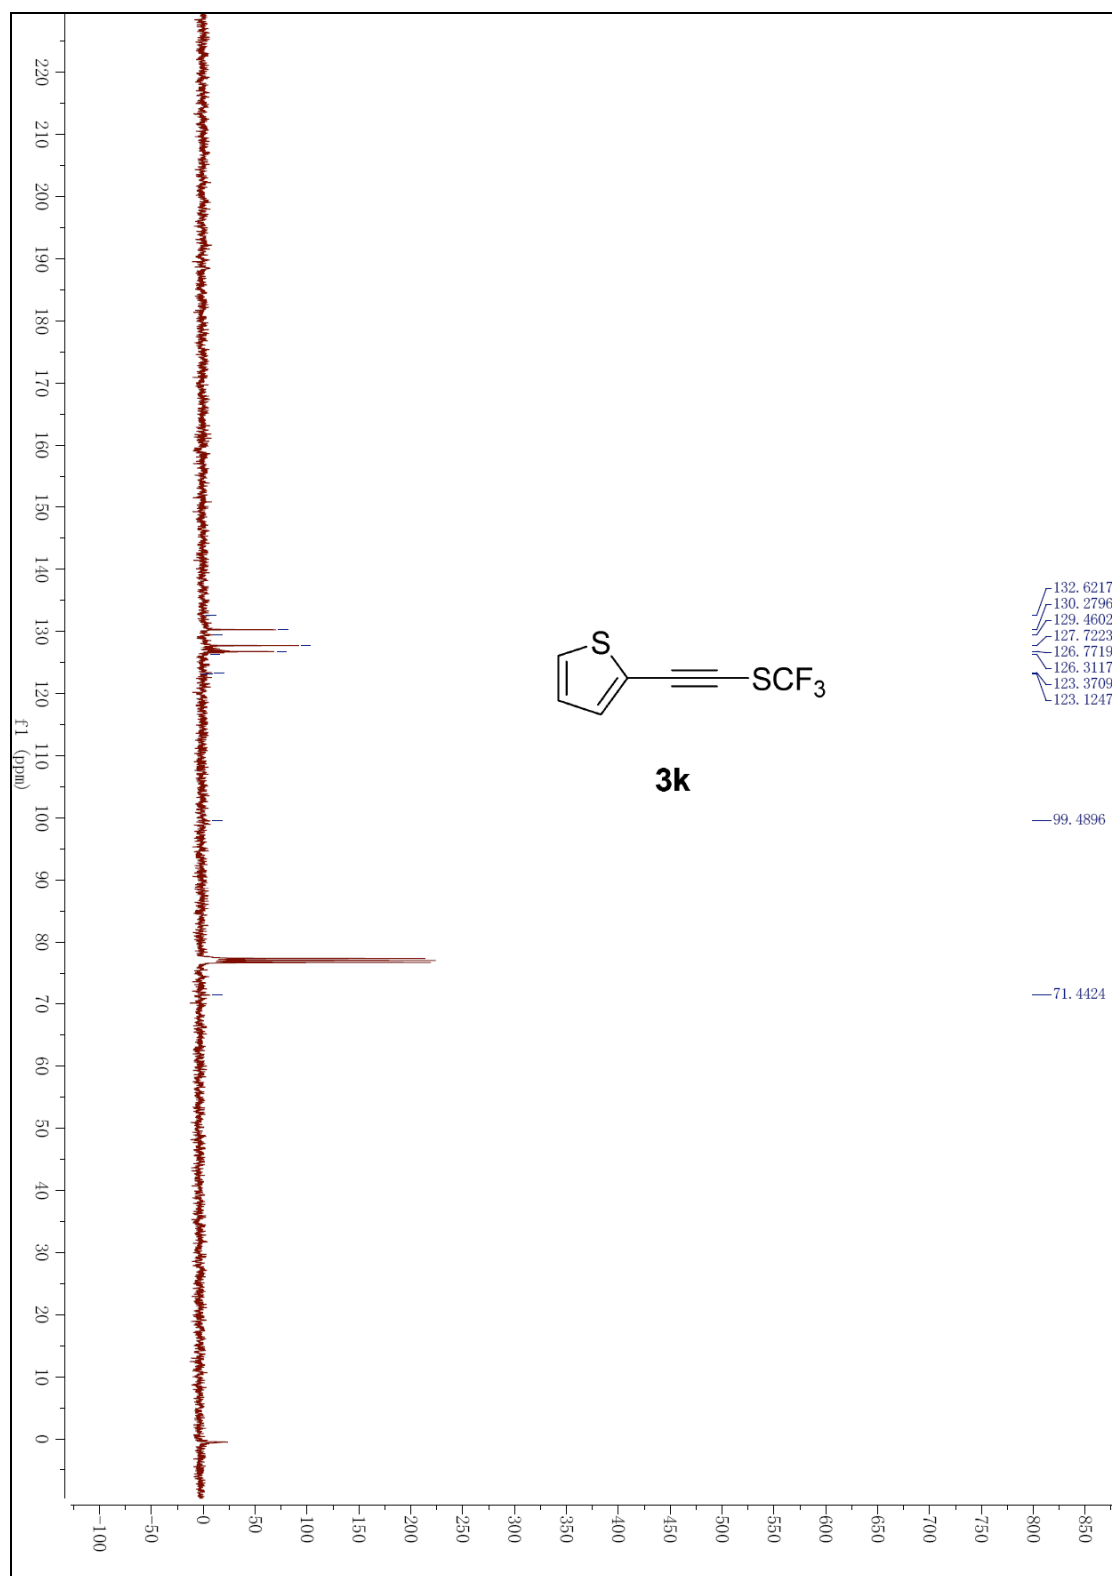

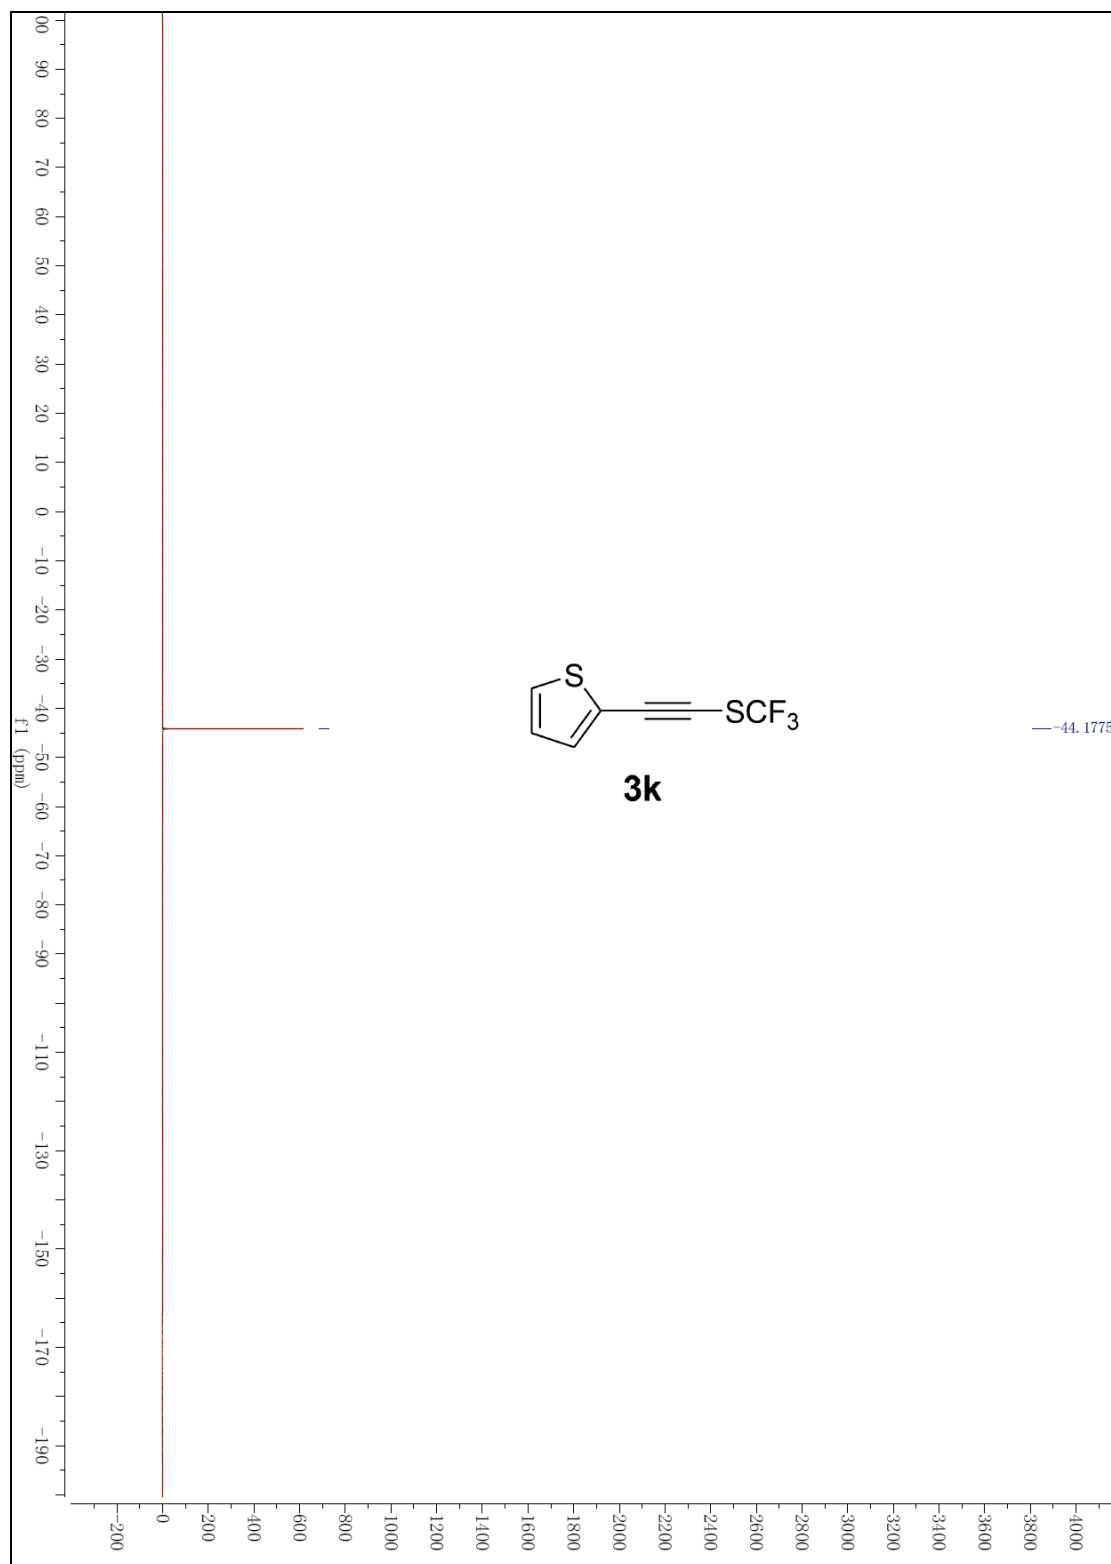

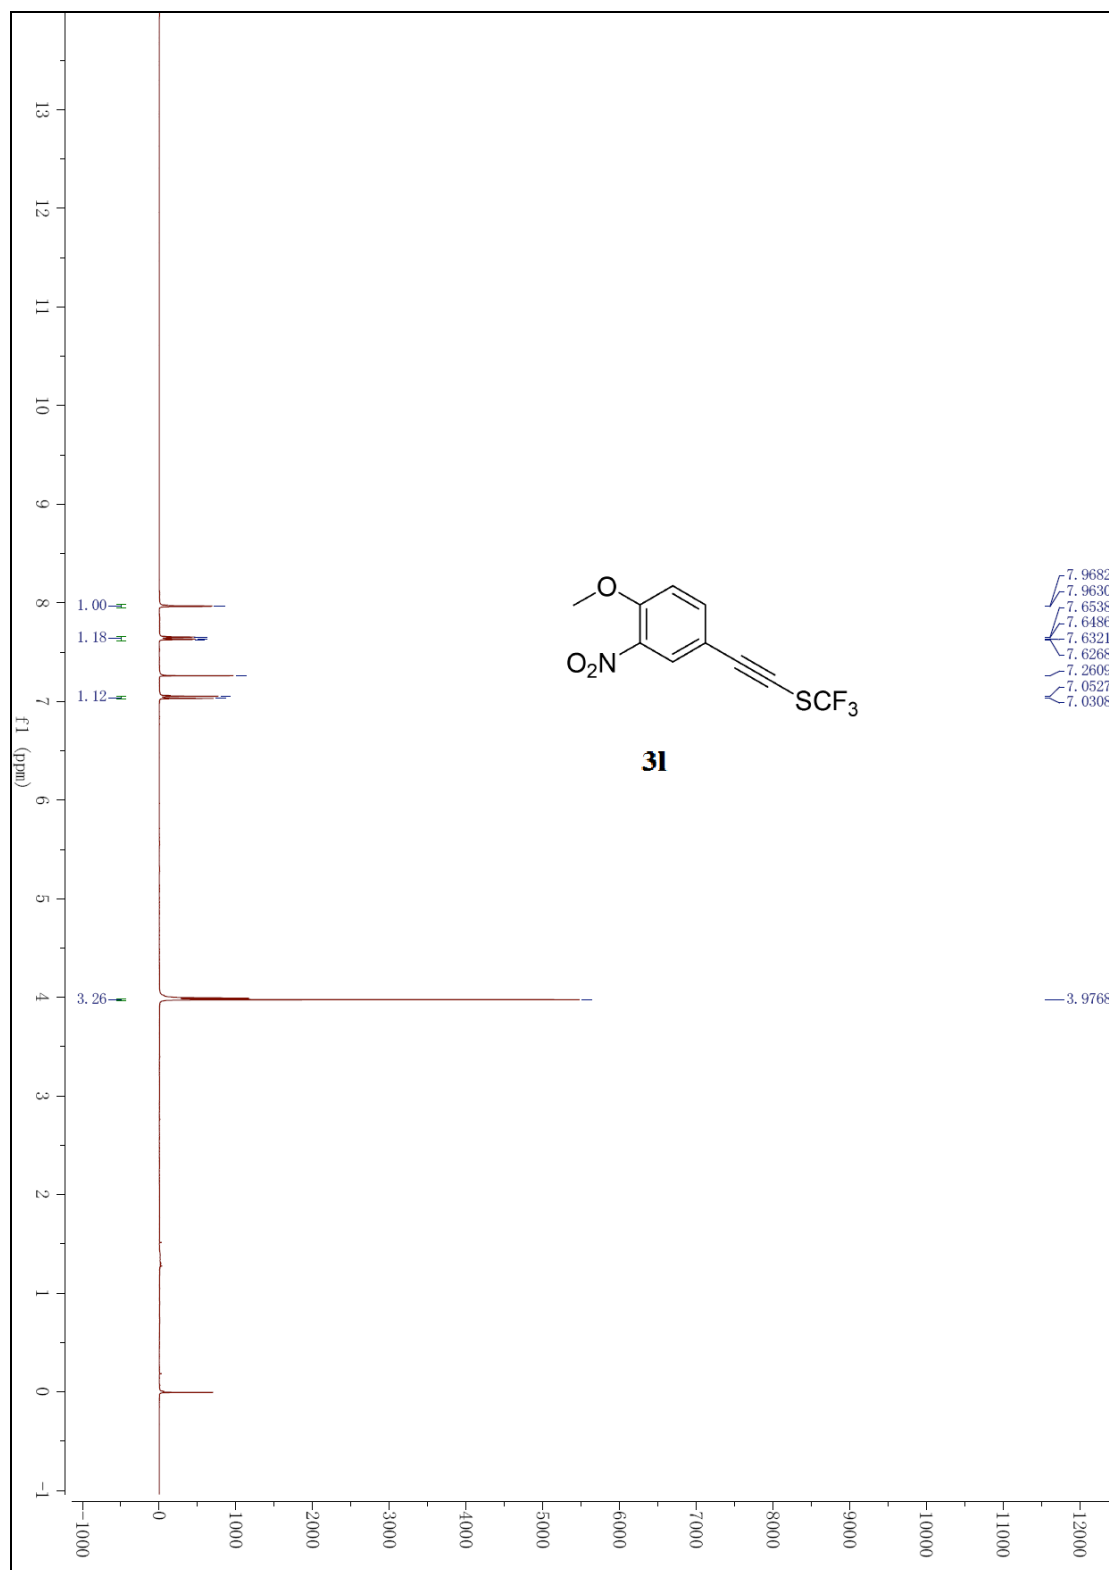



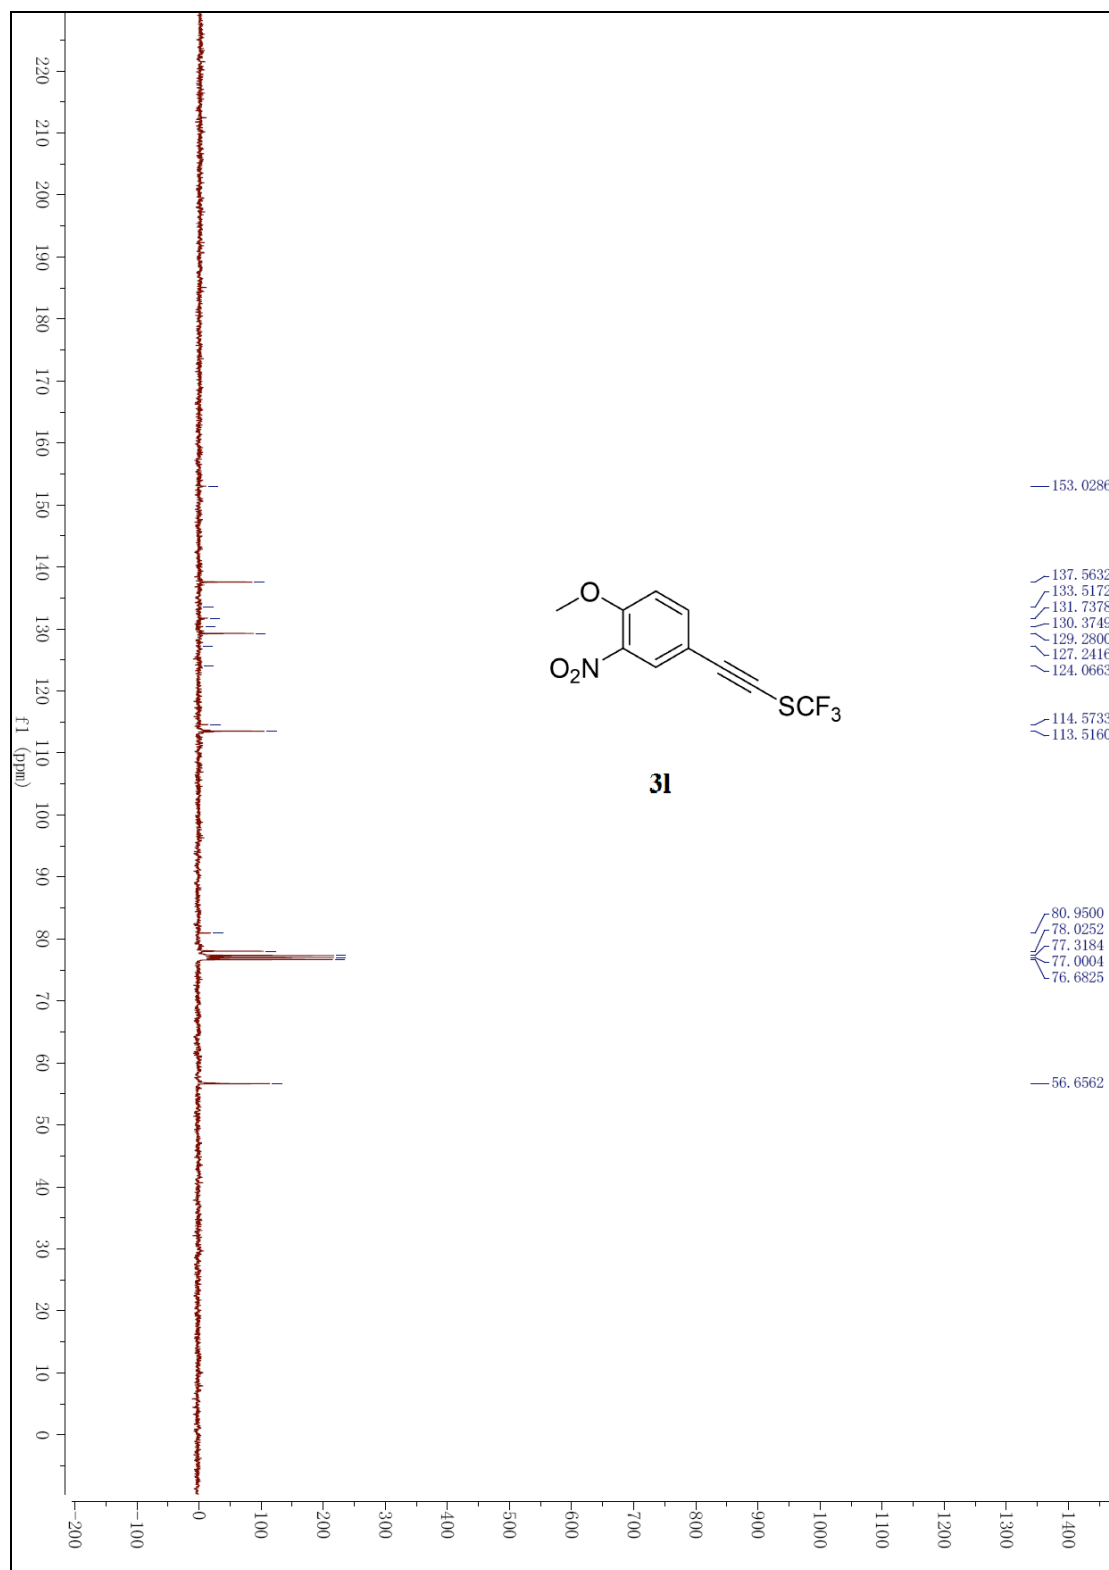

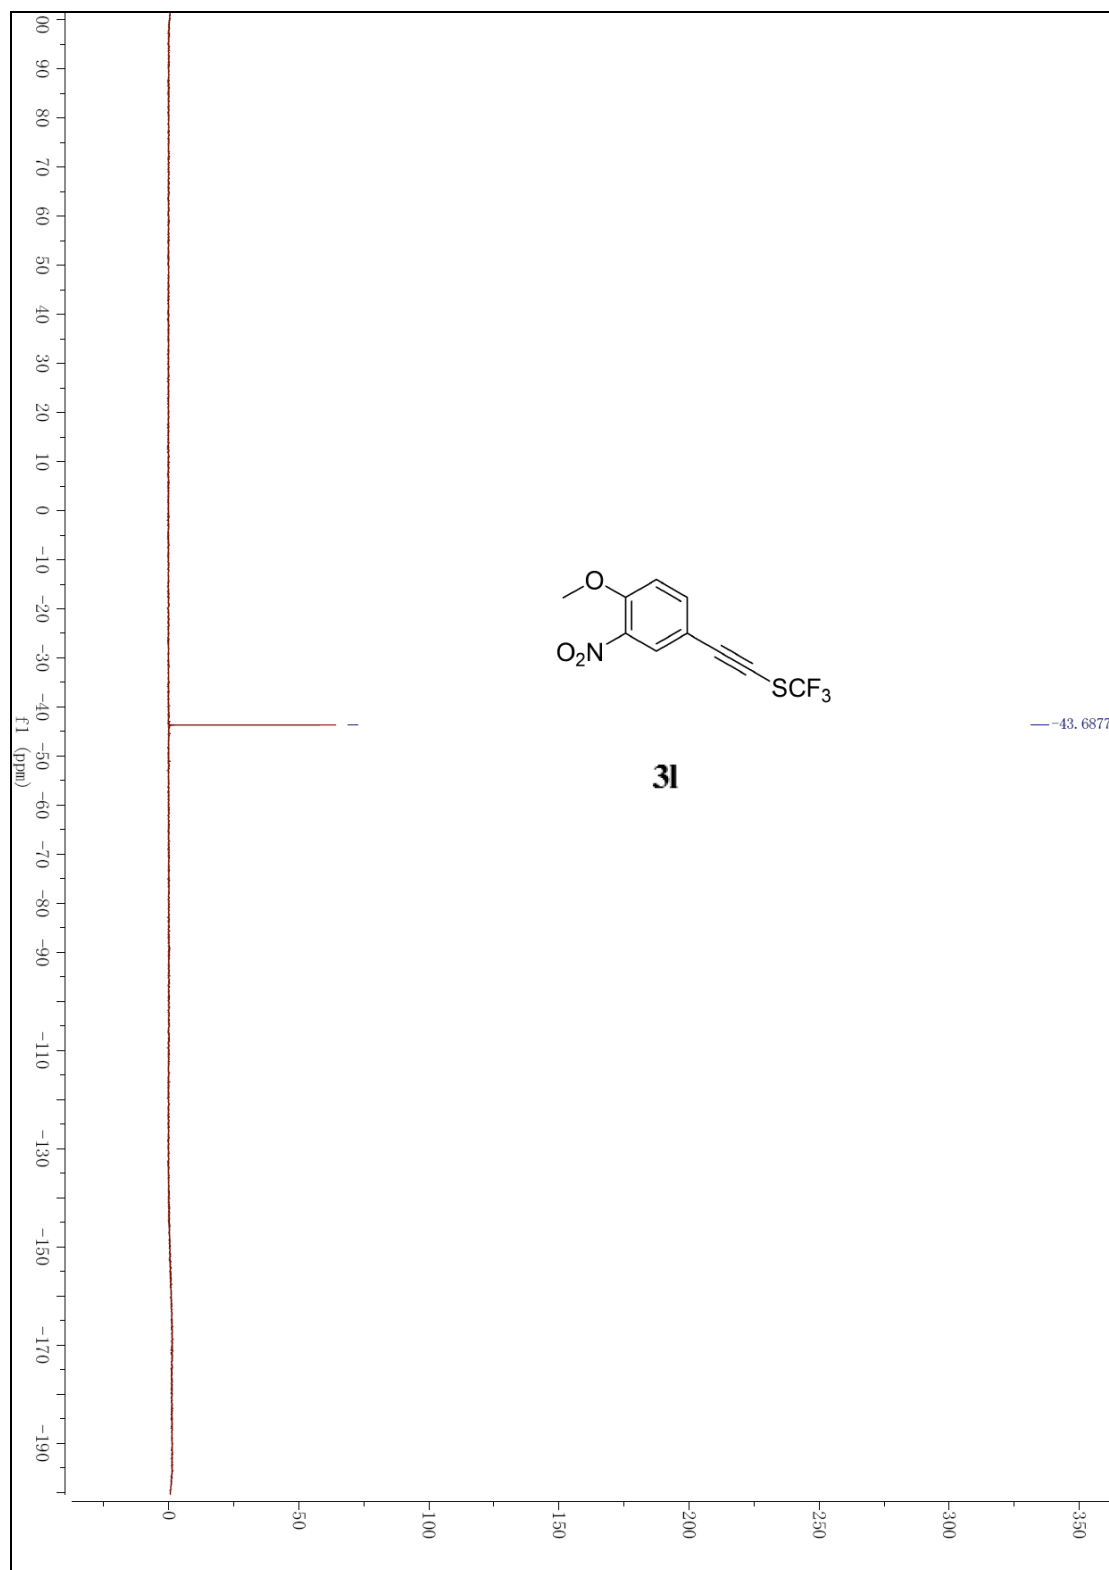

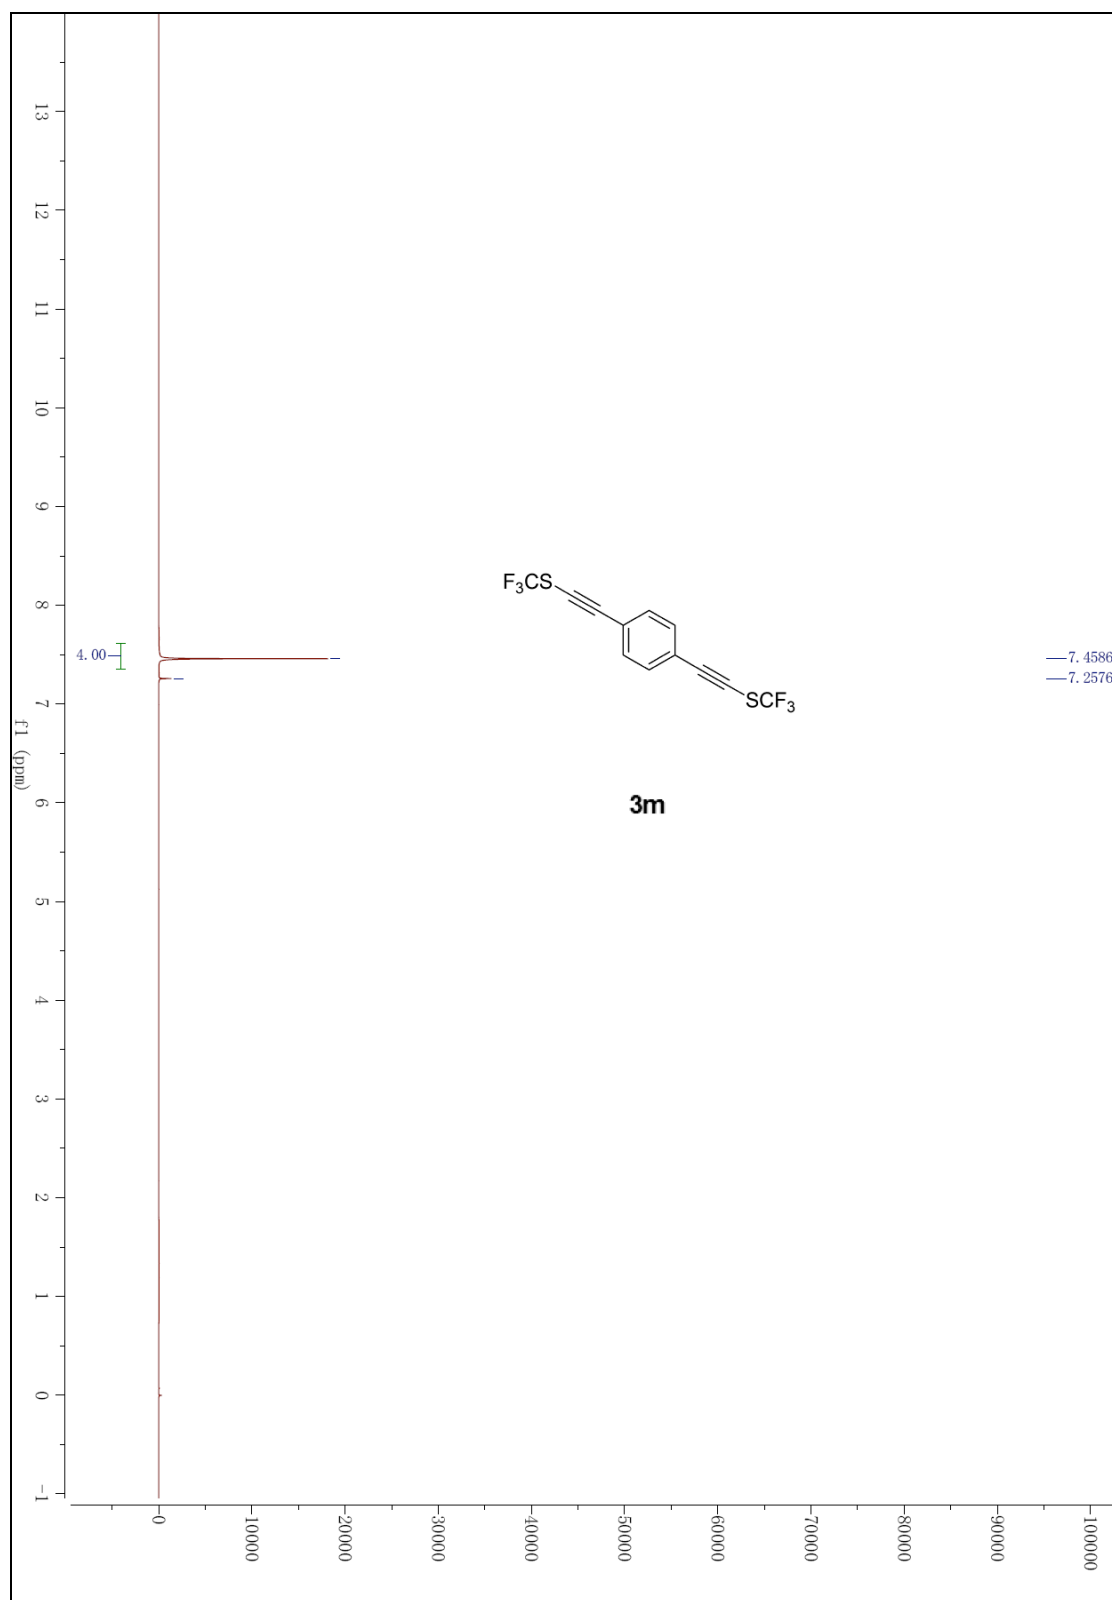

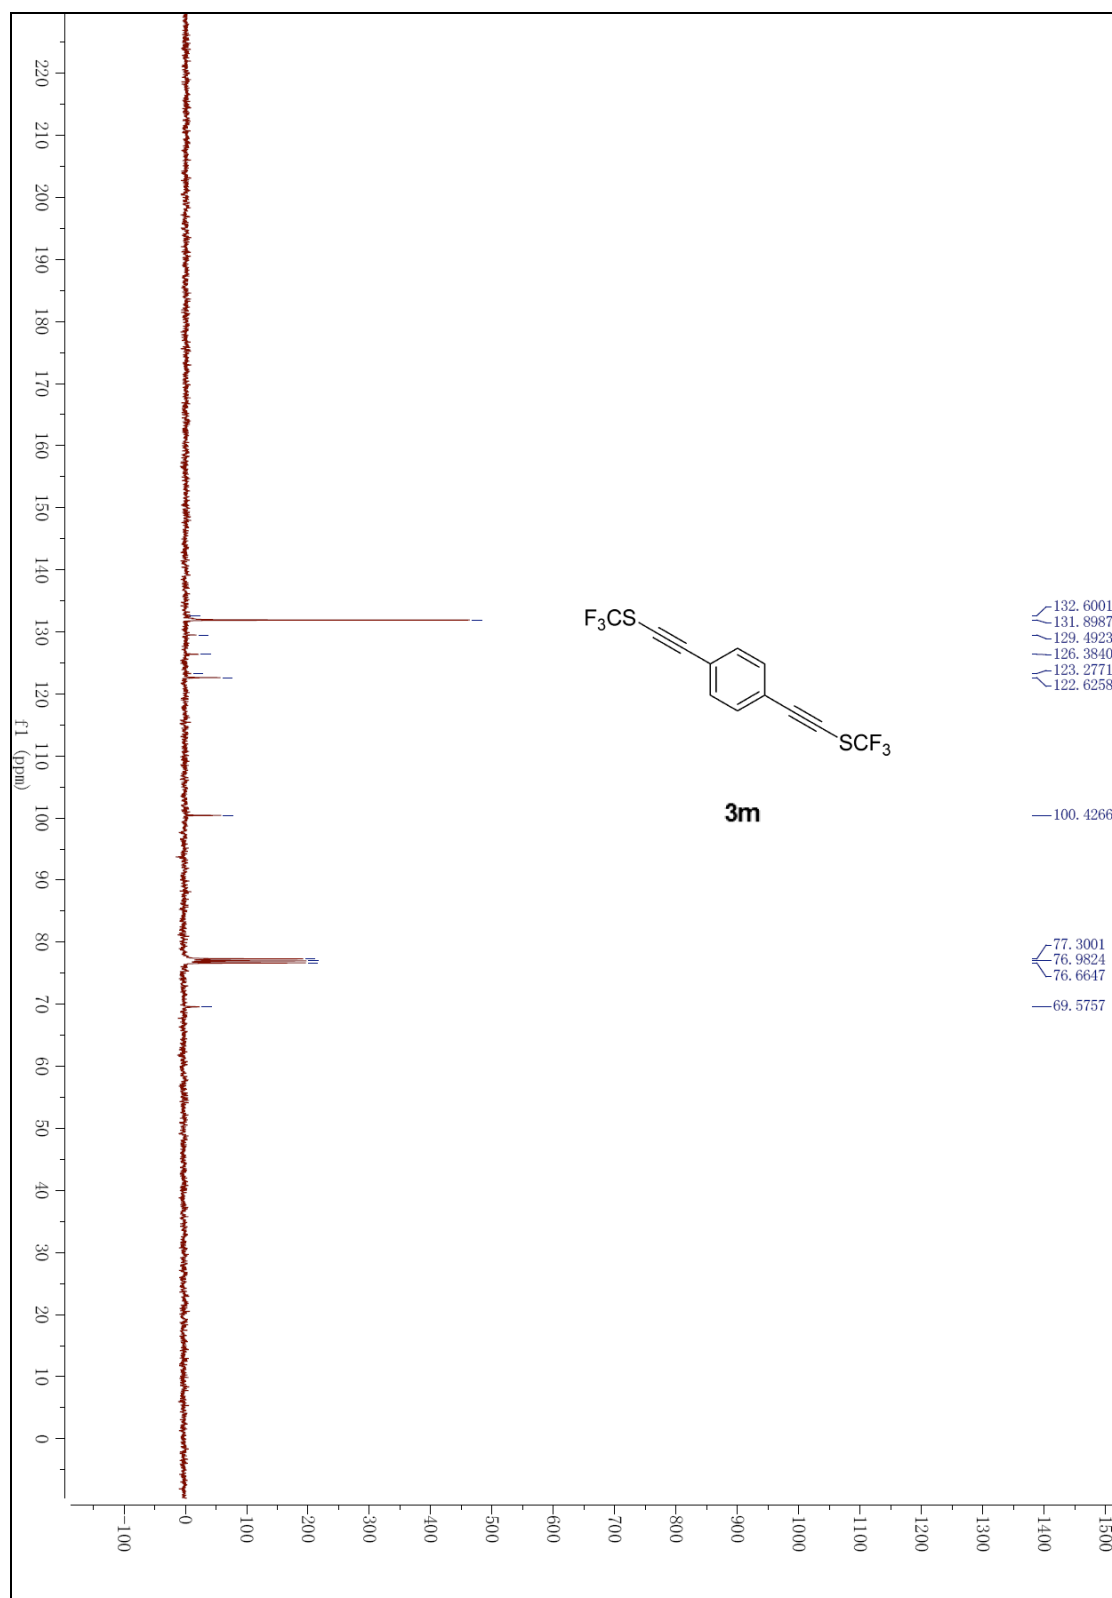

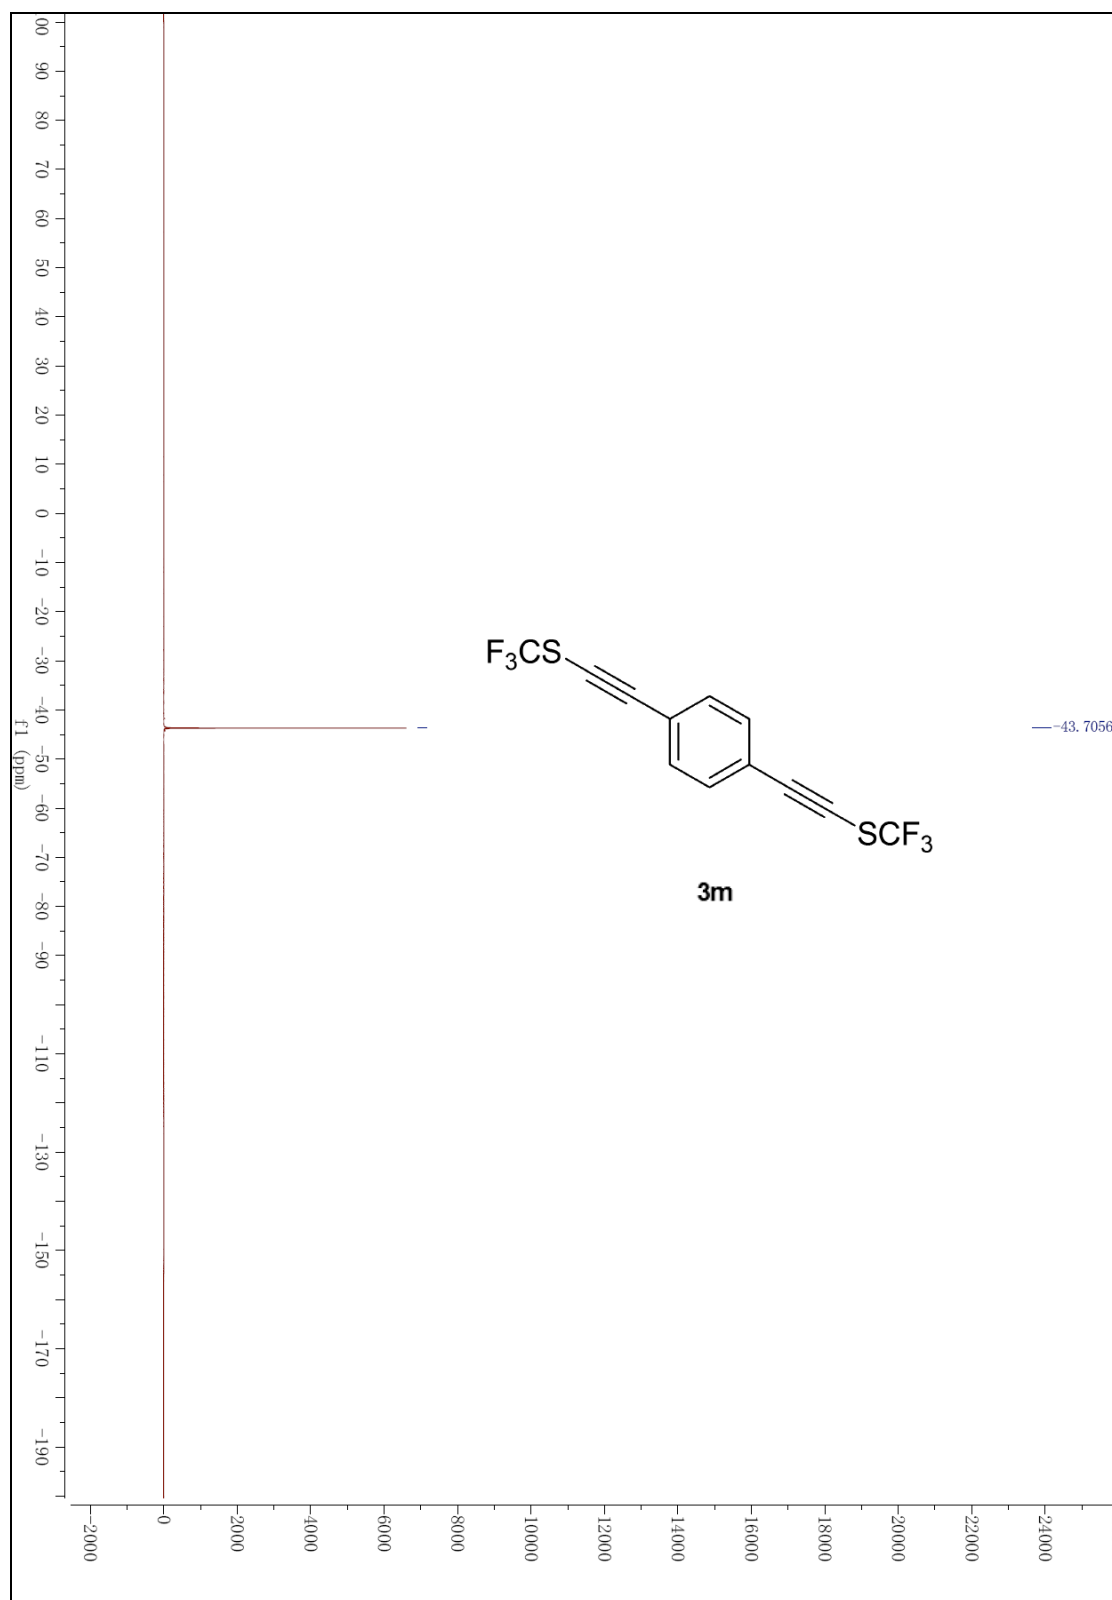

Supplement: c4ob01451k1.pdf [file c4ob01451k1.pdf]
